# Supplementary material for: PIDA mediated oxidative annulation of aryl methyl ketones: a facile approach for the chemoselective synthesis of 5-substituted oxazoles
Source: Royal Society of Chemistry journal article supplement (doi:10.1039/d4ob01427h), 2025-01-01
Supplement: d4ob01427h1.pdf [file d4ob01427h1.pdf]

## Supporting information

For

### PIDA-mediated oxidative annulation of aryl methyl ketone;

#### A Facile Approach for the chemoselective synthesis of 5-substituted Oxazoles

Mohankumar Devaraju and Jagadeesh Prasad Dasappa\*

Department of Chemistry, Mangalore University, Karnataka State, India-574199

#### Contents

|                                                                                              |       |
|----------------------------------------------------------------------------------------------|-------|
| 1. General Discussion                                                                        | 2     |
| 2. Single crystal X-ray crystallographic data of compounds ( <b>2e</b> , <b>2p</b> )         | 2-4   |
| 3. Experimental procedure for the synthesis of 5-substituted oxazole derivatives             | 5     |
| 4. Spectral data of 5-disubstituted oxazole derivatives                                      | 5-13  |
| 5. Copies of <sup>1</sup> H-NMR and <sup>13</sup> C-NMR of 5-substituted oxazole derivatives | 14-45 |

## 1. General Discussion:

All the materials used were purchased from commercial supplier i.e Sigma Aldrich and they were used in the reaction without further purification. The reaction completion was confirmed by using TLC (Thin layer Chromatography) plate precoated with silica gel. All the synthesized compounds were purified by column chromatography using silica gel (60-120 mesh size). The characterization of synthesized compounds was done by  $^1\text{H}$  NMR,  $^{13}\text{C}$  NMR, and HRMS (ESI) characterization techniques. The NMR spectra were recorded by the JEOL-NMR Spectrometer instrument (JNM-ECZ400S/L1, 400 MHz) using DMSO- $d_6$  as a solvent with residual peaks at  $\delta$  3.3 and 2.5 ppm and at 7.25 ( $\text{CDCl}_3$ ). Chemical shift ( $\delta$ ) values of compounds were recorded relative to internal standard TMS (tetramethylsilane). The multiplicity of NMR signals was expressed with abbreviations like s-singlet, d-doublet, t-triplet, q-quartet, dd-doublet of the doublet, m-multiplet, etc and Coupling constants (J -values) expressed in terms of Hz.

## 2. Crystallographic data and molecular structure

### 2.1 Crystal structure of 5-(3,4-dimethoxyphenyl)oxazole (2e)

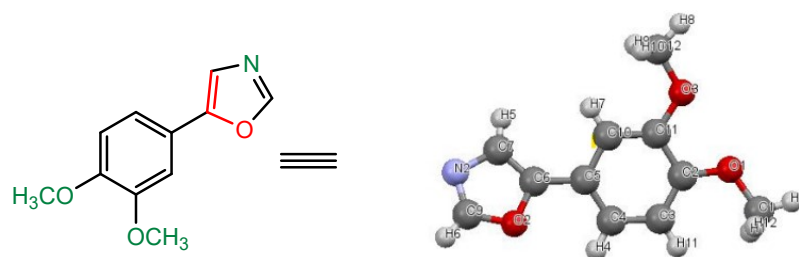

Figure 1. X-ray crystal structure of compound (2e)

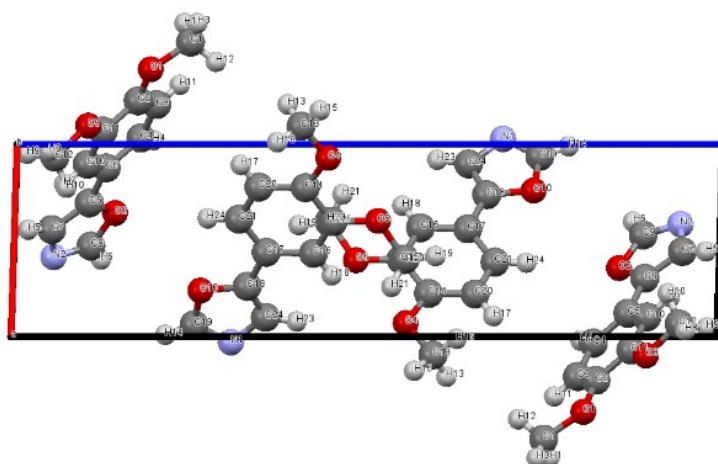

Figure 2. Crystal packing of compound 2e along b-axis

**Table 1 Crystal data and structure refinement for (2e).**

|                                             |                                                               |
|---------------------------------------------|---------------------------------------------------------------|
| CCDC No                                     | 2291745                                                       |
| Identification code                         | AG16-R                                                        |
| Empirical formula                           | C <sub>11</sub> H <sub>11</sub> NO <sub>3</sub>               |
| Formula weight                              | 406.44                                                        |
| Temperature/K                               | 298.15                                                        |
| Crystal system                              | monoclinic                                                    |
| Space group                                 | P2 <sub>1</sub>                                               |
| a/Å                                         | 5.6243(2)                                                     |
| b/Å                                         | 8.6813(4)                                                     |
| c/Å                                         | 20.6205(9)                                                    |
| α/°                                         | 90                                                            |
| β/°                                         | 91.817(2)                                                     |
| γ/°                                         | 90                                                            |
| Volume/Å <sup>3</sup>                       | 1006.32(7)                                                    |
| Z                                           | 2                                                             |
| ρ <sub>calc</sub> /g/cm <sup>3</sup>        | 1.341                                                         |
| μ/mm <sup>-1</sup>                          | 0.094                                                         |
| F(000)                                      | 430.0                                                         |
| Crystal size/mm <sup>3</sup>                | 0.342 × 0.179 × 0.097                                         |
| Radiation                                   | MoKα (λ = 0.71073)                                            |
| 2θ range for data collection/°              | 5.092 to 59.268                                               |
| Index ranges                                | -7 ≤ h ≤ 6, -12 ≤ k ≤ 12, -28 ≤ l ≤ 28                        |
| Reflections collected                       | 26669                                                         |
| Independent reflections                     | 5642 [R <sub>int</sub> = 0.0227, R <sub>sigma</sub> = 0.0184] |
| Data/restraints/parameters                  | 5642/1/275                                                    |
| Goodness-of-fit on F <sup>2</sup>           | 1.151                                                         |
| Final R indexes [I >= 2σ (I)]               | R <sub>1</sub> = 0.0414, wR <sub>2</sub> = 0.1193             |
| Final R indexes [all data]                  | R <sub>1</sub> = 0.0485, wR <sub>2</sub> = 0.1343             |
| Largest diff. peak/hole / e Å <sup>-3</sup> | 0.29/-0.42                                                    |
| Flack parameter                             | -0.04(17)                                                     |

## 2.1 Crystal structure of 5-(4-(methylsulfonyl)phenyl)oxazole (2p)

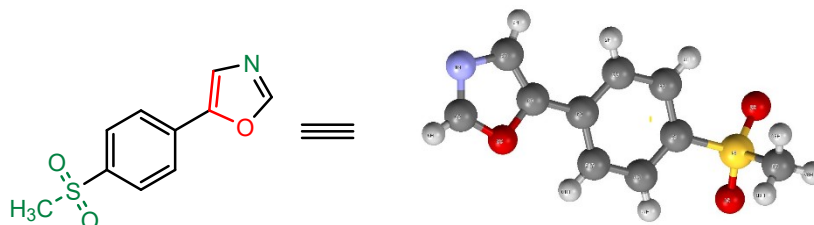

**Figure 3.** X-ray crystal structure of compound (2p)

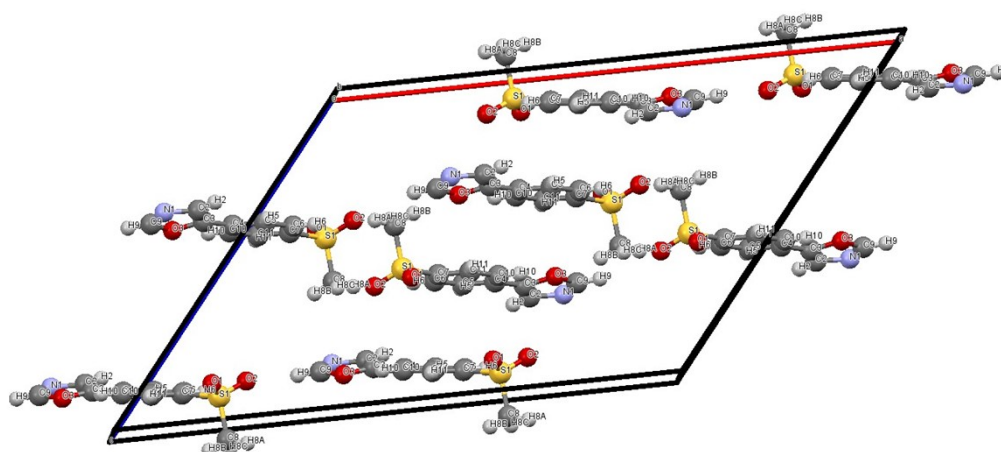

**Figure 4.** Crystal packing of compound **2p** along b-axis

**Table.2** Crystal Data and structure refinement for compound **2p**

|                                    |                                                  |
|------------------------------------|--------------------------------------------------|
| CCDC No                            | 2354099                                          |
| Identification code                | AG11                                             |
| Empirical formula                  | C <sub>10</sub> H <sub>9</sub> NO <sub>3</sub> S |
| Formula weight                     | 223.65                                           |
| Temperature/K                      | 298.15                                           |
| Crystal system                     | monoclinic                                       |
| Space group                        | C2/c                                             |
| a/Å                                | 22.6755(9)                                       |
| b/Å                                | 7.0600(3)                                        |
| c/Å                                | 16.2241(7)                                       |
| α/°                                | 90                                               |
| β/°                                | 129.1550(10)                                     |
| γ/°                                | 90                                               |
| Volume/Å <sup>3</sup>              | 2014.05(15)                                      |
| Z                                  | 8                                                |
| ρ <sub>calc</sub> /cm <sup>3</sup> | 1.475                                            |
| μ/mm <sup>-1</sup>                 | 0.356                                            |
| F(000)                             | 928.0                                            |
| Crystal size/mm <sup>3</sup>       | 0.32 × 0.193 × 0.112                             |
| Radiation                          | MoKα (λ = 0.71073)                               |
| 2θ range for data collection/°     | 5.05 to 61.12                                    |
| Index ranges                       | -32 ≤ h ≤ 32, -10 ≤ k ≤ 10, -23 ≤ l ≤ 23         |
| Reflections collected              | 32079                                            |

|                                                |                                                                  |
|------------------------------------------------|------------------------------------------------------------------|
| Independent reflections                        | 3075 [ $R_{\text{int}} = 0.0288$ , $R_{\text{sigma}} = 0.0150$ ] |
| Data/restraints/parameters                     | 3075/0/137                                                       |
| Goodness-of-fit on $F^2$                       | 1.209                                                            |
| Final R indexes [ $I \geq 2\sigma(I)$ ]        | $R_1 = 0.0550$ , $wR_2 = 0.1476$                                 |
| Final R indexes [all data]                     | $R_1 = 0.0659$ , $wR_2 = 0.1648$                                 |
| Largest diff. peak/hole / $e \text{ \AA}^{-3}$ | 0.40/-0.29                                                       |

### 3. Experimental procedure for the synthesis of 5-substituted Oxazole derivatives:

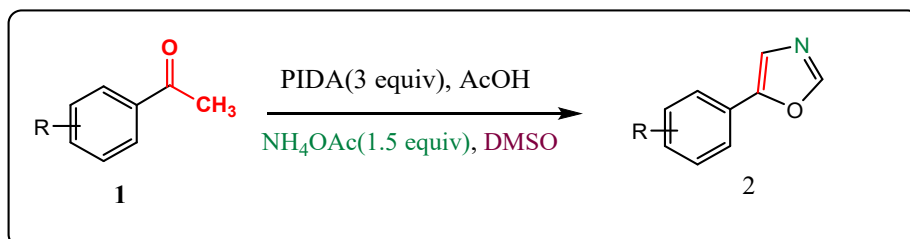

A well-dried round bottom flask was charged with substituted acetophenone (**1**, 1.0 mmol), PIDA (3.0 mmol), acetic acid (10 equiv, 0.6 mL), and DMSO (10 mL) and heated at 120 °C for 2h. After the confirmation of the formation of  $\alpha$ -acylated acetophenone, NH<sub>4</sub>OAc (1.5 equiv) was added to the mixture and heated at 120 °C for 6h. The reaction completion was confirmed by TLC followed by the reaction mixture quenched with saturated brine solution and extracted twice by using ethyl acetate. After the solvent evaporation by using a rotary evaporator, the obtained crude product was purified by column chromatography by using silica gel (60-120 mesh size) (eluting solvent hexane: ethyl acetate; 10:2).

### 4. Spectral data of 5-disubstituted oxazole derivatives:

#### i) 5-(4-methoxyphenyl)oxazole (**2a**)<sup>1,2</sup>

Yield: 161mg, 92%; Colourless solid; m.p. 58-60 °C;

<sup>1</sup>H-NMR (400 MHz, DMSO-d<sub>6</sub>)  $\delta$  8.39 (s, 1H), 7.68 (d,  $J = 8.7$  Hz, 2H), 7.55 (s, 1H), 7.06 (d,  $J = 8.9$  Hz, 2H), 3.82 (s, 3H); <sup>13</sup>C-NMR (101 MHz, DMSO-d<sub>6</sub>)  $\delta$  159.5, 151.1, 150.7, 125.7, 120.3, 120.2, 114.6, 55.3;

LCMS (ESI) Calcd for C<sub>10</sub>H<sub>9</sub>NO<sub>2</sub> [M+H]<sup>+</sup>, 176.0706; found, 176.8379.

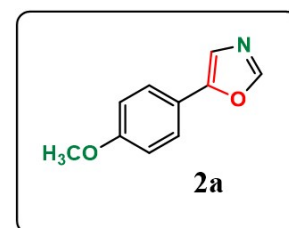

ii) **4-(oxazol-5-yl)phenol (2b)**

Yield: 136mg, 85%; Colourless solid; m.p. 140-142 °C;

<sup>1</sup>H NMR (400 MHz, DMSO-d<sub>6</sub>) δ 9.83 (s, 1H), 8.30 (s, 1H), 7.52 (d, *J* = 8.7 Hz, 2H), 7.42 (s, 1H), 6.84 (d, *J* = 8.7 Hz, 2H); <sup>13</sup>C NMR (101 MHz, DMSO-d<sub>6</sub>) δ 158.0, 151.0, 150.9, 125.9, 119.6, 118.7, 115.9;

LCMS (ESI) Calcd for C<sub>9</sub>H<sub>7</sub>NO<sub>2</sub> [M+H]<sup>+</sup>, 162.055; found, 162.131.

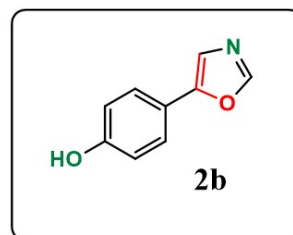

iii) **5-([1,1'-biphenyl]-4-yl)oxazole (2c)**

Yield: 98 mg, 88%; Colourless solid; m.p. 90-94 °C;

<sup>1</sup>H NMR (400 MHz, CDCl<sub>3</sub>) δ 7.84 (s, 1H), 7.63 (d, *J* = 8.6 Hz, 2H), 7.58-7.52 (m, 4H), 7.39-7.35 (m, 2H), 7.28 (t, *J* = 7.2 Hz, 2H); <sup>13</sup>C NMR (101 MHz, CDCl<sub>3</sub>) δ 151.3, 150.5, 141.3, 140.2, 128.8, 127.6, 127.5, 126.9, 126.6, 124.8, 121.5,

LCMS (ESI) Calcd for C<sub>15</sub>H<sub>11</sub>NO [M+H]<sup>+</sup>, 222.0914; found, 222.050.

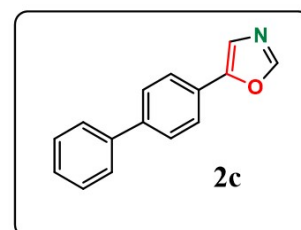

v) **5-(2,4-dimethoxyphenyl)oxazole(2d)<sup>1</sup>**

Yield: 157 mg, 77%; Colourless liquid;

<sup>1</sup>H NMR (400 MHz, CDCl<sub>3</sub>) δ 7.73 (s, 1H), 7.53 (d, *J* = 8.6 Hz, 1H), 6.43 (dd, *J* = 8.6, 2.3 Hz, 1H), 6.38 (d, *J* = 2.4 Hz, 1H), 3.76 (s, 3H), 3.69 (s, 3H); <sup>13</sup>C NMR (101 MHz, CDCl<sub>3</sub>) δ 160.7, 156.7, 148.7, 147.8, 126.6, 123.3, 110.1, 104.7, 98.3, 55.1;

LCMS (ESI) Calcd for C<sub>11</sub>H<sub>11</sub>NO<sub>3</sub> [M+H]<sup>+</sup>, 206.0812; found, 206.0500.

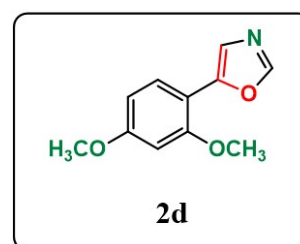

iv) **5-(3,4-dimethoxyphenyl)oxazole (2e)**

Yield: 196 mg, 96%; Colourless solid; m.p. 98-100 °C;

<sup>1</sup>H NMR (400 MHz, DMSO-d<sub>6</sub>) δ 8.32 (s, 1H), 7.54 (s, 1H), 7.24-7.21 (m, 2H), 7.00 (d, *J* = 8.3 Hz, 1H), 3.80 (s, 3H), 3.76 (s, 3H); <sup>13</sup>C NMR (101 MHz, DMSO-d<sub>6</sub>) δ 151.2, 150.9, 149.4, 149.3, 120.7, 120.4, 117.0, 112.2, 107.9, 55.7, 55.7;

LCMS(ESI) Calcd for C<sub>11</sub>H<sub>11</sub>NO<sub>3</sub> [M+H]<sup>+</sup>, 206.0812; found, 206.95.

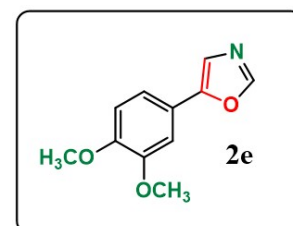

vi) **5-(4-chlorophenyl)oxazole (2f)**<sup>1,2</sup>

Yield: 103 mg, 58%; Colourless solid; m.p. 80-82 °C;

<sup>1</sup>H NMR (400 MHz, DMSO-d<sub>6</sub>) δ 8.49 (s, 1H), 7.76 (t, *J* = 4.2 Hz, 3H), 7.55 (d, *J* = 8.6 Hz, 2H); <sup>13</sup>C NMR (101 MHz, DMSO-d<sub>6</sub>) δ 152.0, 149.6, 133.1, 129.1, 126.3, 125.8, 122.6;

LCMS (ESI) Calcd for C<sub>9</sub>H<sub>6</sub>ClNO [M+H]<sup>+</sup>, 180.0211; found, 180.050.

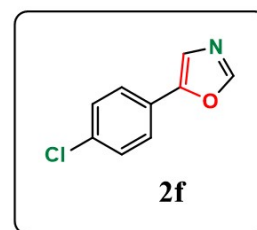

vii) **5-(4-bromophenyl)oxazole (2g)**<sup>1,2</sup>

Yield: 182 mg, 82%; Colourless solid; m.p. 76-78 °C;

<sup>1</sup>H-NMR (400 MHz, DMSO-d<sub>6</sub>) δ 8.48 (s, 1H), 7.75 (s, 1H), 7.68 (s, 4H); <sup>13</sup>C-NMR (101 MHz, DMSO-d<sub>6</sub>) δ 152.2, 149.7, 132.2, 126.7, 126.2, 122.7, 121.8; LCMS(ESI) Calcd for C<sub>9</sub>H<sub>6</sub>BrNO [M+H]<sup>+</sup>, 223.9706; found, 223.60, 225.3 (M+H+2)<sup>+</sup>, 227.2(M+H+4)<sup>+</sup>.

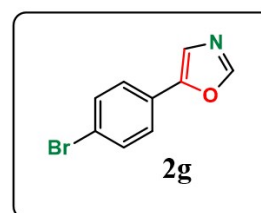

viii) **5-(4-fluorophenyl)oxazole (2h)**<sup>1,2</sup>

Yield: 147 mg, 91%; Colourless liquid;

<sup>1</sup>H NMR (400 MHz, DMSO-d<sub>6</sub>) δ 8.43 (s, 1H), 7.81-7.77 (m, 2H), 7.67 (s, 1H), 7.34 (t, *J* = 8.9 Hz, 2H); <sup>13</sup>C NMR (101 MHz, DMSO-d<sub>6</sub>) δ 163.4, 161.0, 151.9, 149.9, 126.6, 126.5, 124.2, 121.9, 116.5, 116.2;

LCMS (ESI) Calcd for C<sub>9</sub>H<sub>10</sub>O<sub>3</sub> [M]<sup>+</sup>, 163.0433; found, 163.0857.

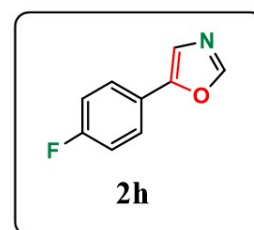

ix) **5-(2,4-dichlorophenyl)oxazole (2i)**

Yield: 122 mg, 58%; Colourless solid; m.p. 68-70 °C;

<sup>1</sup>H NMR (400 MHz, DMSO-d<sub>6</sub>) δ 8.60 (s, 1H), 7.83-7.74 (m, 3H), 7.56 (dd, *J* = 8.5, 2.2 Hz, 1H); <sup>13</sup>C NMR (101 MHz, DMSO-d<sub>6</sub>) δ 152.2, 146.3, 133.6, 130.5, 130.0, 129.1, 128.0, 126.3, 124.9;

LCMS (ESI) Calcd for C<sub>9</sub>H<sub>5</sub>Cl<sub>2</sub>NO [M+H]<sup>+</sup>, 213.9821; found, 213.800.

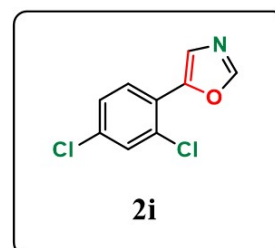

x) **5-(3,4-dichlorophenyl)oxazole (2j)**

Yield: 97 mg, 46%; Yellow liquid;

$^1\text{H NMR}$  (400 MHz, DMSO- $d_6$ )  $\delta$  8.44 (s, 1H), 7.87 (d,  $J = 1.7$  Hz, 1H), 7.77 (s, 1H), 7.61 (t,  $J = 2.0$  Hz, 2H);

$^{13}\text{C NMR}$  (101 MHz, DMSO- $d_6$ )  $\delta$  152.4, 148.3, 132.0, 131.2, 130.9, 127.9, 125.6, 124.0, 123.7;

LCMS(ESI) Calcd for  $\text{C}_9\text{H}_5\text{Cl}_2\text{NO}$   $[\text{M}+\text{H}]^+$ , 213.9821; found, 213.8.

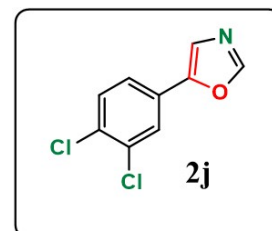

xi) **5-(naphthalen-2-yl)oxazole (2k)**

Yield: 163 mg, 84%; Colourless solid; m.p. 122-124 °C;

$^1\text{H NMR}$  (400 MHz, DMSO- $d_6$ )  $\delta$  8.52 (s, 1H), 8.28 (s, 1H), 8.04-7.83 (m, 5H), 7.61-7.55 (m, 2H);  $^{13}\text{C NMR}$  (101 MHz, DMSO- $d_6$ )  $\delta$  151.6, 150.9, 138.5, 129.8, 124.8, 124.2, 121.3;

LCMS (ESI) Calcd for  $\text{C}_{13}\text{H}_9\text{NO}$   $[\text{M}+\text{H}]^+$ , 196.0757; found, 196.000.

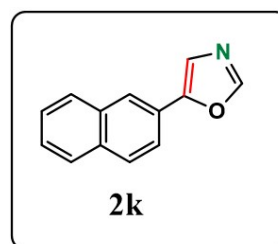

xii) **5-(naphthalen-1-yl)oxazole (2l)<sup>2</sup>**

Yield: 198 mg, 78%; Colourless liquid; m.p. 122-126 °C;

$^1\text{H NMR}$  (400 MHz,  $\text{CDCl}_3$ )  $\delta$  8.25 (d,  $J = 7.6$  Hz, 1H), 8.07 (s, 1H), 7.90-7.88 (m, 2H), 7.73 (d,  $J = 7.2$  Hz, 1H), 7.59-7.46 (m, 4H);

$^{13}\text{C NMR}$  (101 MHz,  $\text{CDCl}_3$ )  $\delta$  150.8, 150.6, 133.7, 130.0, 129.7, 128.6, 127.0, 126.6, 126.2, 125.1, 125.0, 124.8, 124.7.

LCMS(ESI) Calcd for  $\text{C}_{13}\text{H}_9\text{NO}$   $[\text{M}+\text{H}]^+$ , 196.0757; found, 197.50

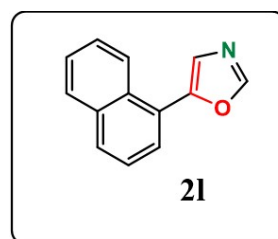

xiii) **5-(4-nitrophenyl)oxazole (2m)<sup>1,2</sup>**

Yield: 98 mg, 52%; Colourless solid; m.p. 134-136 °C;

$^1\text{H NMR}$  (400 MHz, DMSO- $d_6$ )  $\delta$  8.60 (s, 1H), 8.32 (d,  $J = 9.0$  Hz, 2H), 8.00 (d,  $J = 2.3$  Hz, 2H), 7.97 (s, 1H);  $^{13}\text{C NMR}$  (101 MHz, DMSO- $d_6$ )  $\delta$  153.5, 148.8, 146.8, 133.3, 125.7, 125.0, 124.6; LCMS (ESI) Calcd for  $\text{C}_9\text{H}_6\text{N}_2\text{O}_3$   $[\text{M}+\text{H}]^+$ , 191.0451; found, 190.90.

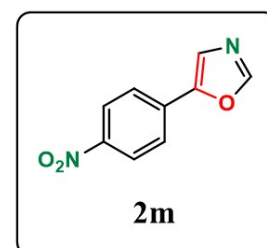



xiv) **5-(4-methoxy-3-nitrophenyl)oxazole (2n)**

Yield: 114 mg, 52%; Colourless solid; m.p. 138-140 °C;

$^1\text{H NMR}$  (400 MHz, DMSO- $d_6$ )  $\delta$  8.47 (s, 1H), 8.22 (d,  $J = 2.3$  Hz, 1H), 8.00 (dd,  $J = 8.8, 2.2$  Hz, 1H), 7.75 (s, 1H), 7.49 (d,  $J = 8.9$  Hz, 1H), 3.98 (s, 3H);  $^{13}\text{C NMR}$  (101 MHz, DMSO- $d_6$ )  $\delta$  152.0, 151.8, 148.6, 139.6, 129.8, 122.4, 120.5, 120.1, 115.3, 57.0;

LCMS (ESI) Calcd for  $\text{C}_{10}\text{H}_8\text{N}_2\text{O}_4$   $[\text{M}+\text{H}]^+$ , 221.0557; found, 222.000.

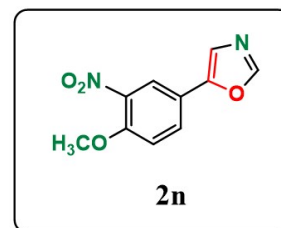

xv) **4-(oxazol-5-yl)benzonitrile (2o)**

Yield: 198 mg, 75%; Colourless solid; m.p. 70-72 °C;

$^1\text{H NMR}$  (400 MHz, DMSO- $d_6$ )  $\delta$  8.57 (s, 1H), 7.96-7.91 (m, 5H);  $^{13}\text{C NMR}$  (101 MHz, DMSO- $d_6$ )  $\delta$  153.1, 149.1, 133.2, 131.5, 125.0, 124.7, 118.7, 110.7;

LCMS (ESI) Calcd for  $\text{C}_{10}\text{H}_6\text{N}_2\text{O}$   $[\text{M}+\text{H}]^+$ , 171.0553; found, 171.90.

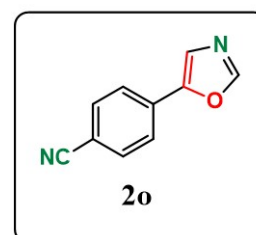

xvi) **5-(4-(methylsulfonyl)phenyl)oxazole (2p)<sup>1</sup>**

Yield: 136 mg, 61%; Colourless solid; m.p. 120-122 °C;

$^1\text{H NMR}$  (400 MHz, DMSO- $d_6$ )  $\delta$  8.59 (s, 1H), 8.06 (d,  $J = 8.7$  Hz, 2H), 8.00 (d,  $J = 8.7$  Hz, 2H), 7.96 (s, 1H), 3.43 (s, 3H);  $^{13}\text{C NMR}$  (101 MHz, DMSO- $d_6$ )  $\delta$  152.9, 149.1, 140.2, 131.9, 127.9, 124.7, 124.6, 43.5;

LCMS (ESI) Calcd for  $\text{C}_{10}\text{H}_9\text{NO}_3\text{S}$   $[\text{M}+\text{H}]^+$ , 224.0376; found, 224.1209 .

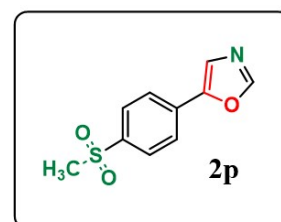

xvii) **5-phenyloxazole (2q)<sup>1,2</sup>**

Yield: 137mg, 95%; Colourless liquid; m.p. 82-84 °C;

$^1\text{H NMR}$  (400 MHz, DMSO- $d_6$ )  $\delta$  8.40 (s, 1H), 7.63 (d,  $J = 8.3$  Hz, 4H), 7.30 (d,  $J = 7.9$  Hz, 2H);

$^{13}\text{C NMR}$  (101 MHz, DMSO- $d_6$ )  $\delta$  151.6, 150.9, 138.5, 129.8, 124.8, 124.2, 121.3;

LCMS(ESI) Calcd for  $\text{C}_9\text{H}_7\text{NO}$   $[\text{M}+\text{H}]^+$ , 146.0601; found, 146.1329.

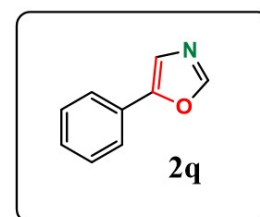

xviii) **5-(p-tolyl)oxazole (2r)**<sup>1,2</sup>

Yield: 128 mg, 81%; Colourless solid; m.p. 64-66 °C;

<sup>1</sup>H NMR (400 MHz, DMSO-d<sub>6</sub>) δ 8.40 (s, 1H), 7.63 (d, *J* = 8.3 Hz, 3H), 7.30 (d, *J* = 7.9 Hz, 2H), 2.35 (s, 3H);

<sup>13</sup>C NMR (101 MHz, DMSO-d<sub>6</sub>) δ 151.6, 150.9, 138.5, 129.8, 124.8, 124.2, 121.3, 21.0;

LCMS (ESI) Calcd for C<sub>10</sub>H<sub>9</sub>NO [M+H]<sup>+</sup>, 160.0757; found, 160.1541.

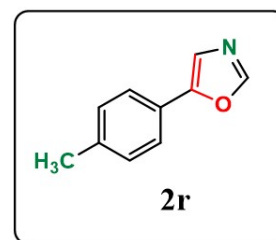

xix) **3-(oxazol-5-yl)phenol (2s)**<sup>1</sup>

Yield: 120 mg, 75%; Colourless solid; m.p. 102-104 °C;

<sup>1</sup>H NMR (400 MHz, DMSO-d<sub>6</sub>) δ 9.73 (s, 1H), 8.42 (s, 1H), 7.63 (s, 1H), 7.29 (t, *J* = 7.9 Hz, 1H), 7.18 (d, *J* = 7.8 Hz, 1H), 7.13 (t, *J* = 2.0 Hz, 1H), 6.81 (m, 1H); <sup>13</sup>C NMR (101 MHz, DMSO-d<sub>6</sub>) δ 157.9, 151.7, 150.6, 130.3, 128.6, 121.9, 115.8, 115.0, 110.7;

LCMS (ESI) Calcd for C<sub>9</sub>H<sub>7</sub>NO<sub>2</sub> [M+H]<sup>+</sup>, 162.055; found, 161.90.

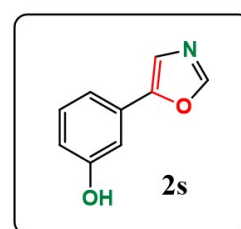

xx) **5-(benzo[d][1,3]dioxol-5-yl)oxazole (2t)**

Yield: 128 mg, 68%; Colourless solid; m.p. 88-90 °C;

<sup>1</sup>H NMR (400 MHz, CDCl<sub>3</sub>) δ 7.85 (s, 1H), 7.20 (s, 1H), 7.15 (dd, *J* = 8.1, 1.7 Hz, 1H), 7.09 (d, *J* = 1.7 Hz, 1H), 6.85 (d, *J* = 8.1 Hz, 1H), 5.99 (s, 2H); <sup>13</sup>C NMR (101 MHz, CDCl<sub>3</sub>) δ 151.3, 149.9, 148.1, 147.9, 121.9, 120.3, 118.5, 108.7, 104.9, 101.3;

LCMS (ESI) Calcd for C<sub>10</sub>H<sub>7</sub>NO<sub>3</sub> [M+H]<sup>+</sup>, 190.0499; found, 190.900.

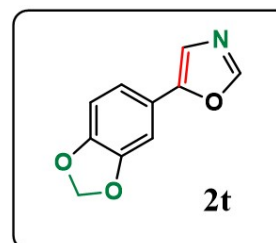

xxi) **3-(oxazol-5-yl)-2H-chromen-2-one (2u)**

Yield: 132 mg, 62%; Colourless solid; m.p. 98-100 °C;

<sup>1</sup>H NMR (400 MHz, DMSO-d<sub>6</sub>) δ 8.55 (s, 1H), 8.39 (s, 1H), 7.88-7.84 (m, 1H), 7.71-7.59 (m, 2H), 7.44-7.36 (m, 2H); <sup>13</sup>C NMR (101 MHz, DMSO-d<sub>6</sub>) δ 157.2, 152.6, 152.4, 145.2, 136.7, 132.5, 129.2, 126.8, 125.1, 118.7, 116.2, 115.1;

LCMS (ESI) Calcd for C<sub>12</sub>H<sub>7</sub>NO<sub>3</sub> [M+H]<sup>+</sup>, 214.0499; found, 214.0497.

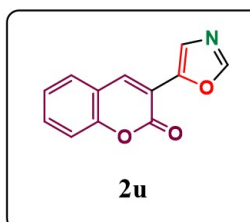

xxii) **5-(thiophen-2-yl)oxazole (2v)**

Yield: 124 mg, 82%; Colourless solid; m.p. 78-82 °C;

$^1\text{H NMR}$  (400 MHz, DMSO- $d_6$ )  $\delta$  8.55 (s, 1H), 7.95 (s, 1H), 7.73-7.72 (d,  $J=2.8$  Hz, 1H), 7.37-7.35 (m, 1H), 7.28-7.26 (m, 1H);  $^{13}\text{C NMR}$  (101 MHz, DMSO- $d_6$ )  $\delta$  149.4, 137.5, 133.2, 129.3, 129.0, 127.4, 124.0;

LCMS (ESI) Calcd for  $\text{C}_7\text{H}_5\text{NOS}$   $[\text{M}+\text{H}]^+$ , 152.0922; found, 152.0898

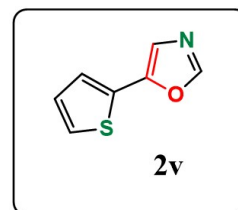

xxiii) **5-(1H-indol-2-yl)oxazole (2w)**

Yield: 143 mg, 78%; Colourless solid; m.p. 110-112 °C;

$^1\text{H NMR}$  (400 MHz, DMSO- $d_6$ )  $\delta$  12.03(s, 1H), 8.09 (s, 1H), 7.78 (d, 2H), 7.55(s, 1H), 7.46-7.42(t,  $J=6.8$  Hz, 1H), 6.98-6.95(m, 2H);  $^{13}\text{C NMR}$  (101 MHz, DMSO- $d_6$ )  $\delta$  167.1, 137.5, 129.3, 128.7, 124.0, 122.5, 121.5, 120.1, 118.8, 112.6, 101.1;

LCMS (ESI) Calcd for  $\text{C}_{11}\text{H}_8\text{N}_2\text{O}$   $[\text{M}+\text{H}]^+$ , 185.0637; found, 185.0629

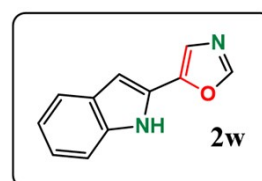

xxiv) **5-(pyridin-3-yl)oxazole (2x)**

Yield: 103 mg, 71%; Colourless solid; m.p. 148-150 °C;

$^1\text{H NMR}$  (400 MHz, DMSO- $d_6$ )  $\delta$  9.06 (s, 1H), 8.78-8.77 (t,  $J=3.2$  Hz, 1H), 8.25(s, 1H), 7.59-7.57(t,  $J=2.4$  Hz, 1H), 7.13-7.09 (m, 2H);  $^{13}\text{C NMR}$  (101 MHz,  $\text{CDCl}_3$ )  $\delta$  151.3, 150.4, 148.2, 147.0, 134.0, 133.1, 124.7, 121.0;

LCMS (ESI) Calcd for  $\text{C}_8\text{H}_6\text{N}_2\text{O}$   $[\text{M}+\text{H}]^+$ , 147.0480; found, 147.0472.

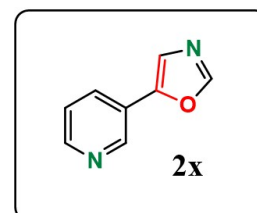

xxv) **5-phenyl-4-propyloxazole (2y)**

Yield: 140 mg, 75%; Colourless solid; m.p. 124-126 °C;

$^1\text{H NMR}$  (400 MHz, DMSO- $d_6$ ):  $\delta$  8.35 (s, 1H), 7.93 (d,  $J=8.0$  Hz, 2H), 7.60 (t,  $J=2.0$  Hz, 2H), 7.49 (t,  $J=7.6$  Hz, 2H), 2.48 (t,  $J=7.2$  Hz, 1H), 1.63-1.57 (m, 2H), 0.82 (t,  $J=7.6$  Hz, 3H);

$^{13}\text{C NMR}$  (101 MHz, DMSO- $d_6$ )  $\delta$  148.4, 138.4, 129.8, 124.8, 124.2, 121.3, 36.2, 18.2, 13.6;

LCMS (ESI) Calcd for  $\text{C}_{12}\text{H}_{13}\text{NO}$   $[\text{M}+\text{H}]^+$ , 188.0997; found, 188.0990.

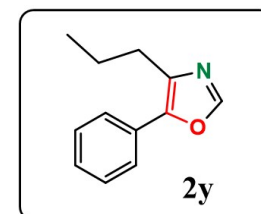

xxv) **4,5-dihydronaphtho[1,2-d]oxazole (2z)**

Yield: 138 mg, 81%; Colourless solid; m.p. 180-182 °C;

**<sup>1</sup>H-NMR** (400 MHz, DMSO-*d*<sub>6</sub>) δ 8.60 (s, 1H), 8.32 (dd, *J* = 7.1, 1.9 Hz, 2H), 8.00-7.97 (m, 2H), 2.99 (t, *J* = 7.9 Hz, 2H), 2.84 (t, *J* = 7.8 Hz, 2H);

**<sup>13</sup>C-NMR** (101 MHz, DMSO-*d*<sub>6</sub>) δ 151.1, 138.0, 134.0, 130.1, 128.9, 127.9, 126.4, 124.9, 122.3, 35.0, 27.6;

LCMS (ESI) Calcd for C<sub>11</sub>H<sub>9</sub>NO [M+H]<sup>+</sup>, 171.0684; found, 171.05.

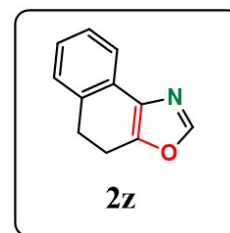

xxv) **8H-indeno[1,2-d]oxazole (2aa)**

Yield: 119 mg, 76%; Colourless solid; m.p. 164-166 °C;

**<sup>1</sup>H-NMR** (400 MHz, DMSO-*d*<sub>6</sub>) δ 8.60 (s, 1H), 7.83-7.74 (m, 3H), 7.56 (dd, *J* = 8.5, 2.2 Hz, 1H), 3.83 (s, 2H);

**<sup>13</sup>C NMR** (101 MHz, DMSO-*d*<sub>6</sub>) δ 150.4, 138.4, 137.0, 128.1, 125.9, 125.3, 125.1, 121.9, 36.1;

LCMS (ESI) Calcd for C<sub>10</sub>H<sub>7</sub>NO [M+H]<sup>+</sup>, 158.0528; found, 158.01.

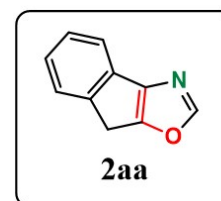

xxvi) **5-(4-bromophenyl)oxazole (2g-d)**

Yield: 70 mg, 63%; Colourless solid; m.p. 98-102 °C;

**<sup>1</sup>H NMR** (400 MHz, DMSO-*d*<sub>6</sub>): δ 7.72 (s, 1H), 7.30-7.28 (m, 4H);

**<sup>13</sup>C NMR** (101 MHz, DMSO-*d*<sub>6</sub>): δ 153.1, 149.1, 133.2, 124.7, 122.0, 121.0;

LCMS (ESI) Calcd for C<sub>9</sub>H<sub>5</sub>DBrNO [M+H]<sup>+</sup>, 224.9696; found, 224.9560

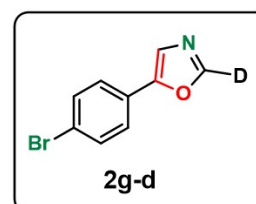

xxii) **2-(4-nitrophenyl)-2-oxoethyl acetate (3)<sup>4</sup>**

Yield: 207 mg, 92%; Colourless solid; m.p. 120-122 °C;

**<sup>1</sup>H NMR** (400 MHz, CDCl<sub>3</sub>) δ 8.01 (d, *J* = 8.9 Hz, 2H), 6.92 (d, *J* = 9.0 Hz, 2H), 5.36 (s, 2H), 3.85 (s, 3H), 2.29 (s, 3H);

**<sup>13</sup>C NMR** (101 MHz, CDCl<sub>3</sub>) δ 165.7, 163.4, 131.6, 122.0, 113.5, 68.3, 55.3, 15.3;

LCMS(ESI) Calcd for C<sub>10</sub>H<sub>9</sub>NO<sub>5</sub> [M+H]<sup>+</sup>, 224.0481; found, 224.1209.

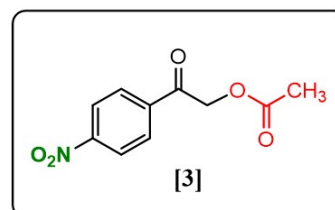

xxiii) (methylthio)methyl 4-methoxybenzoate (4a)

Yield: 157 mg, 74%; Colourless liquid;

$^1\text{H NMR}$  (400 MHz,  $\text{CDCl}_3$ )  $\delta$  8.01 (d,  $J = 8.9$  Hz, 2H), 6.92 (d,  $J = 9.0$  Hz, 2H), 5.36 (s, 2H), 3.85 (s, 3H), 2.29 (s, 3H);  $^{13}\text{C NMR}$  (101 MHz,  $\text{CDCl}_3$ )  $\delta$  165.7, 163.4, 131.6, 122.0, 113.5, 68.3, 55.3, 15.3; LCMS (ESI) Calcd for  $\text{C}_{10}\text{H}_{12}\text{O}_3\text{S}$   $[\text{M}+\text{H}]^+$ , 213.0580; found, 213.1457.

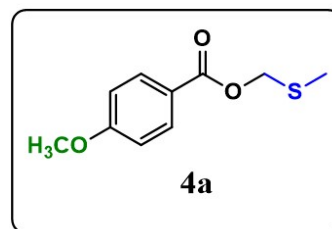

xxiii) (methylthio)methyl 4-(tert-butyl)benzoate (4b)

Yield: 191 mg, 80%; Colourless liquid;

$^1\text{H NMR}$  (400 MHz,  $\text{DMSO-d}_6$ )  $\delta$  7.90 (d,  $J = 8.6$  Hz, 2H), 7.54 (d,  $J = 8.6$  Hz, 2H), 5.40 (s, 2H), 2.25 (s, 3H), 1.28 (s, 9H);  $^{13}\text{C NMR}$  (101 MHz,  $\text{DMSO-d}_6$ )  $\delta$  165.3, 156.7, 129.2, 126.7, 125.7, 68.3, 34.9, 30.8, 14.7; LCMS (ESI) Calcd for  $\text{C}_{13}\text{H}_{18}\text{O}_2\text{S}$   $[\text{M}+\text{H}]^+$ , 239.1101; found, 239.10.

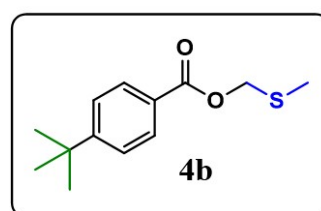

xxiii) methyl (E)-N-(2-(4-chlorophenyl)-2-oxoethyl)methanimidothioate (5)

Yield: 102 mg, 45%; Colourless solid;

$^1\text{H NMR}$  (400 MHz,  $\text{DMSO-d}_6$ )  $\delta$  7.95 (d,  $J = 8.6$  Hz, 2H), 7.60 (d,  $J = 8.6$  Hz, 2H), 7.01 (s, 1H), 2.80 (s, 3H), 2.68 (s, 2H);  $^{13}\text{C NMR}$  (101 MHz,  $\text{DMSO-d}_6$ )  $\delta$  199.3, 163.1, 134.7, 133.6, 129.0, 127.7, 65.4, 18.2; LCMS (ESI) Calcd for  $\text{C}_{10}\text{H}_{10}\text{ClNOS}$   $[\text{M}+\text{H}]^+$ , 227.0172; found, 227.10.

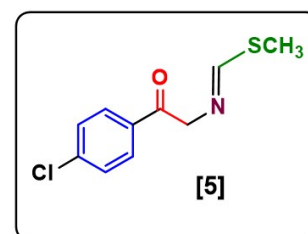

## 5. Copies of $^1\text{H}$ -NMR, $^{13}\text{C}$ -NMR and LCMS spectra of 5-substituted oxazole derivatives.

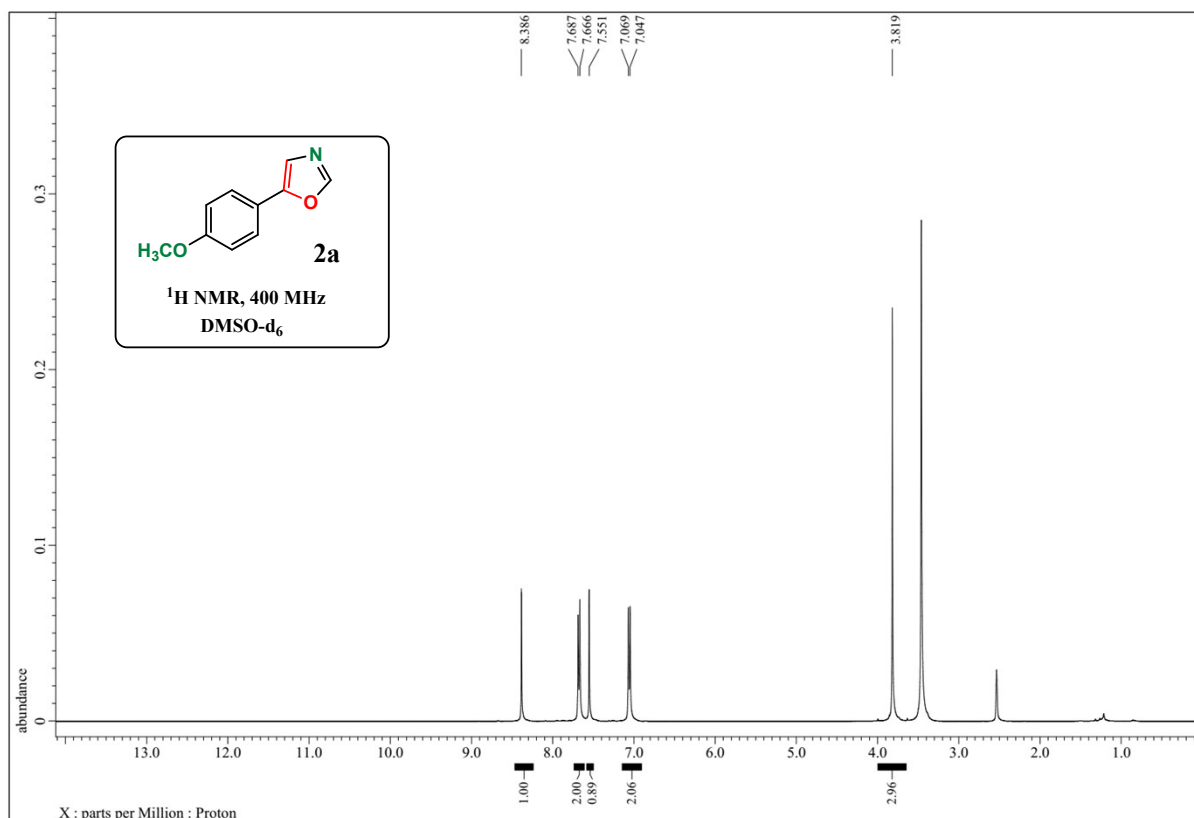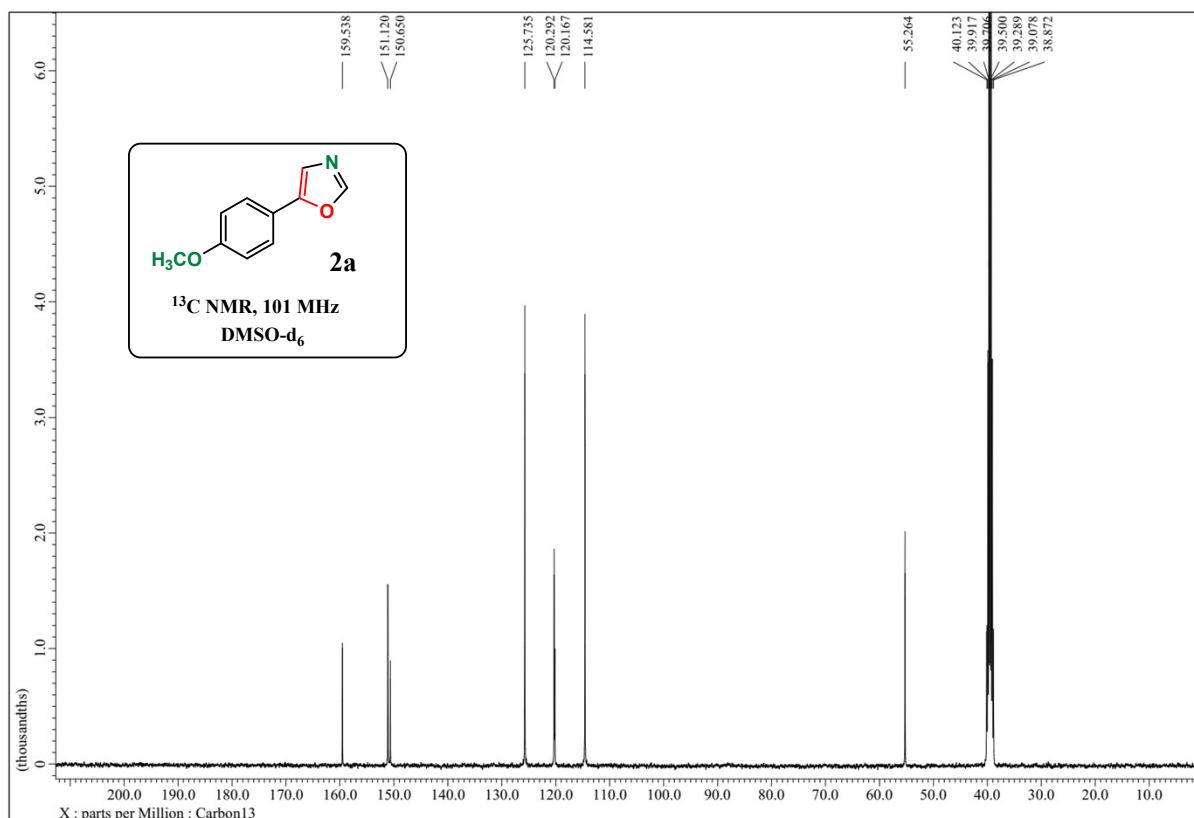

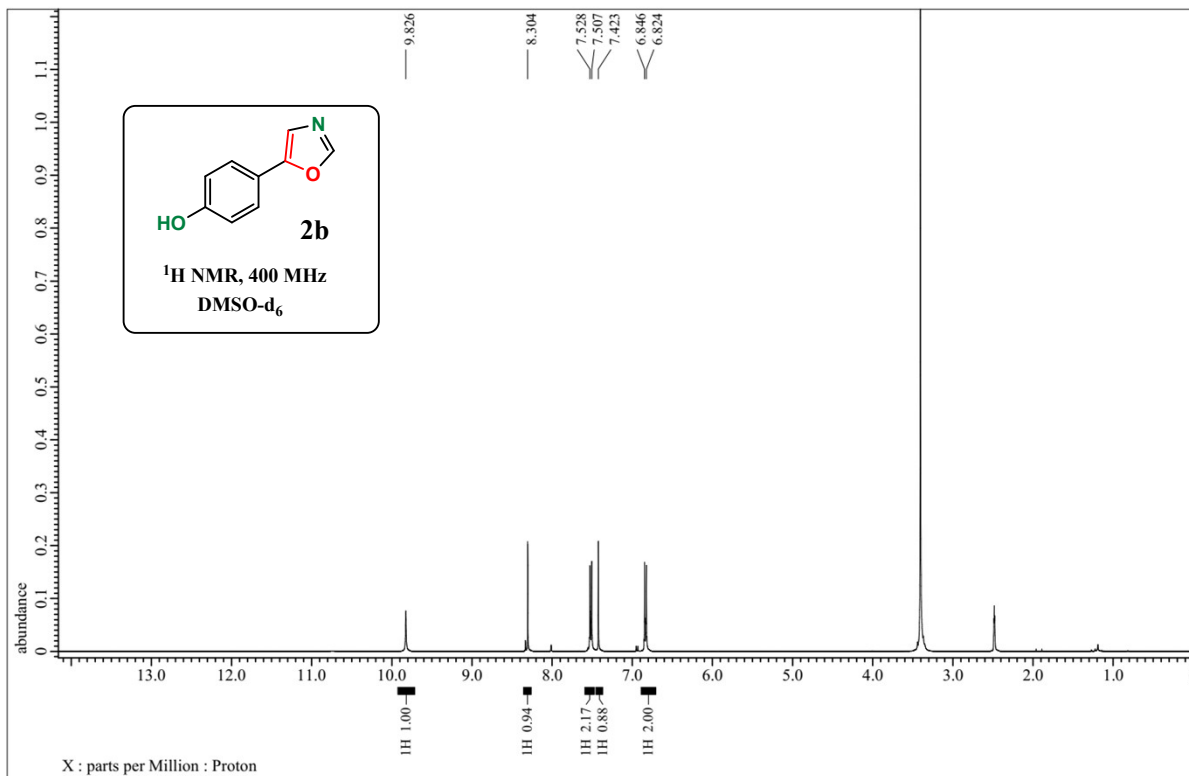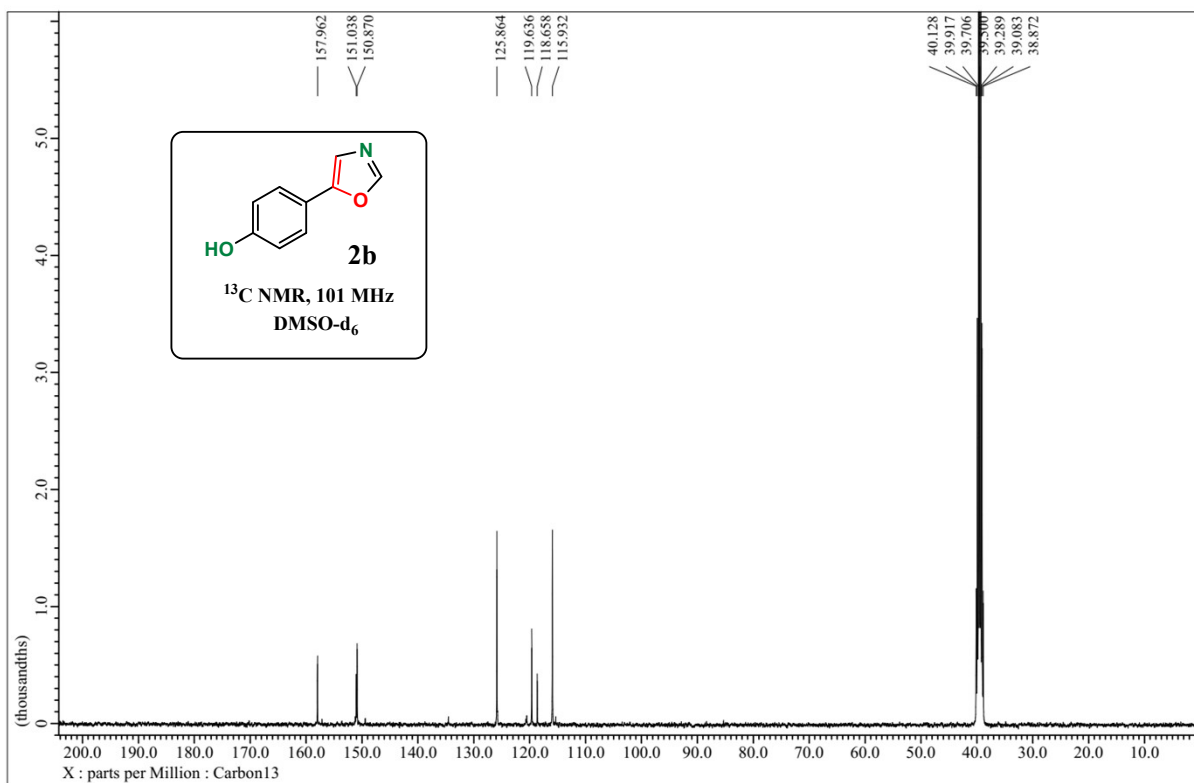

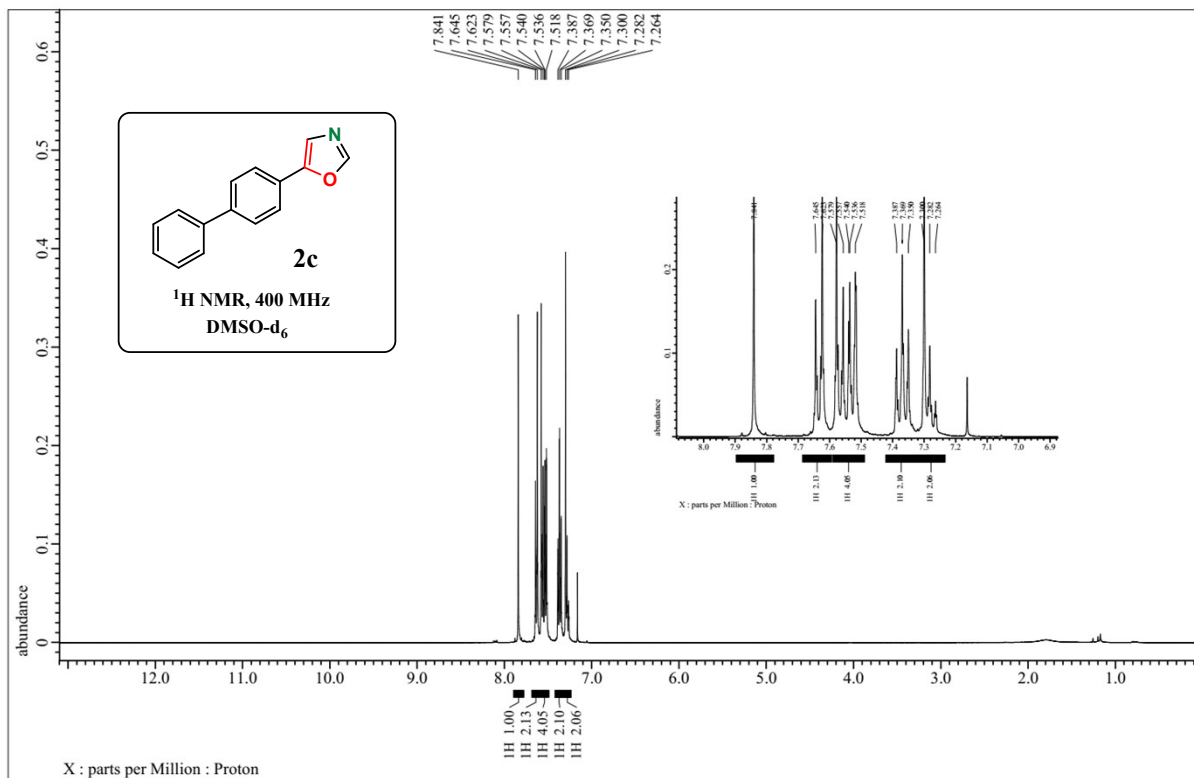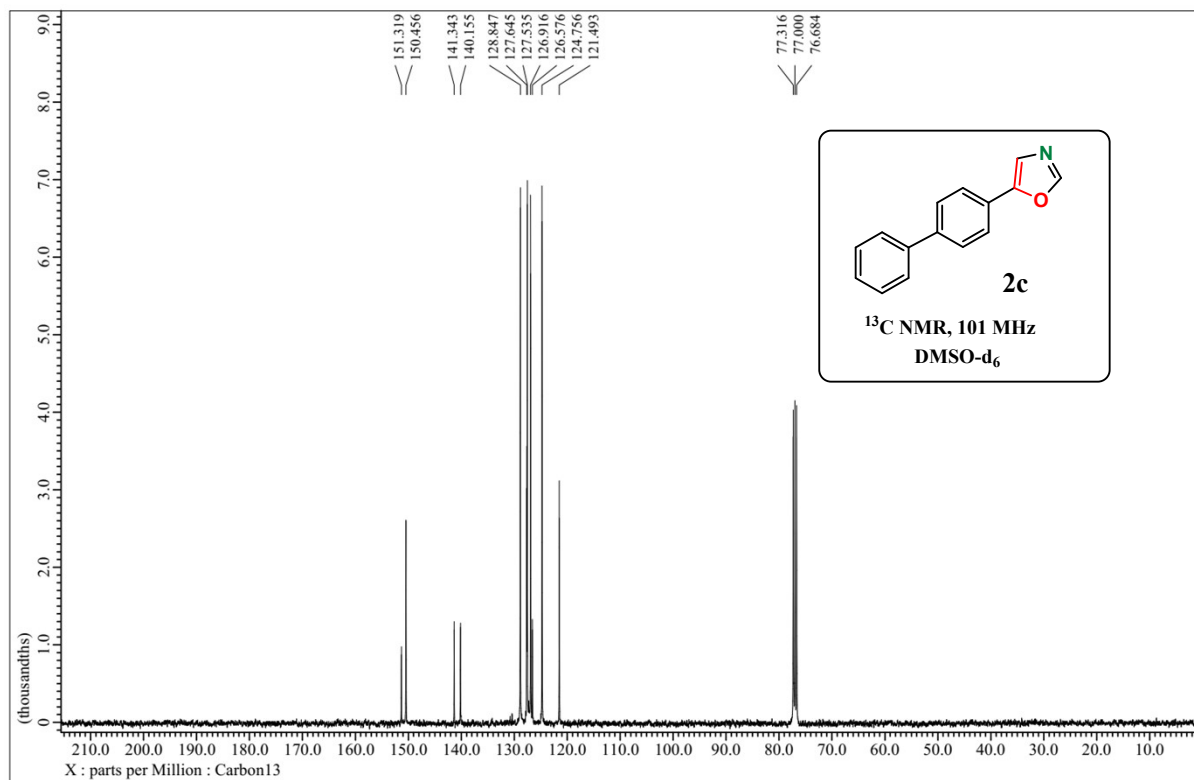



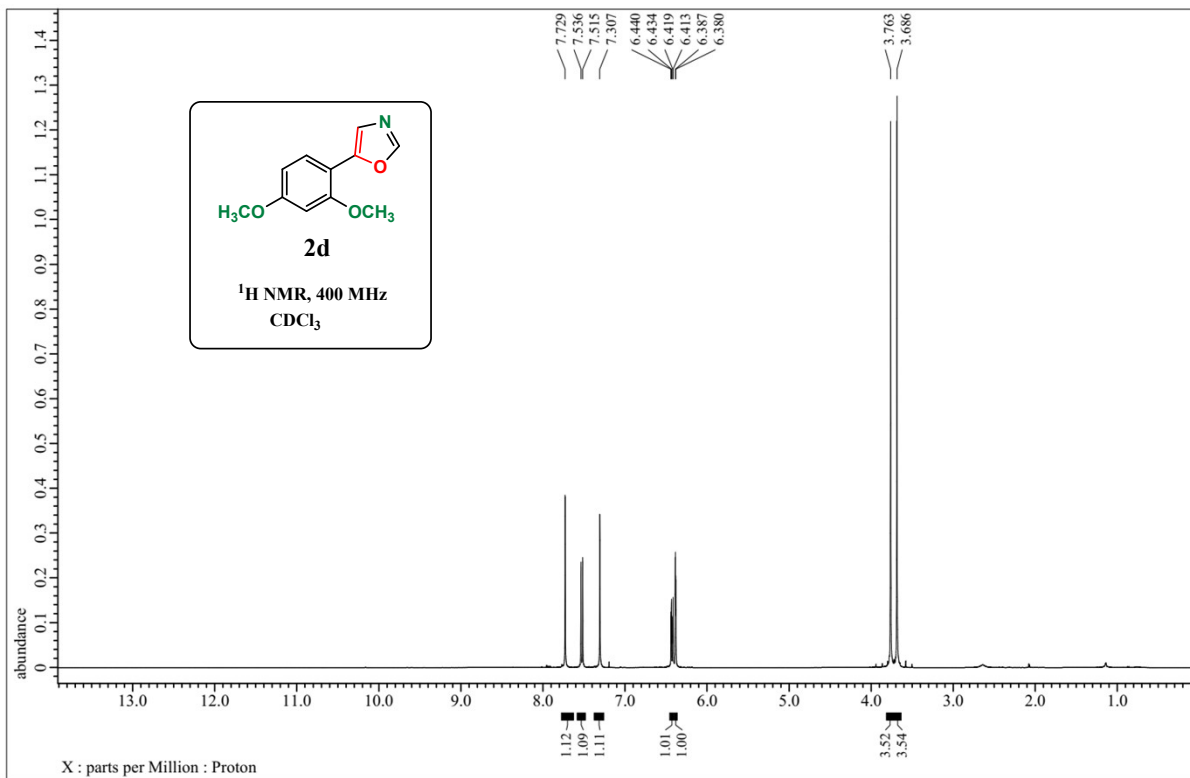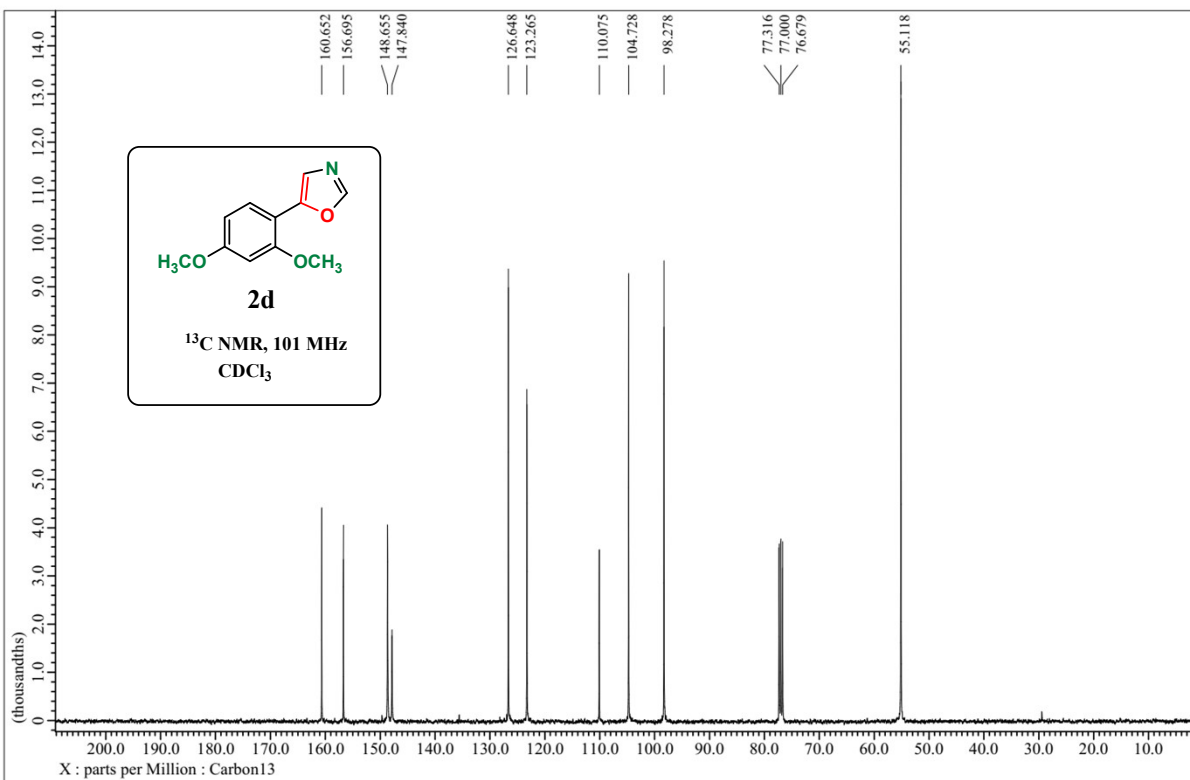

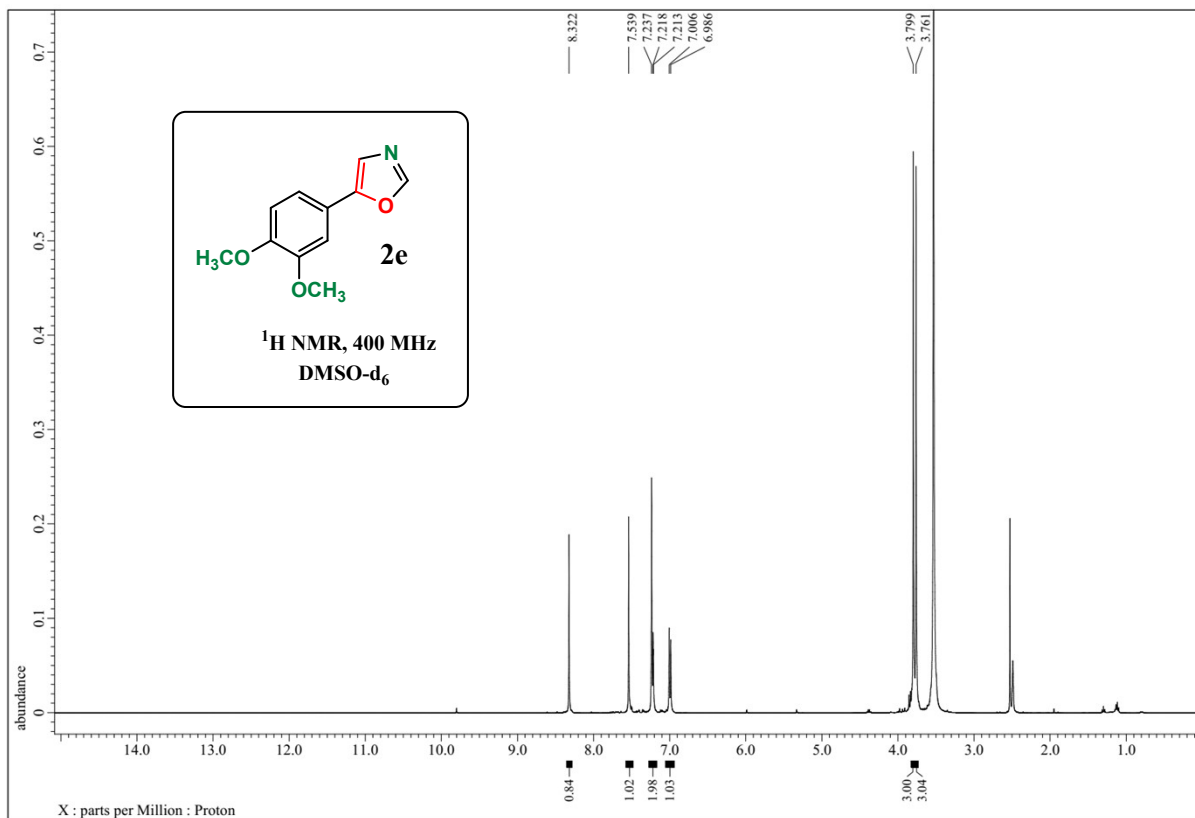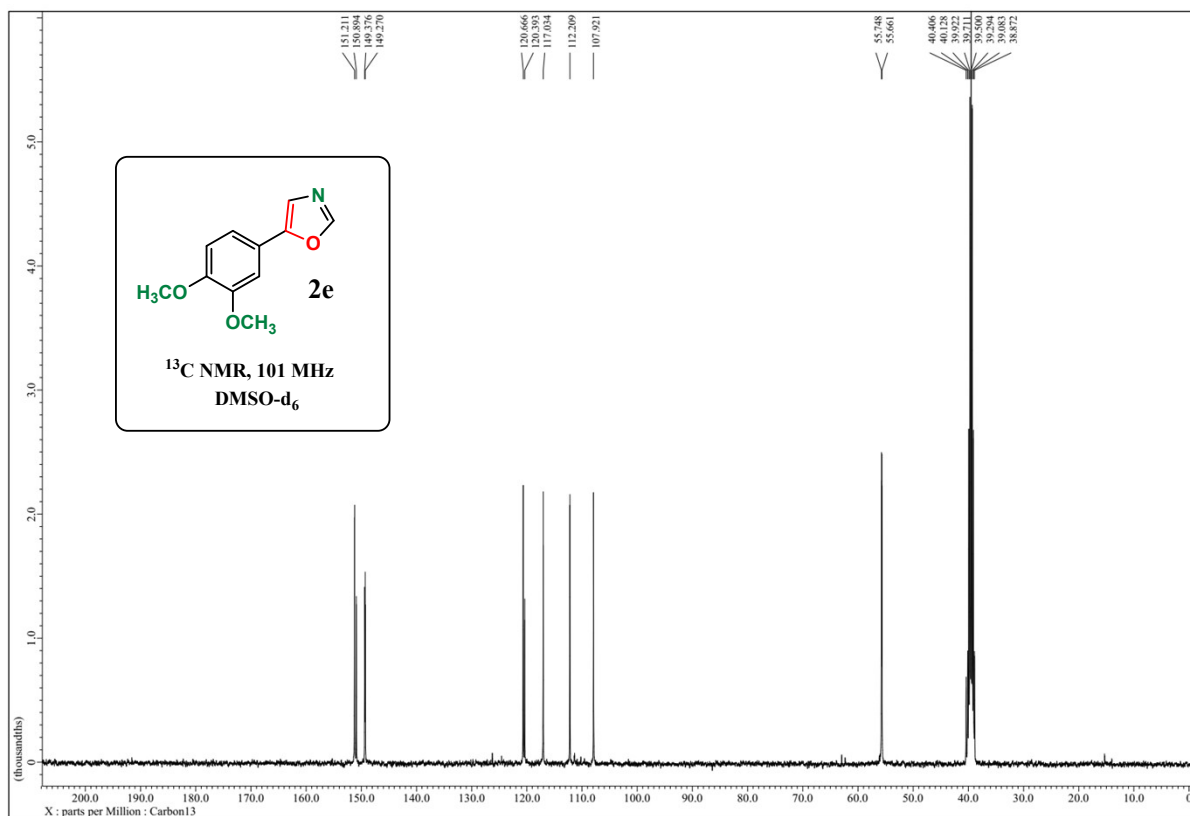

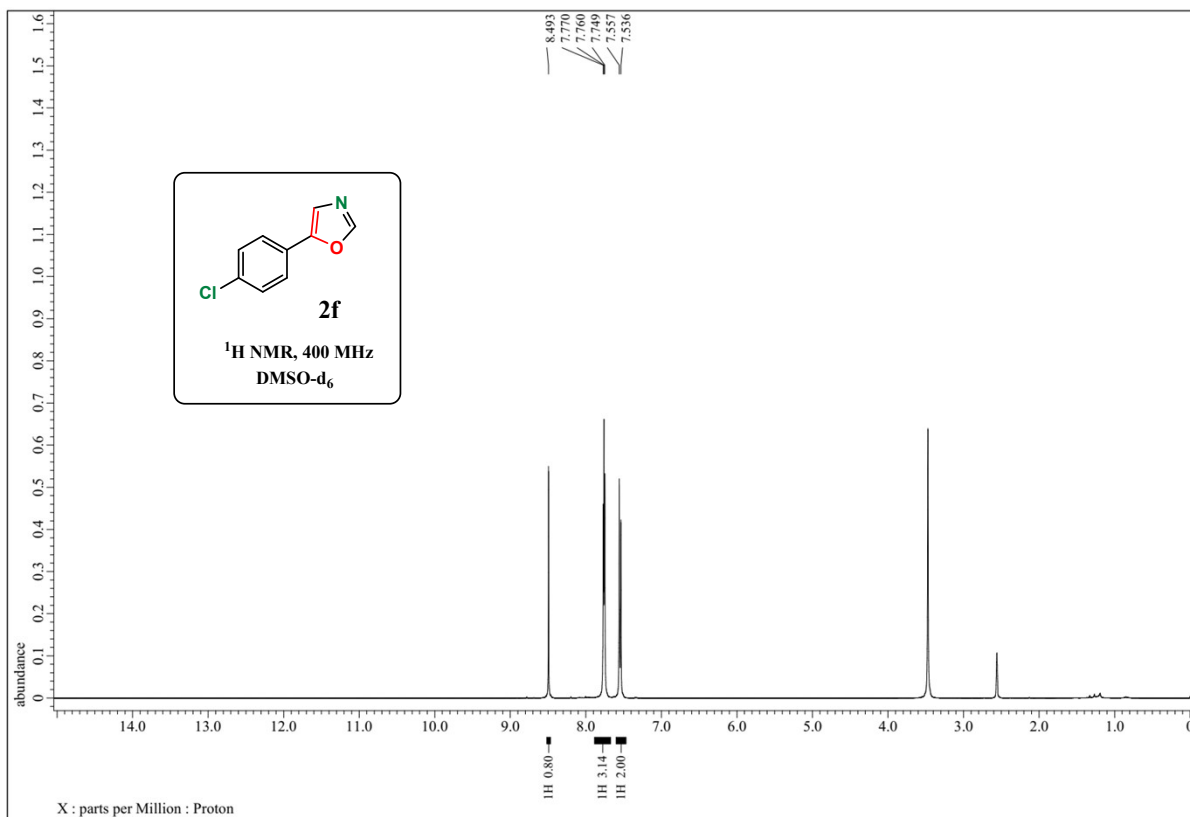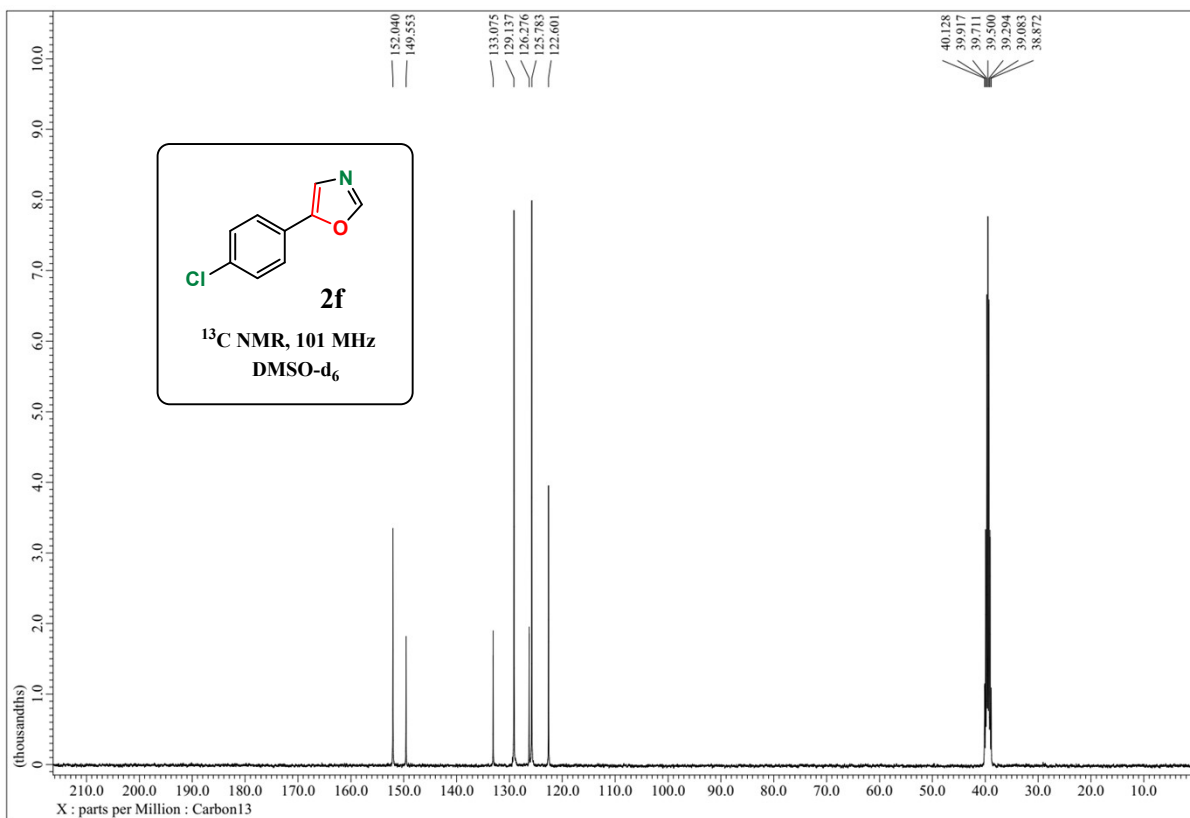

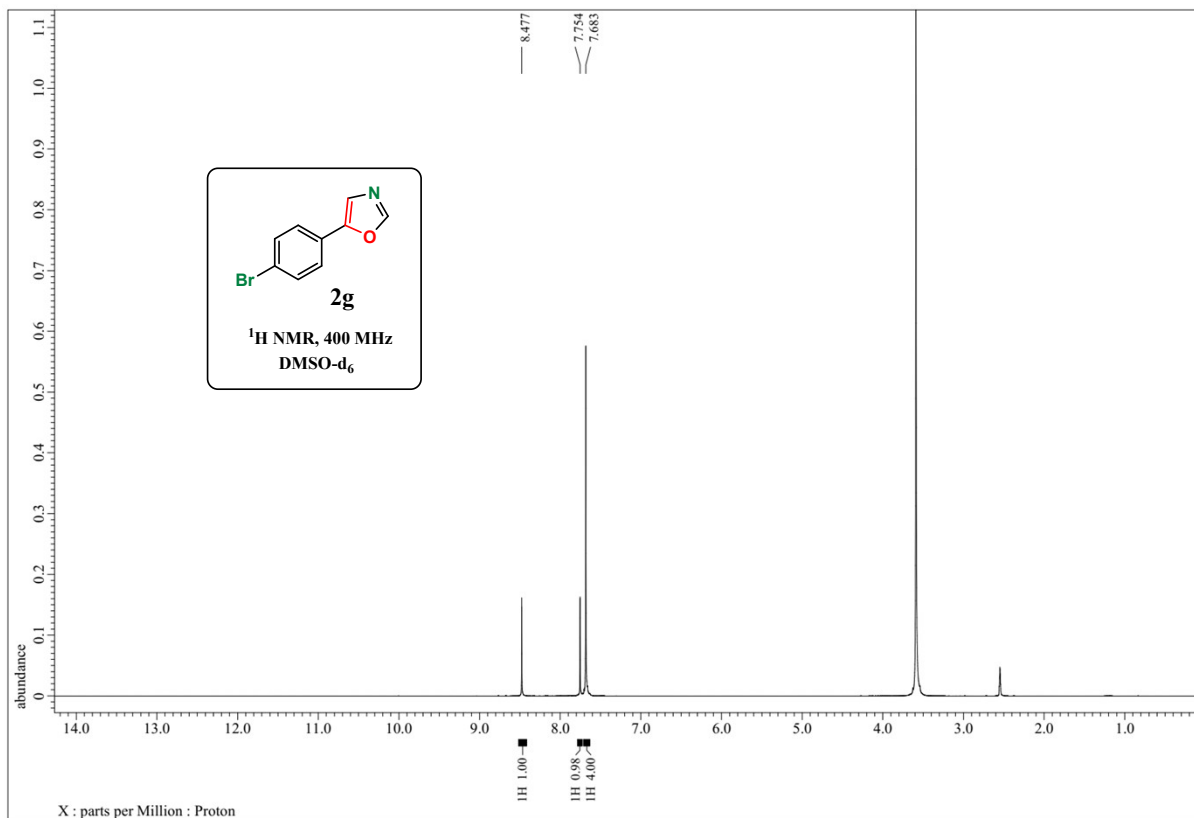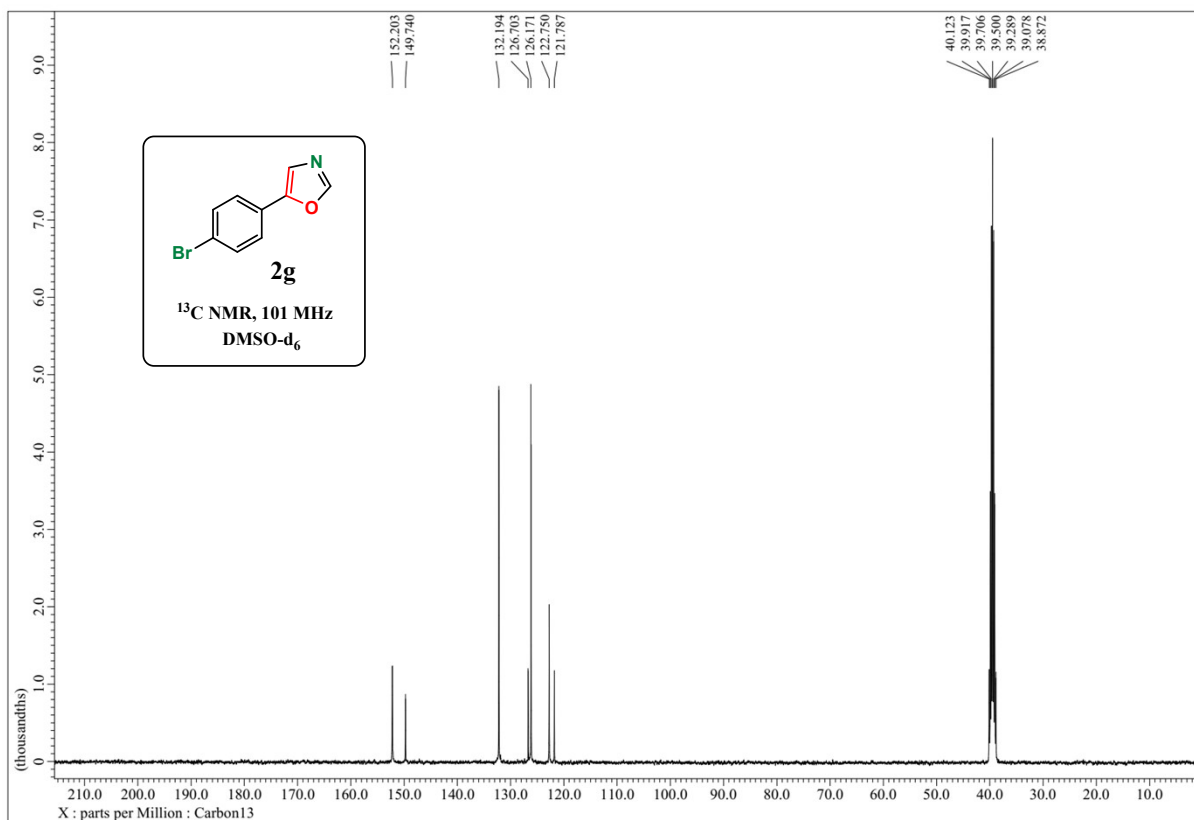

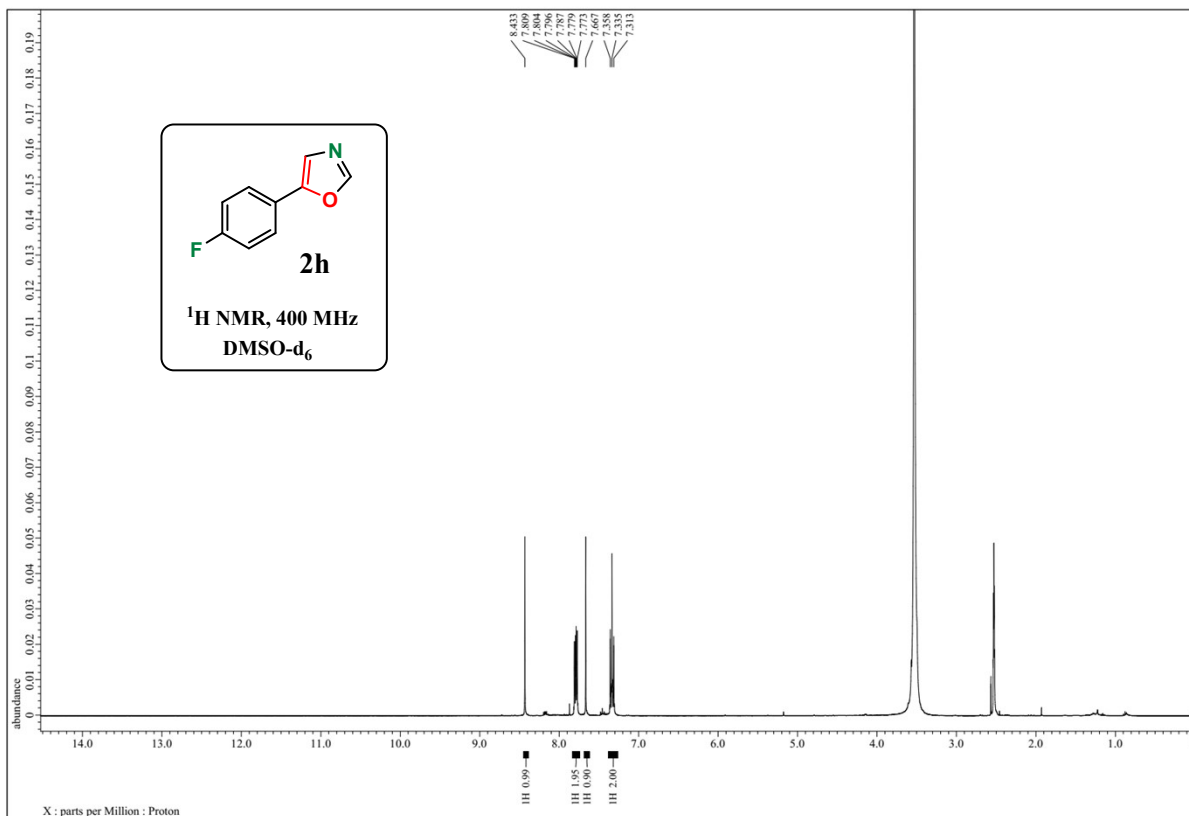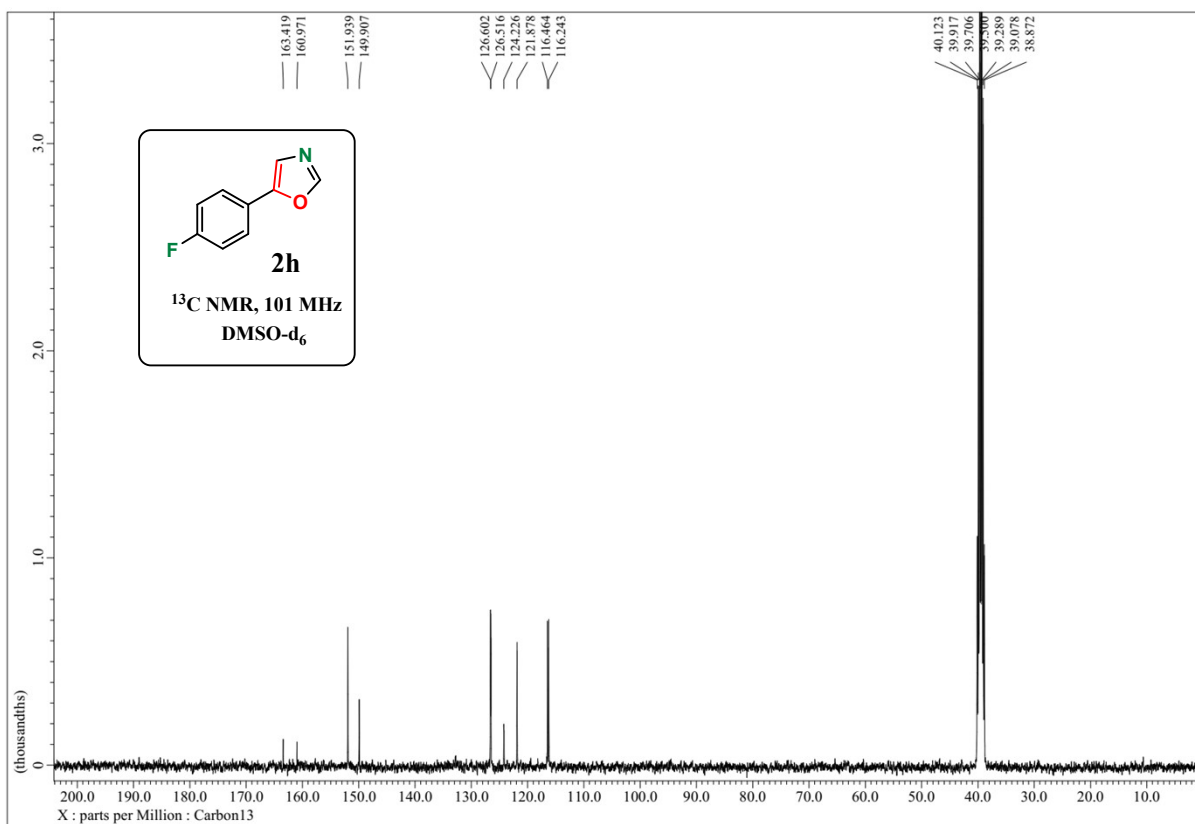

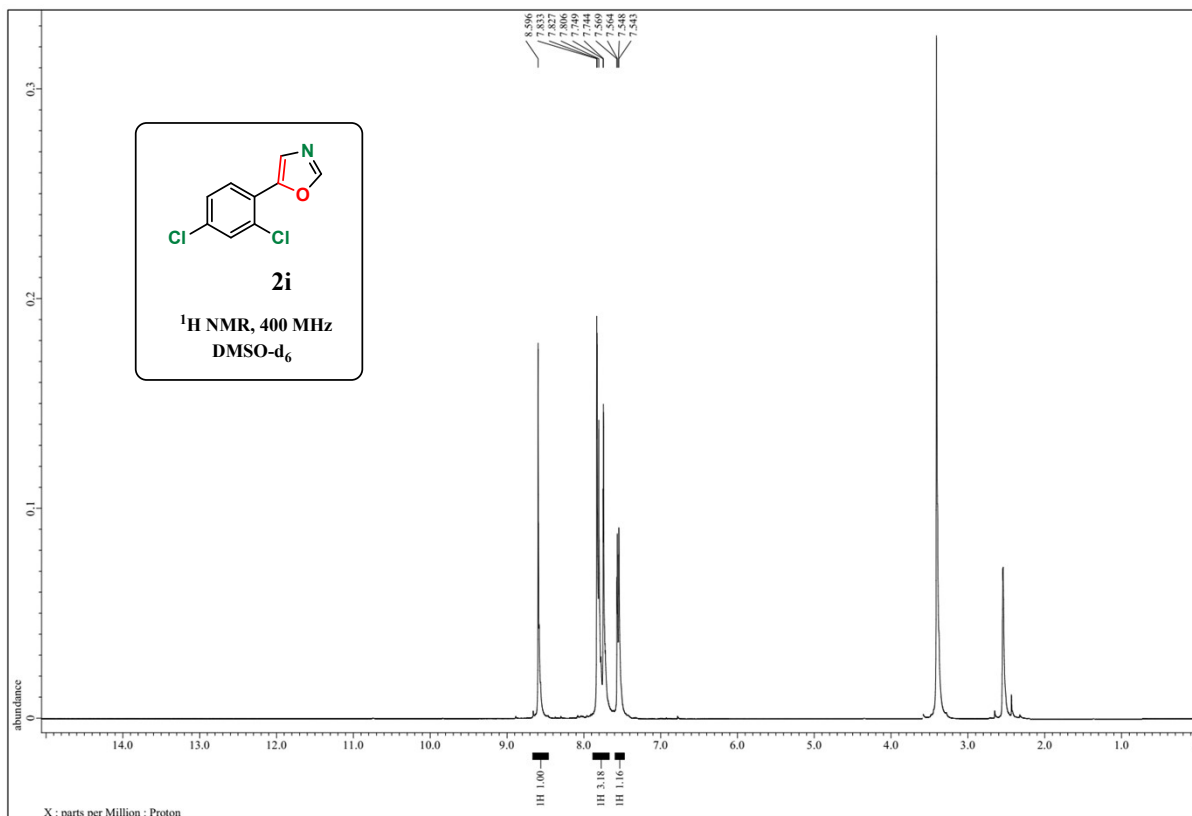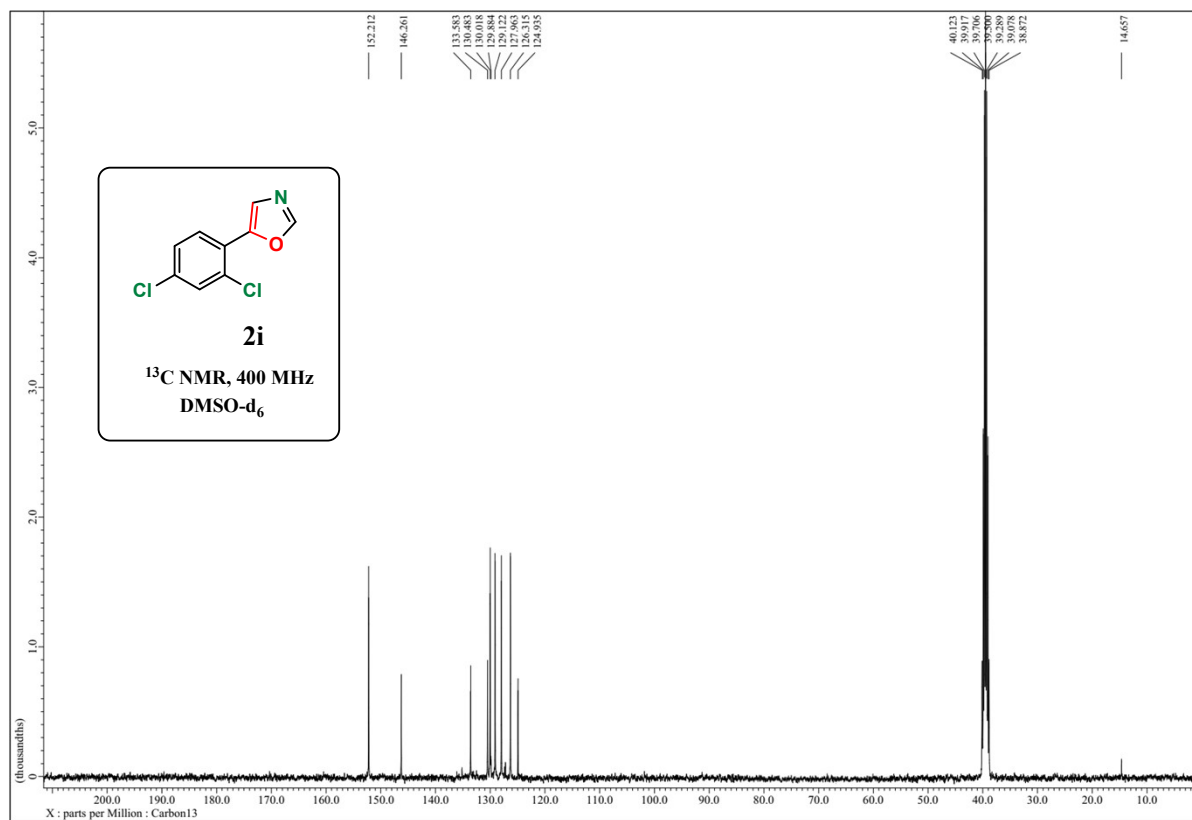

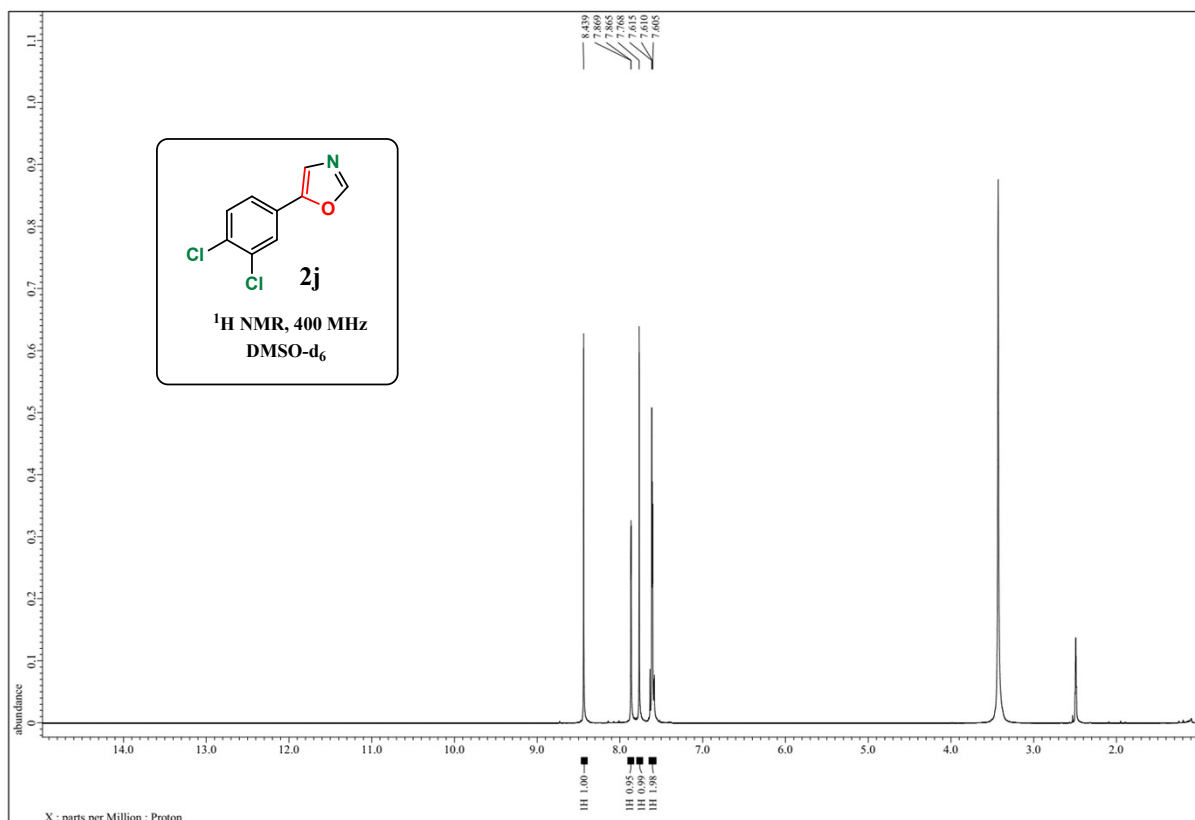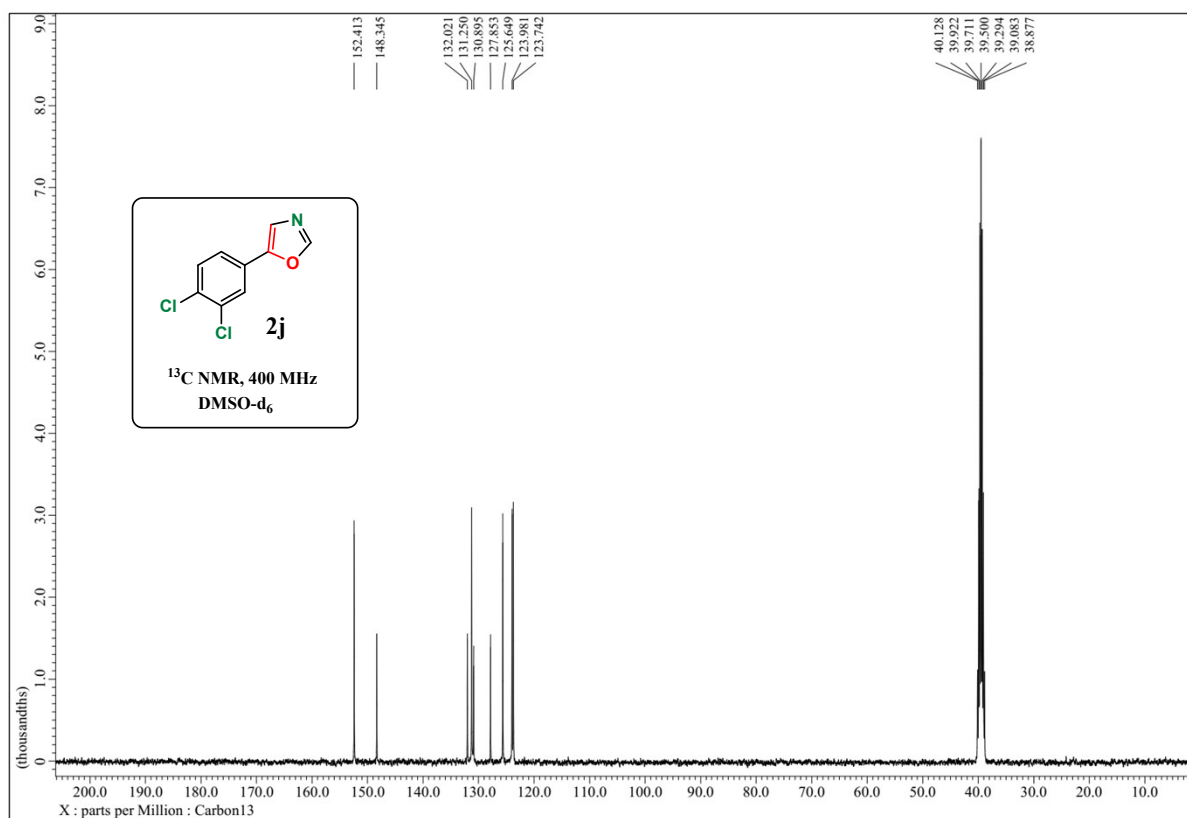

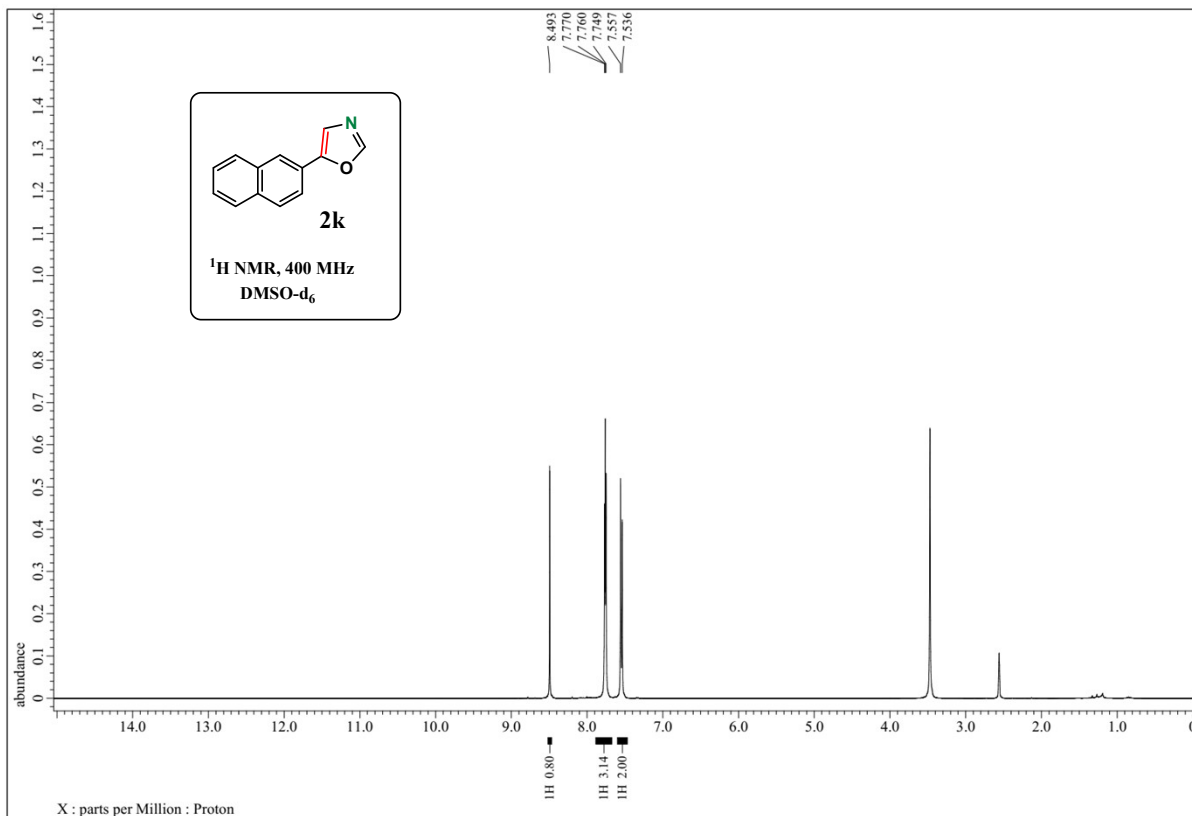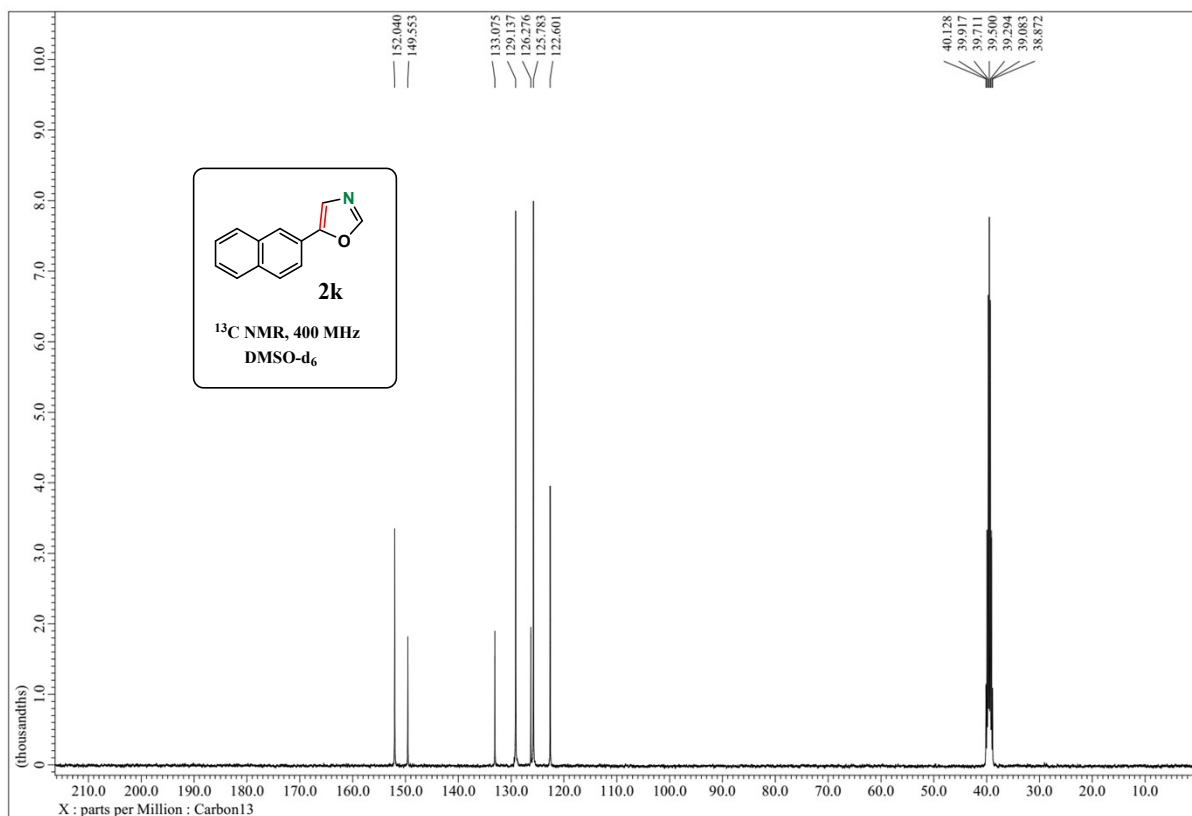



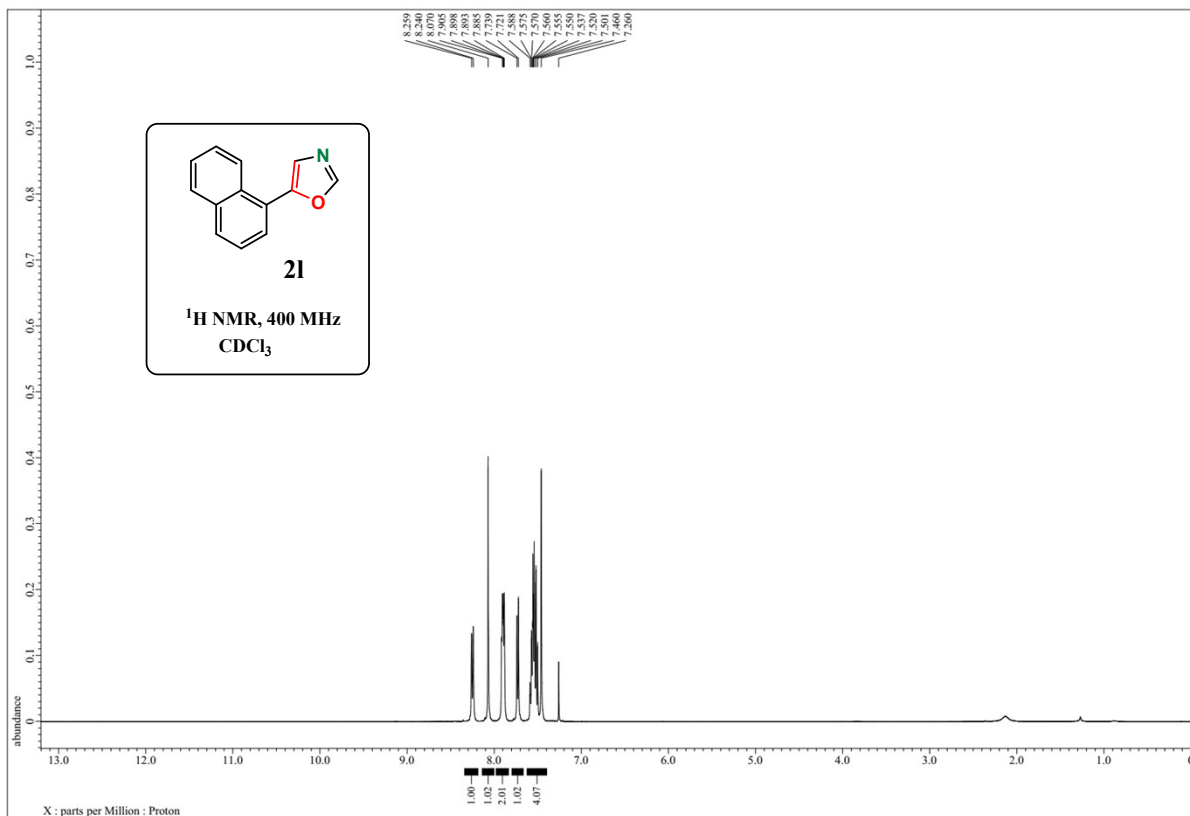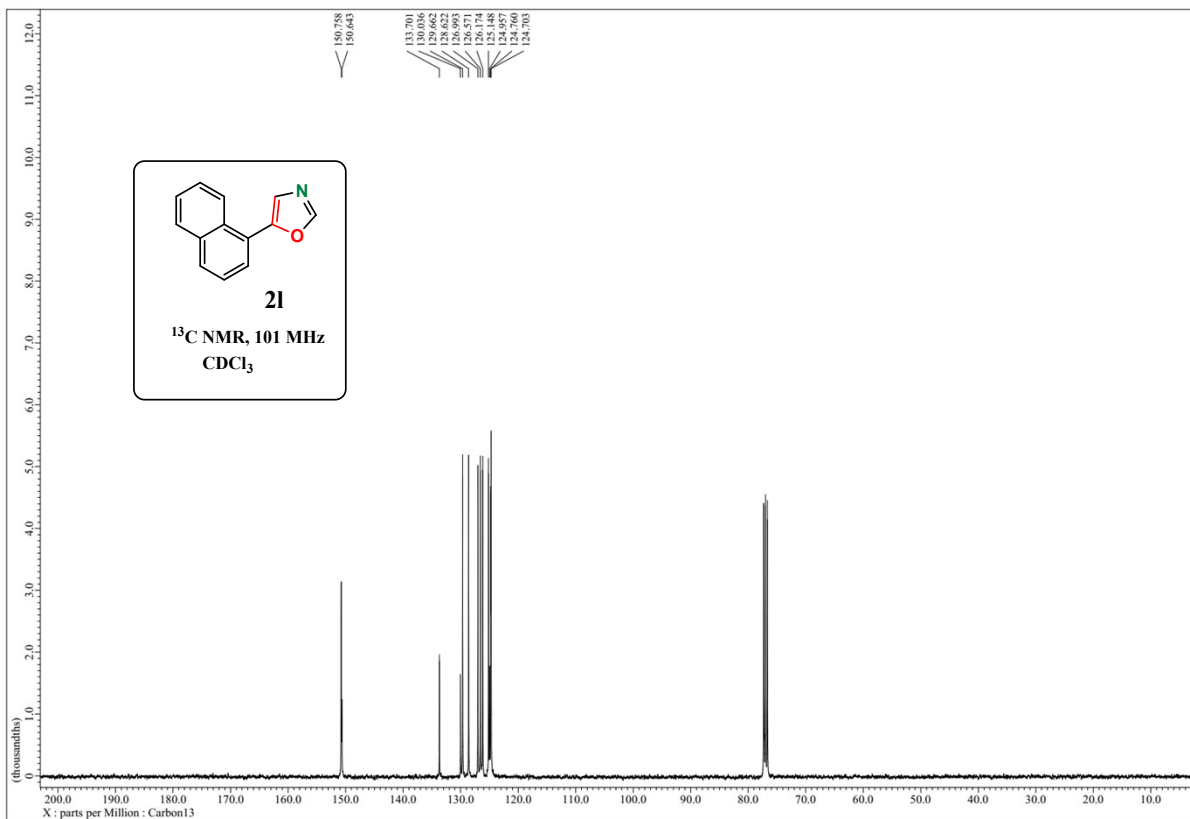

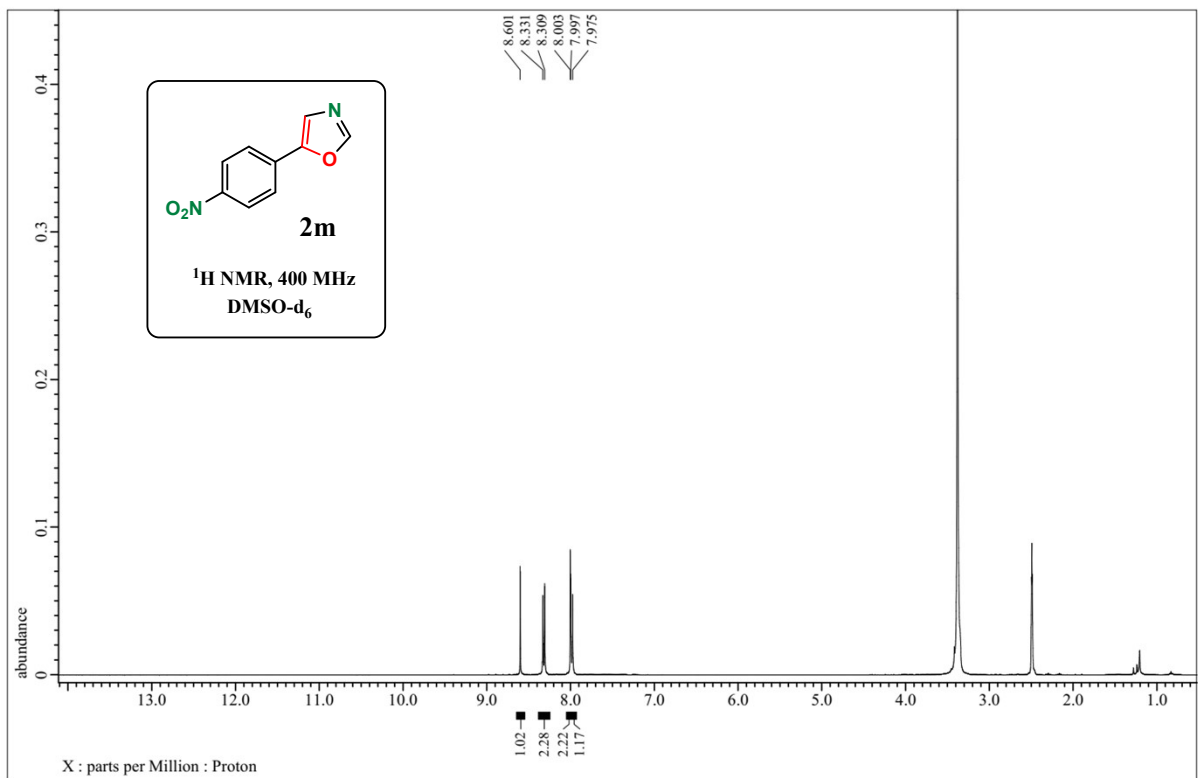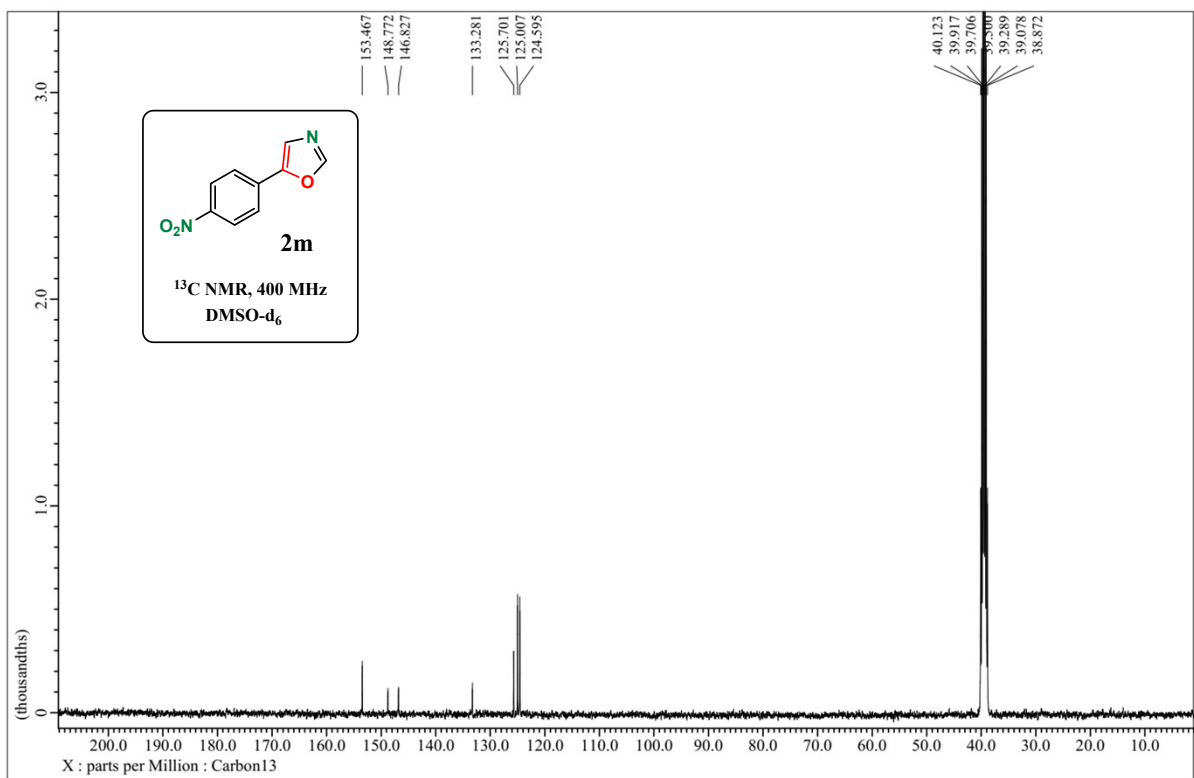

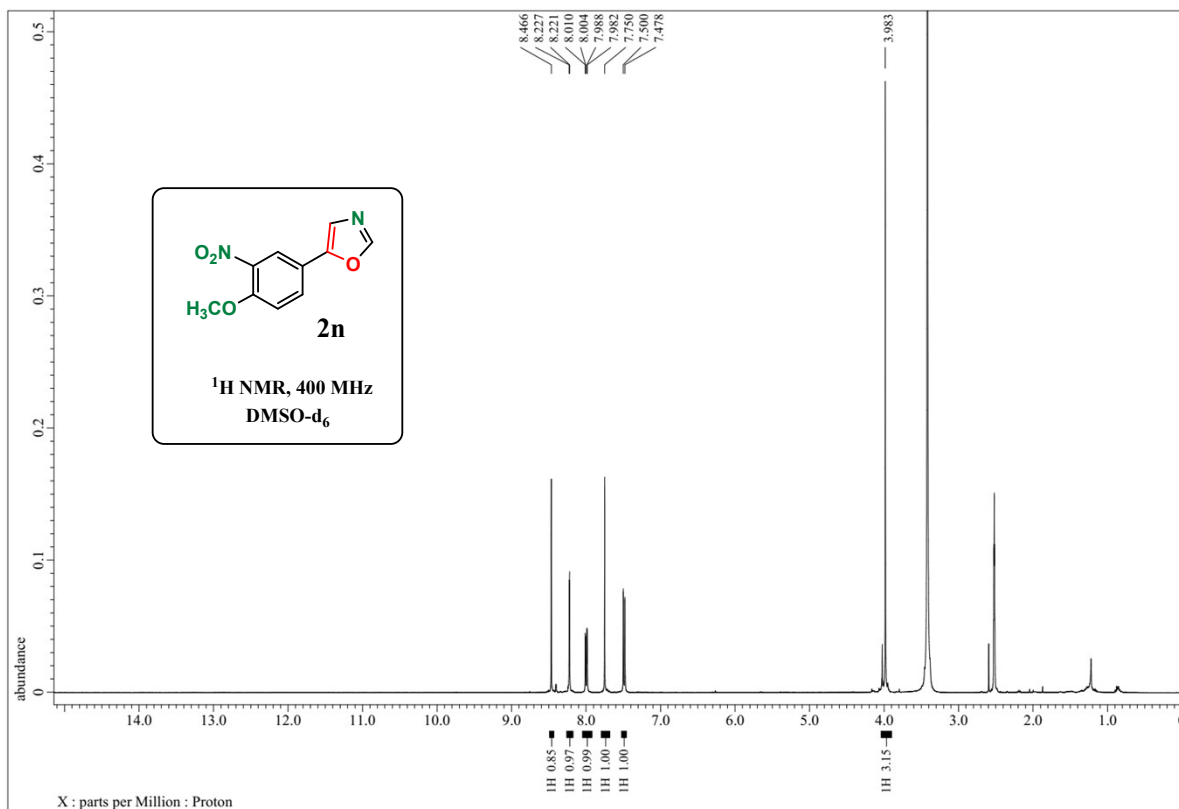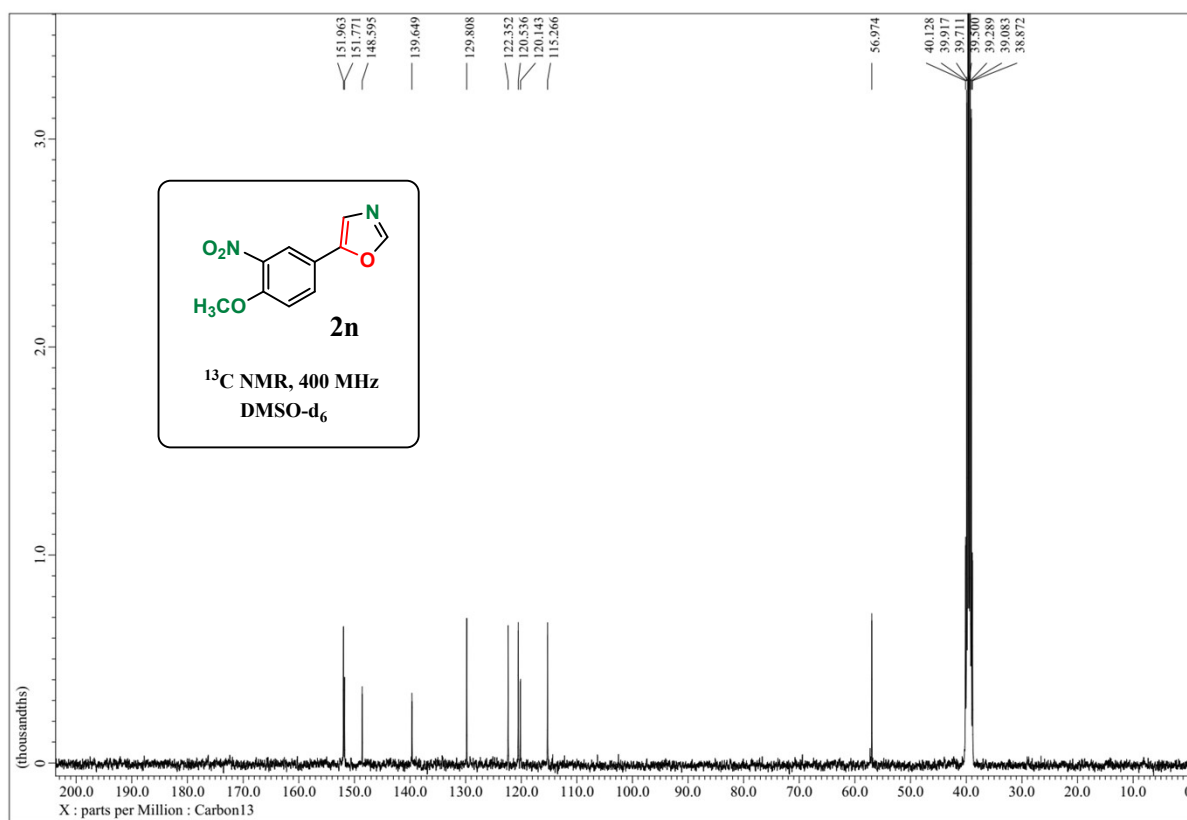

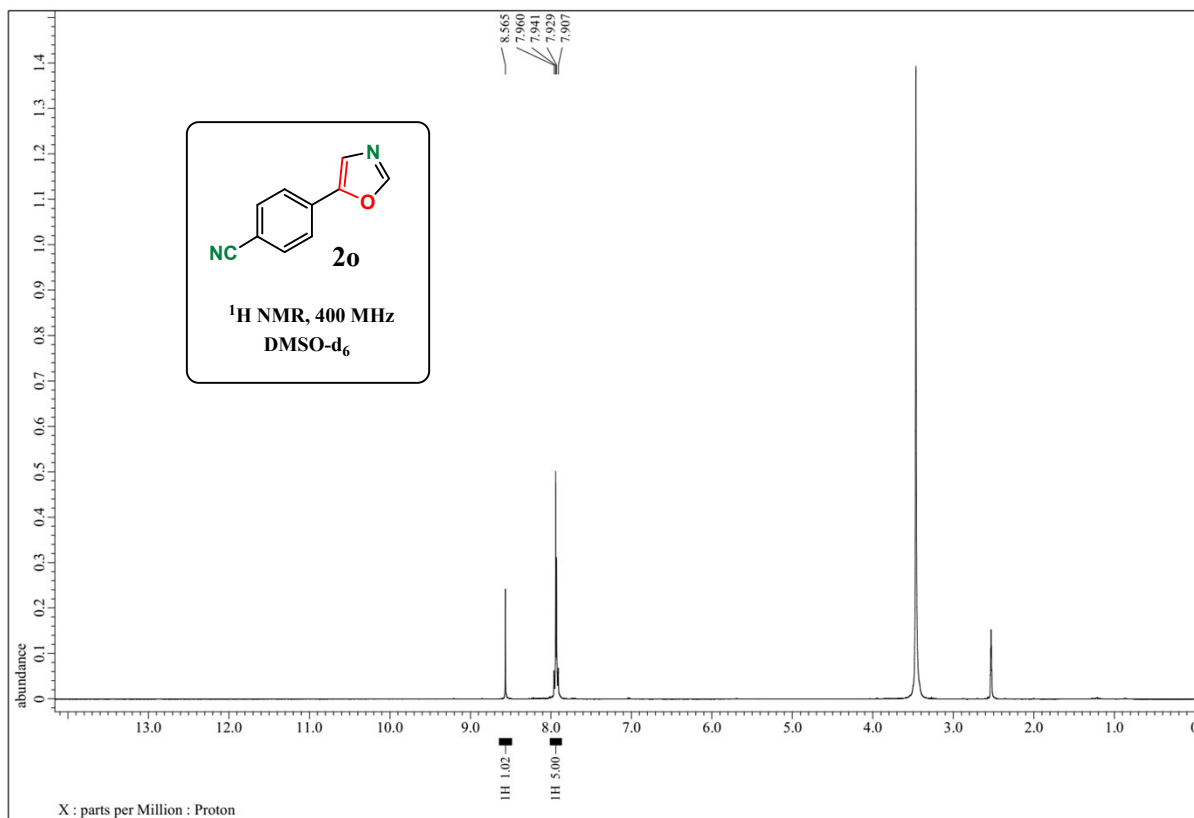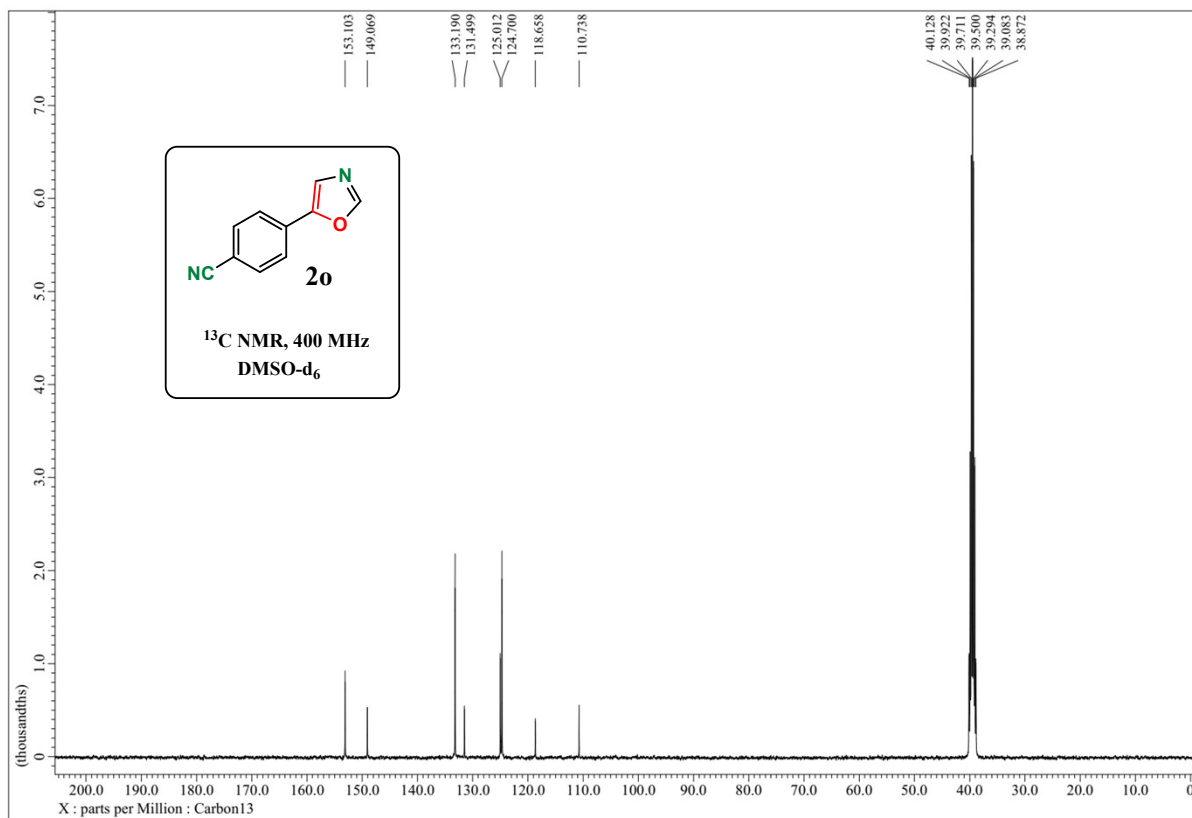

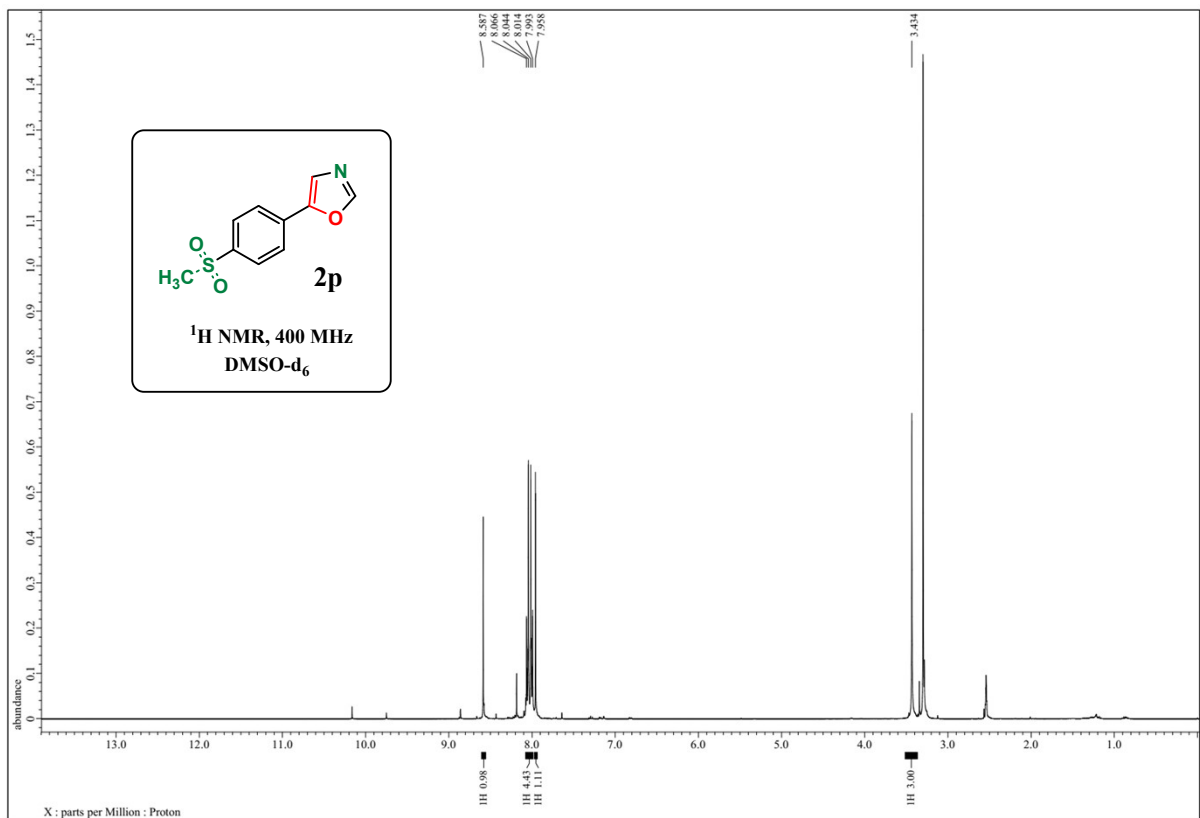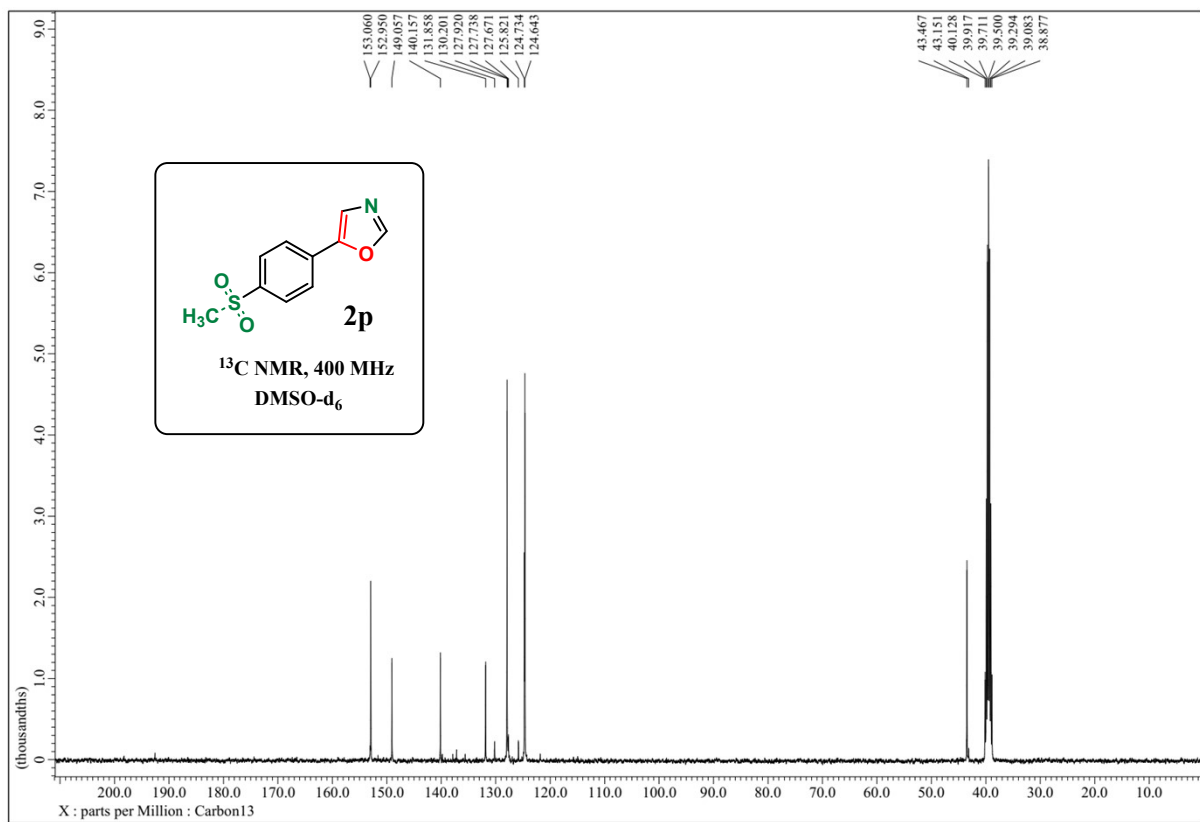

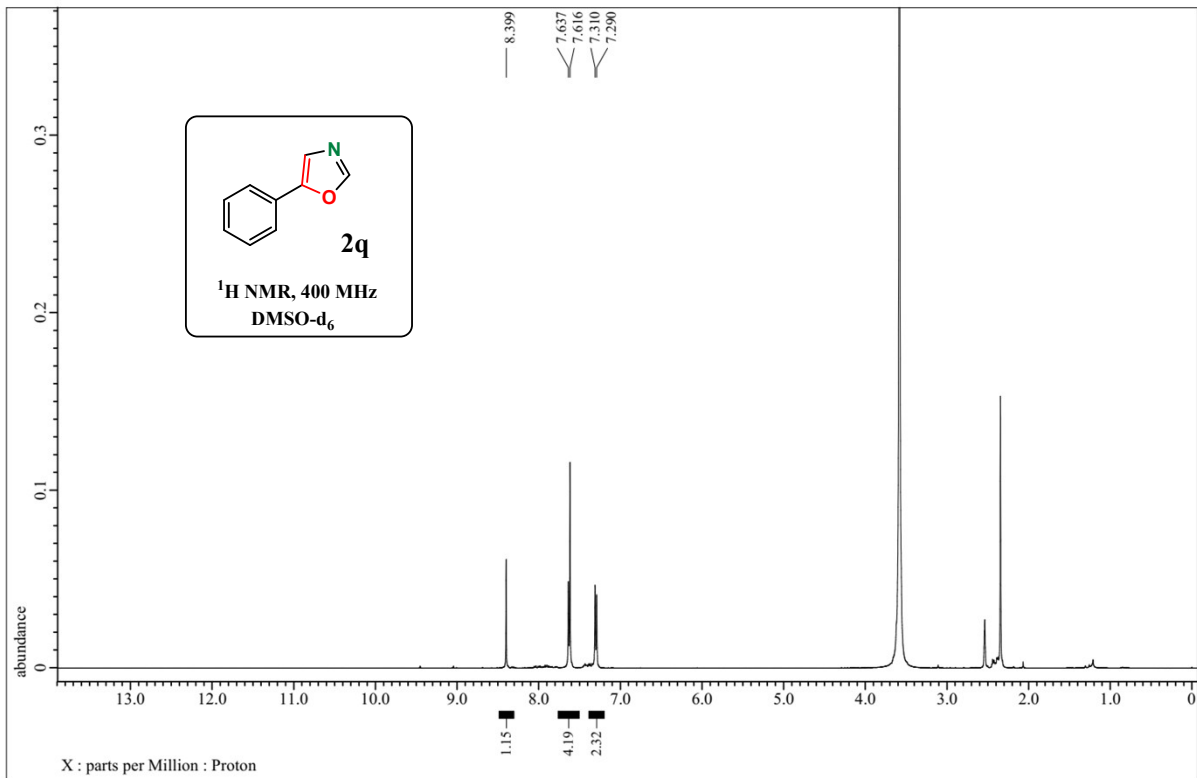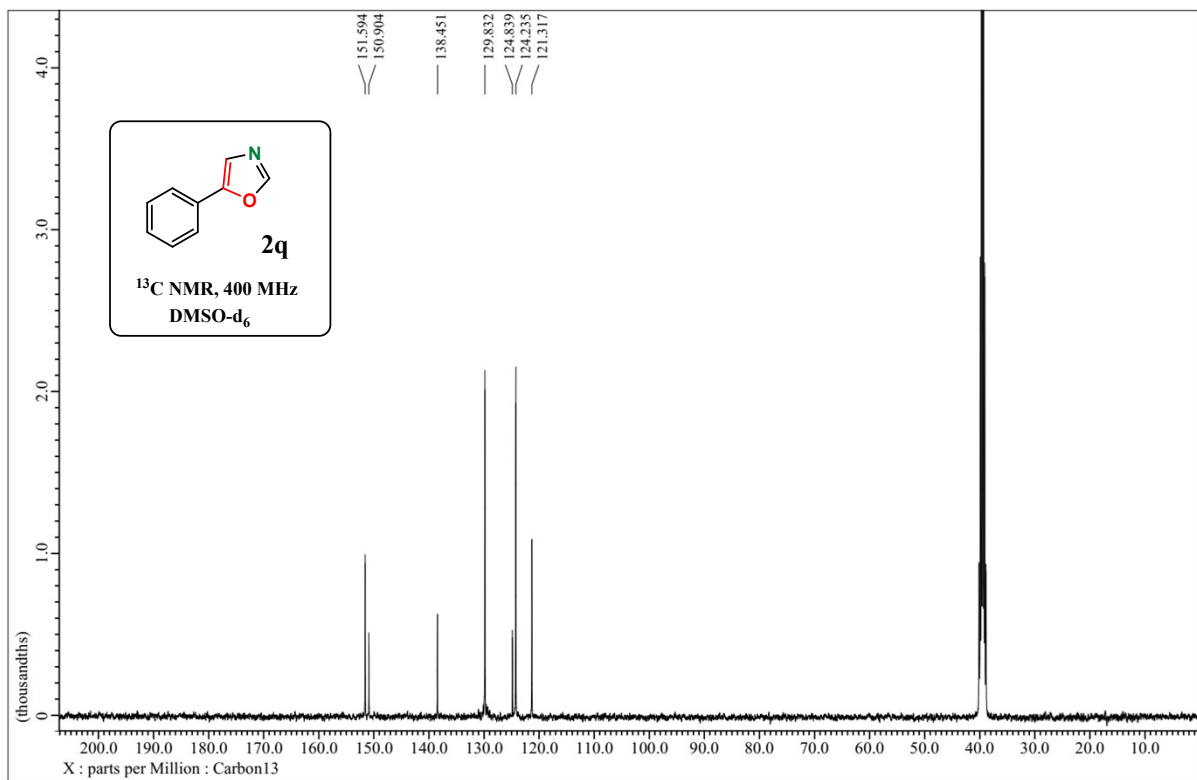

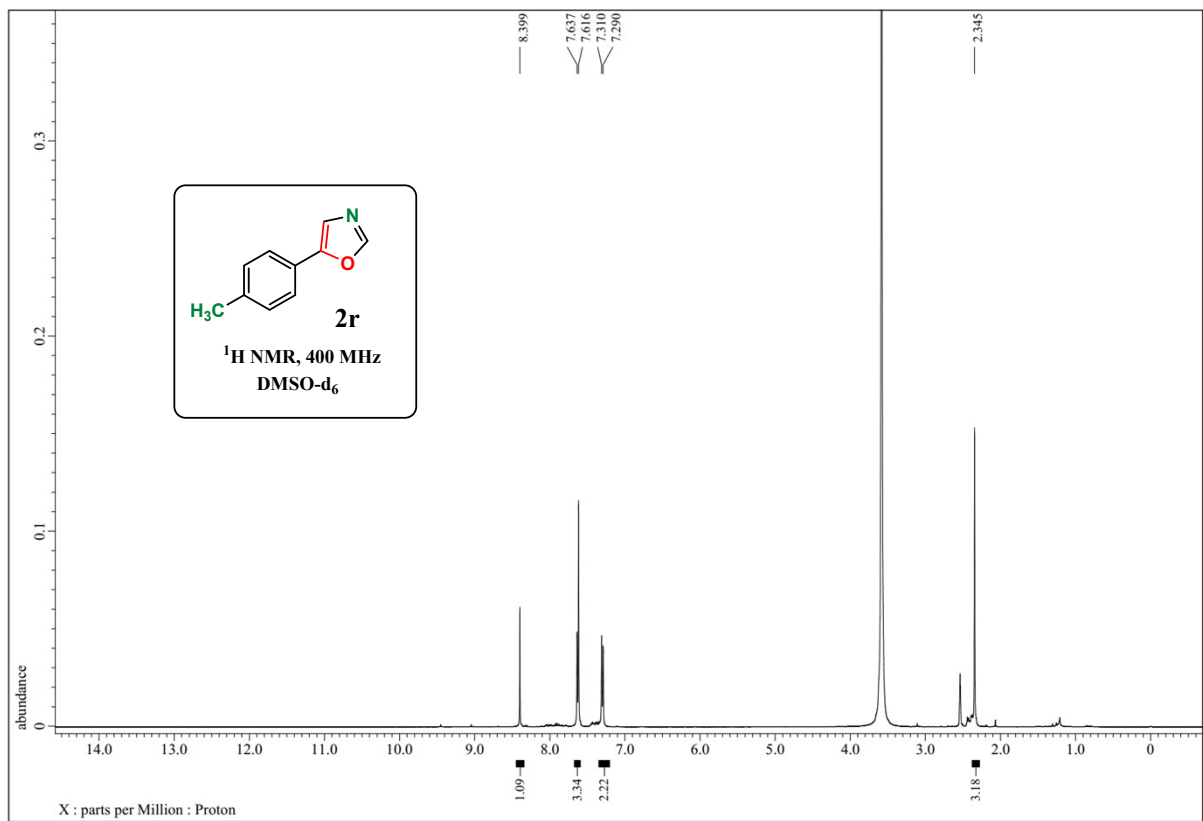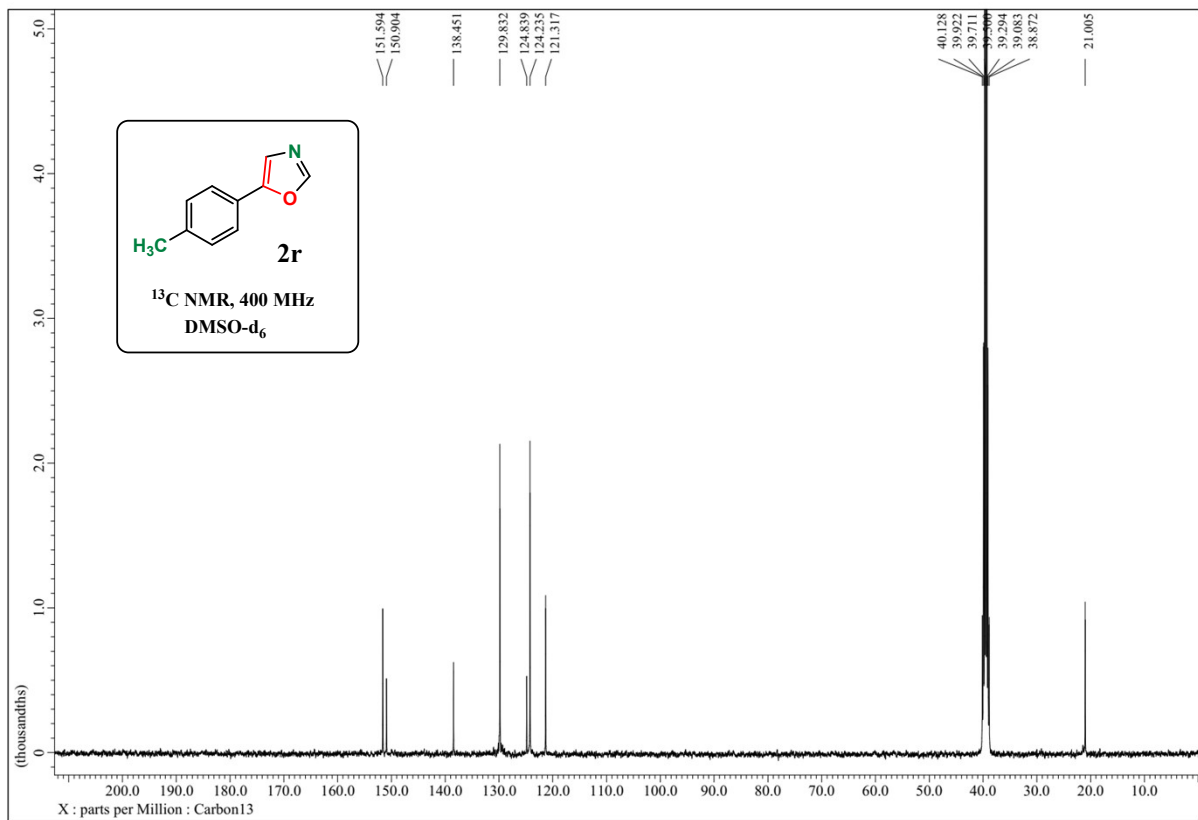

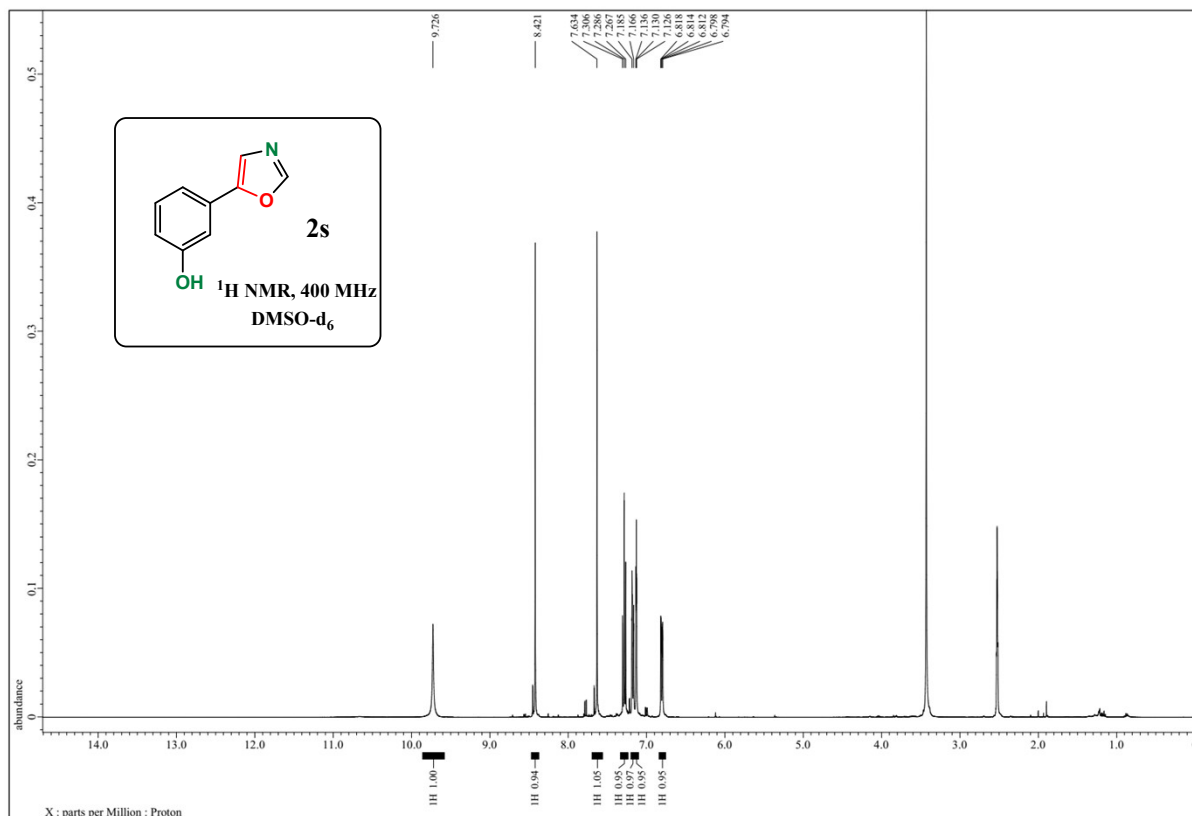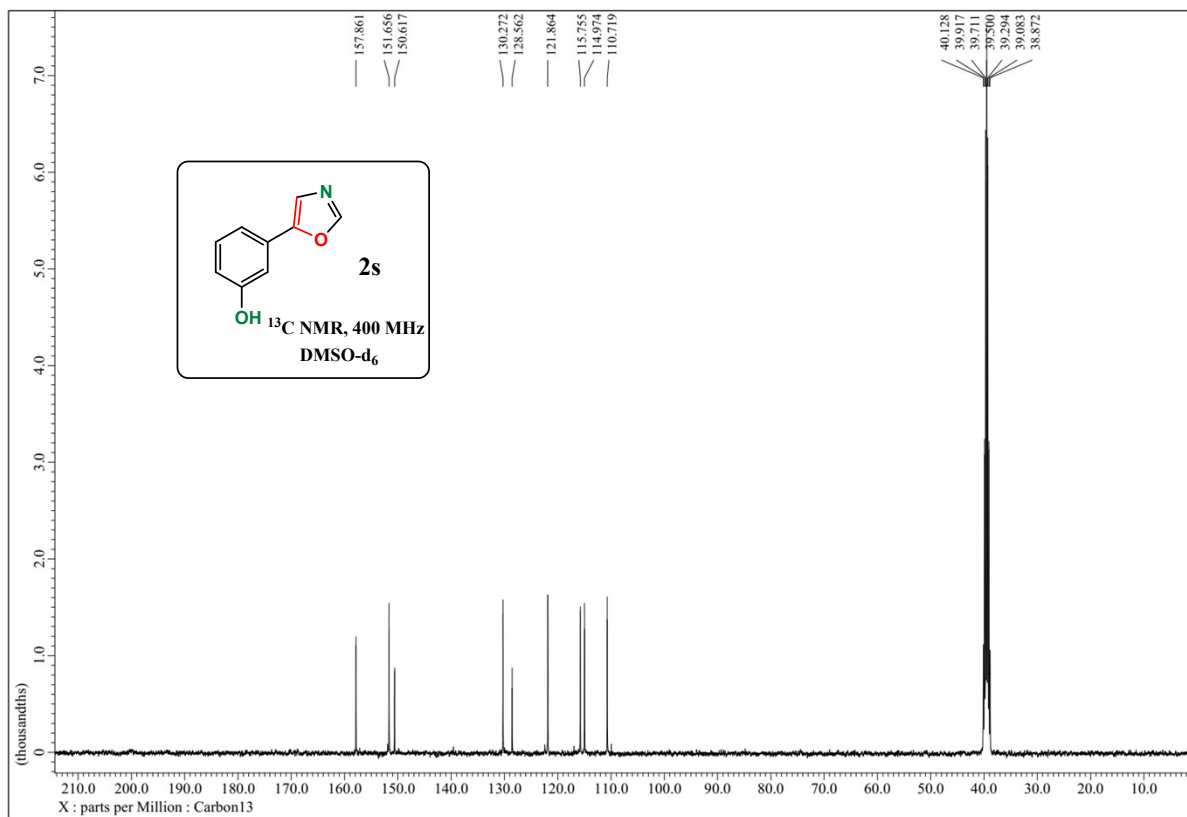



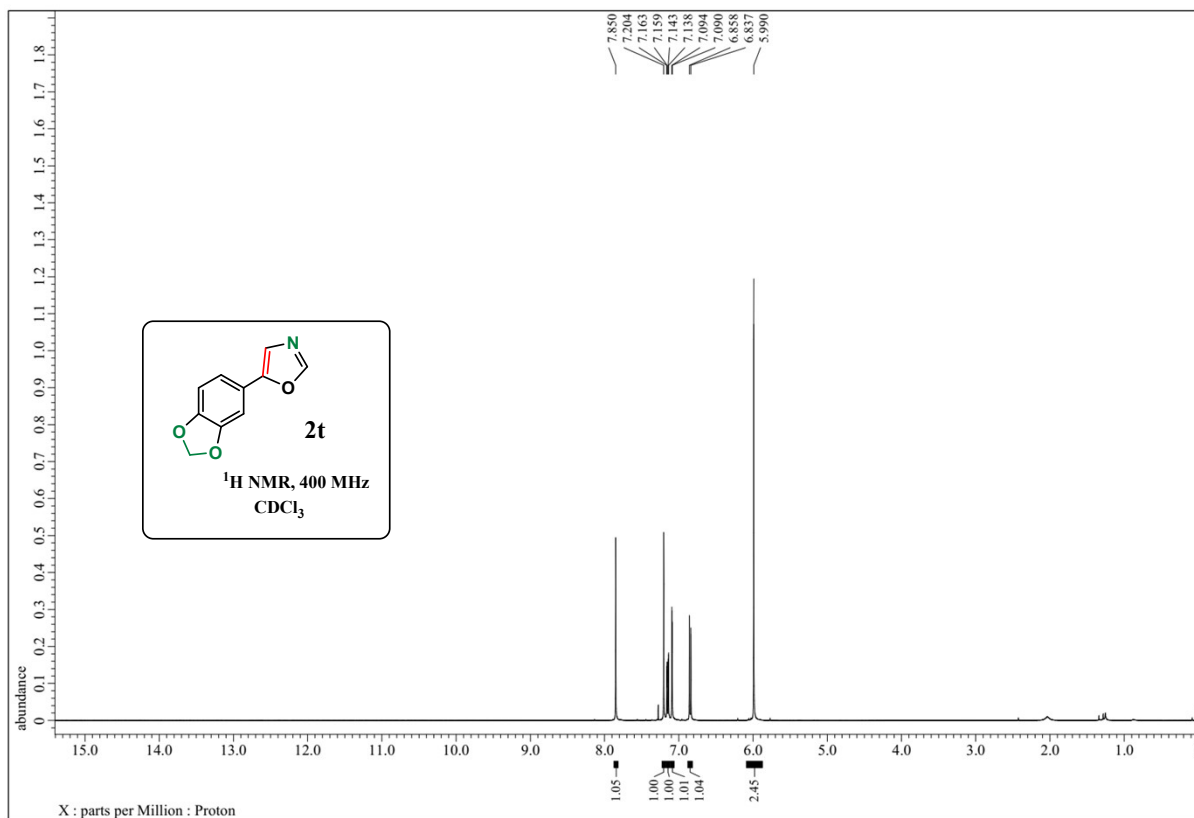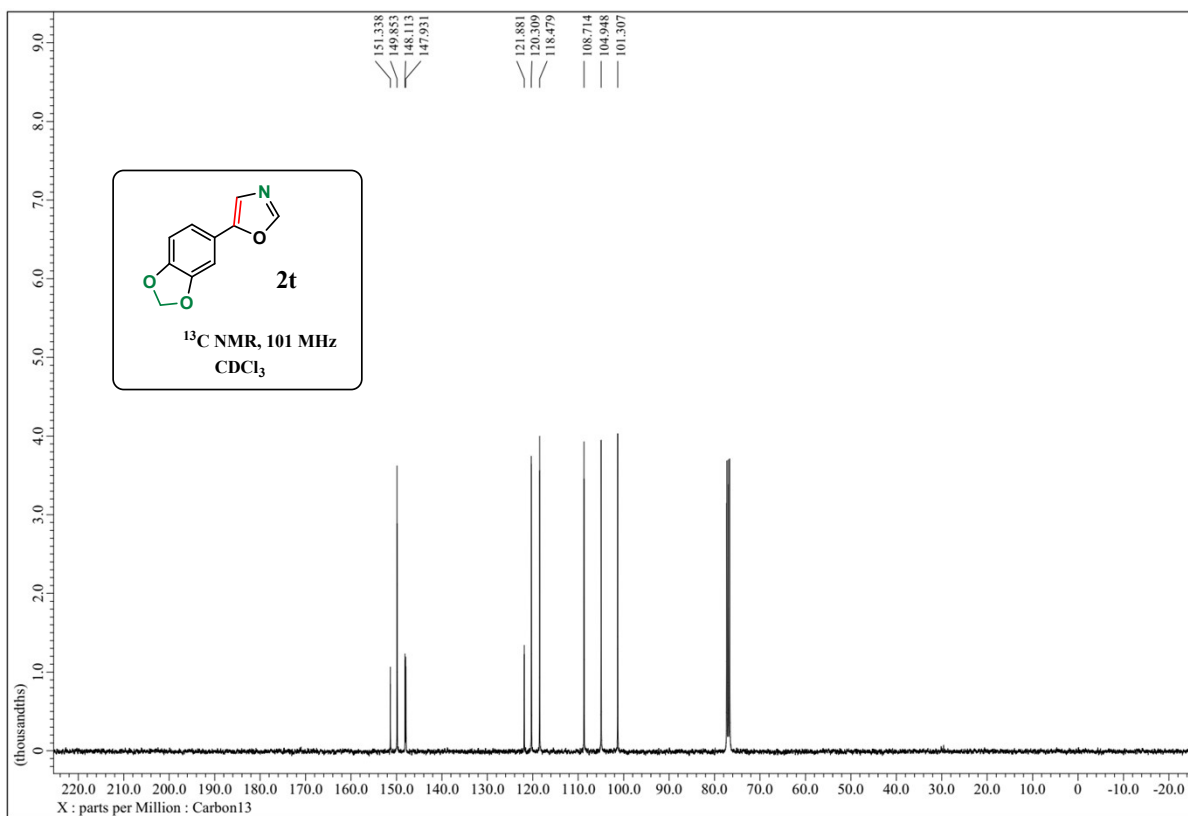

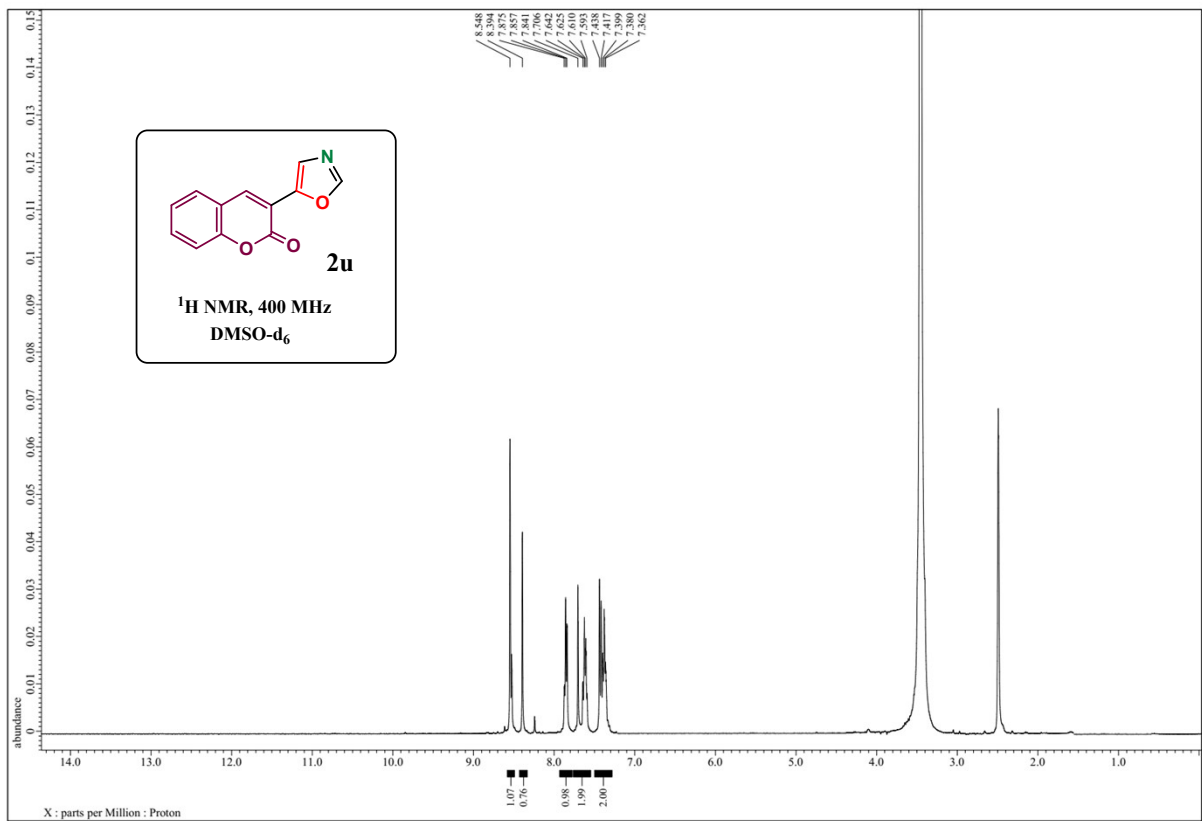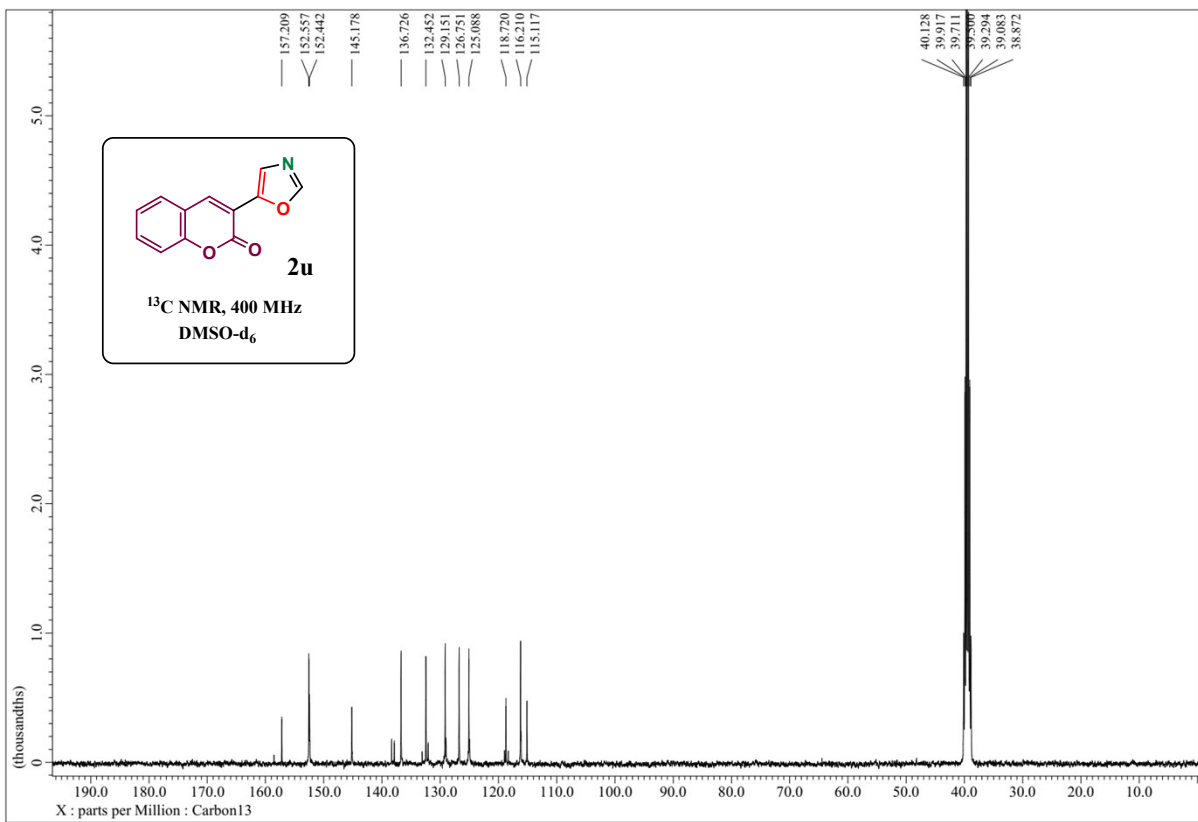

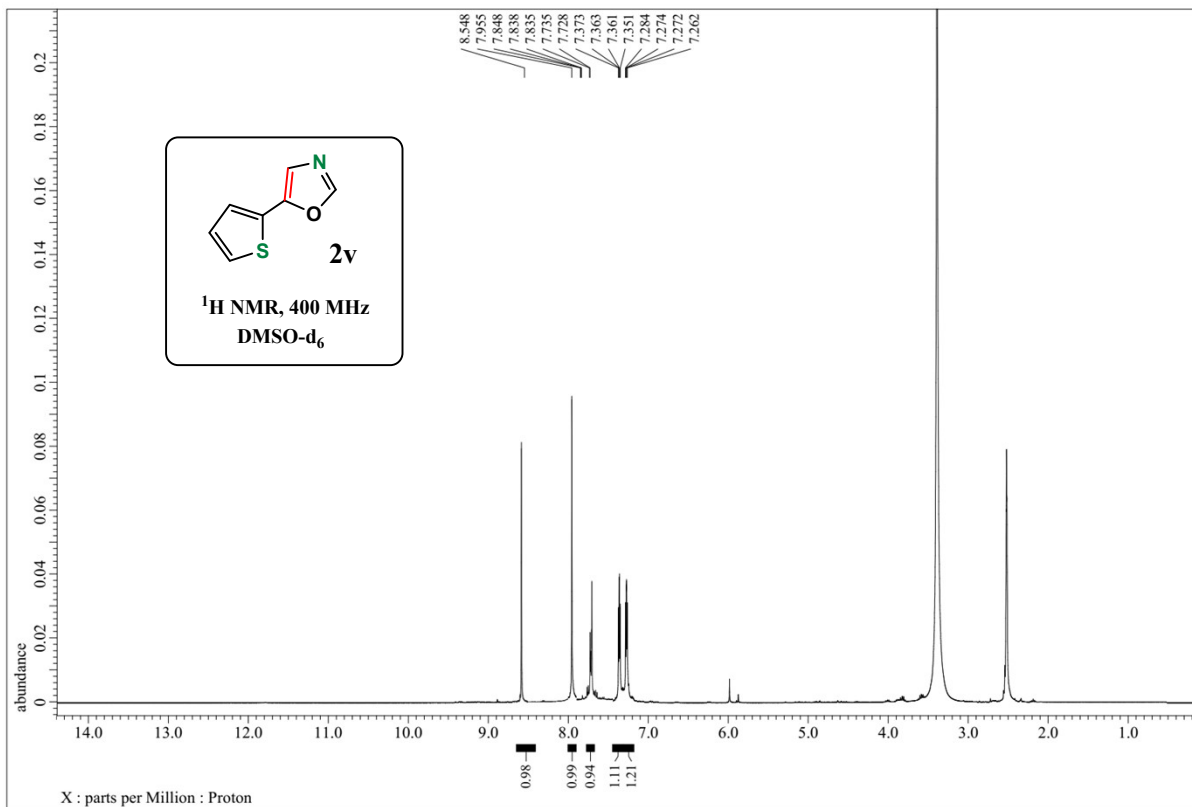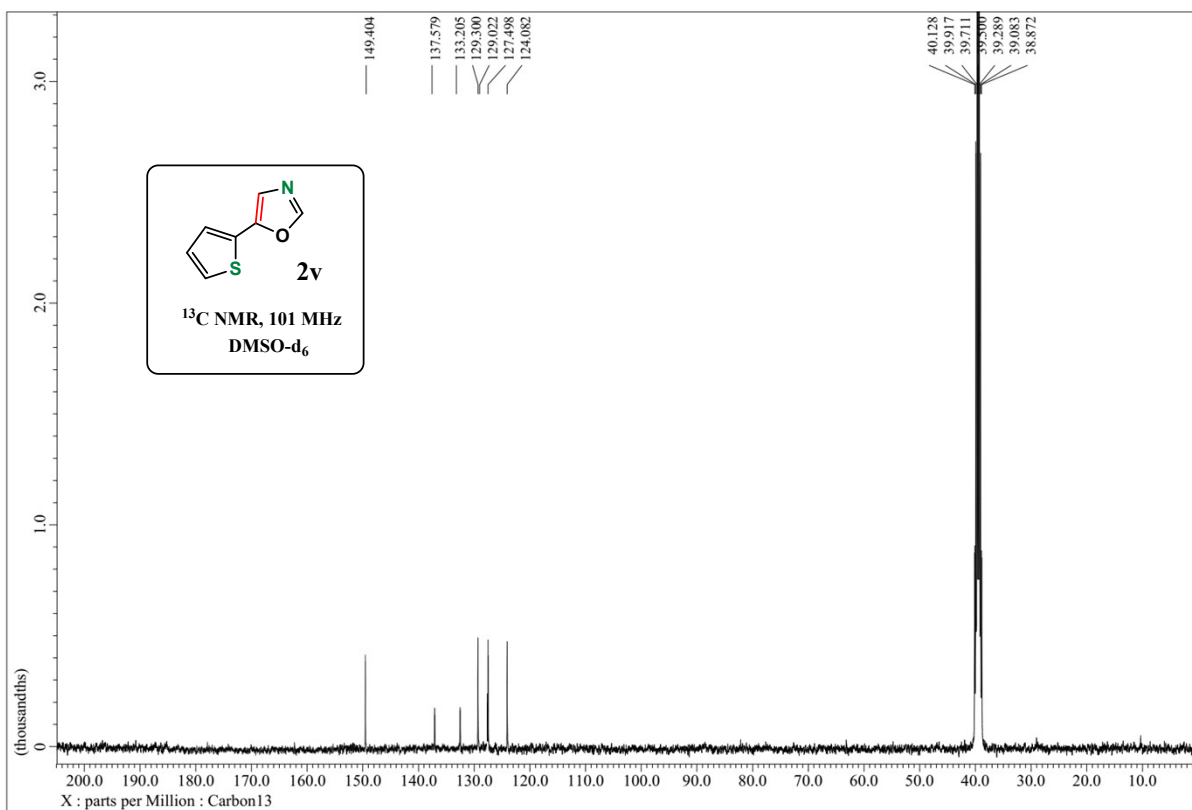

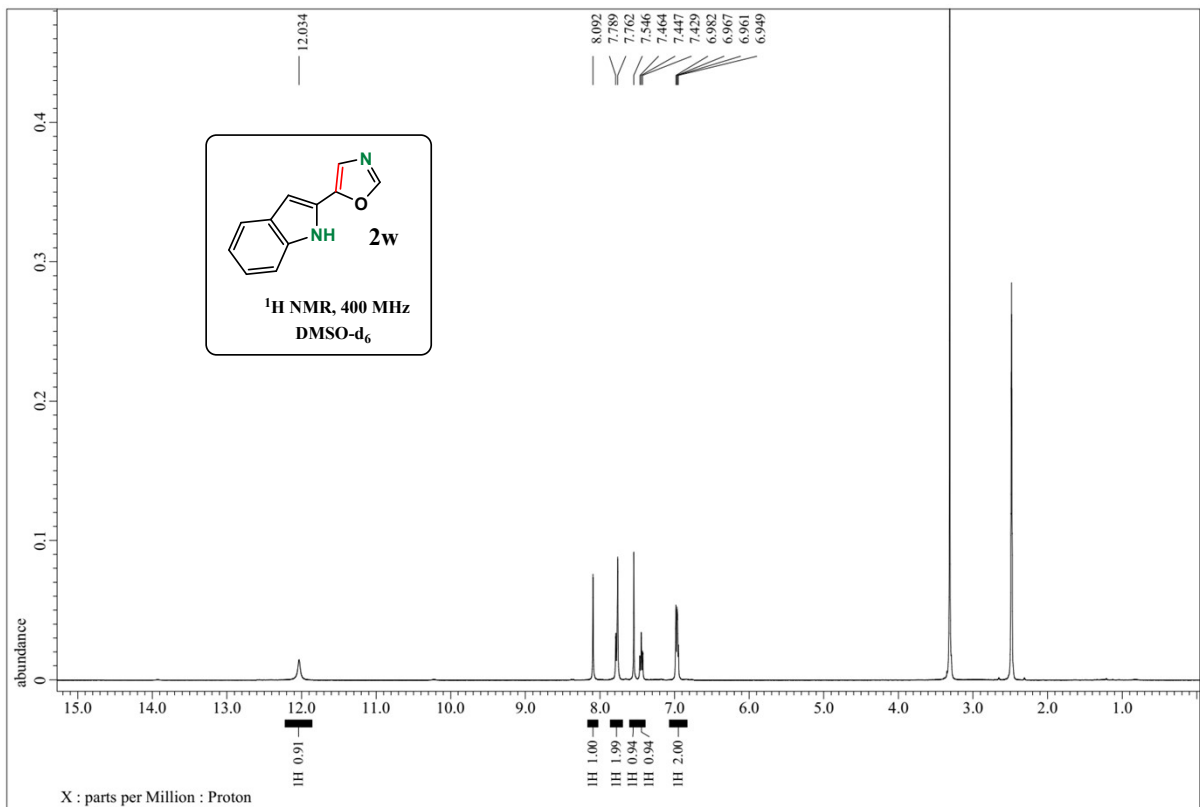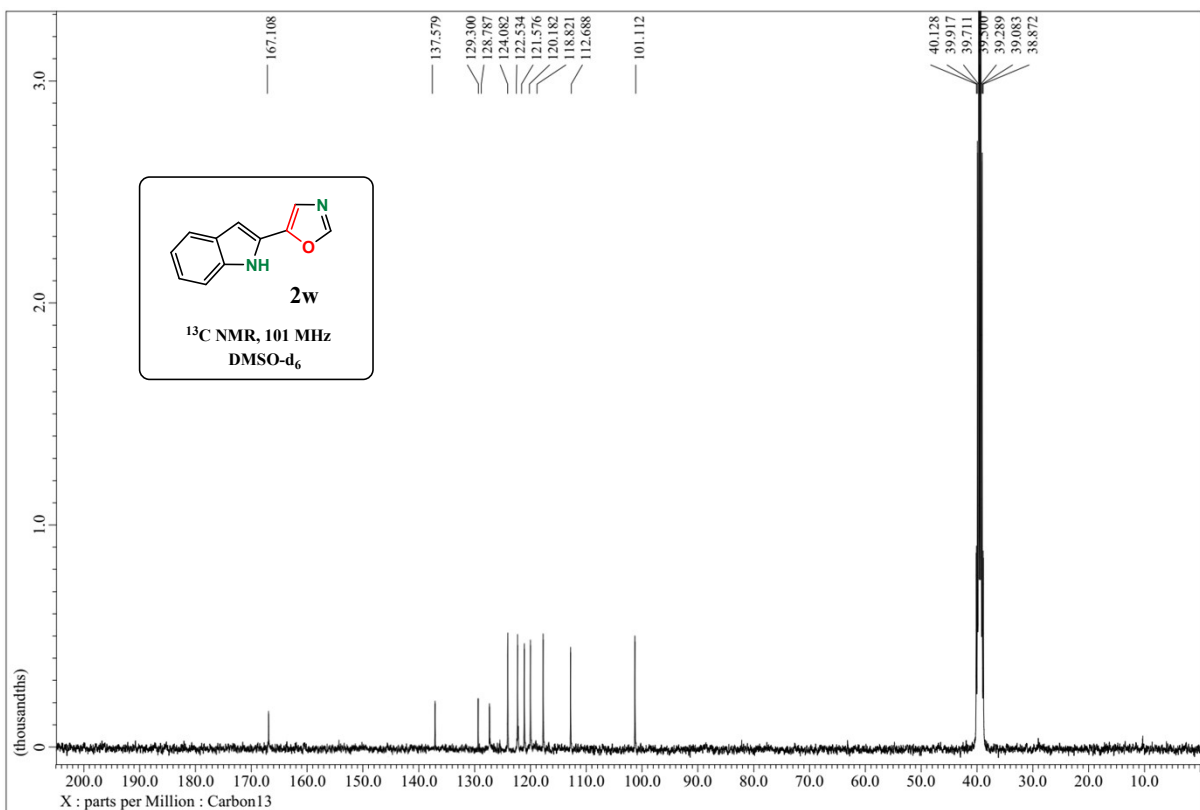

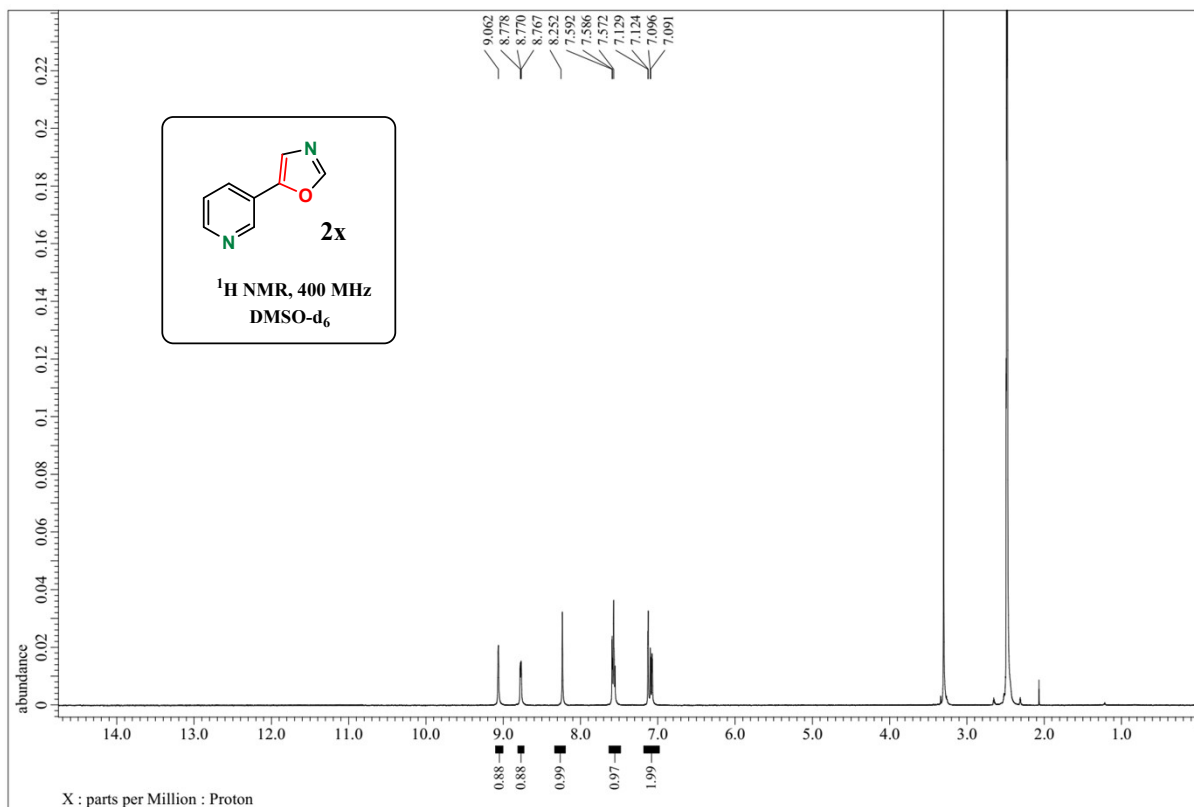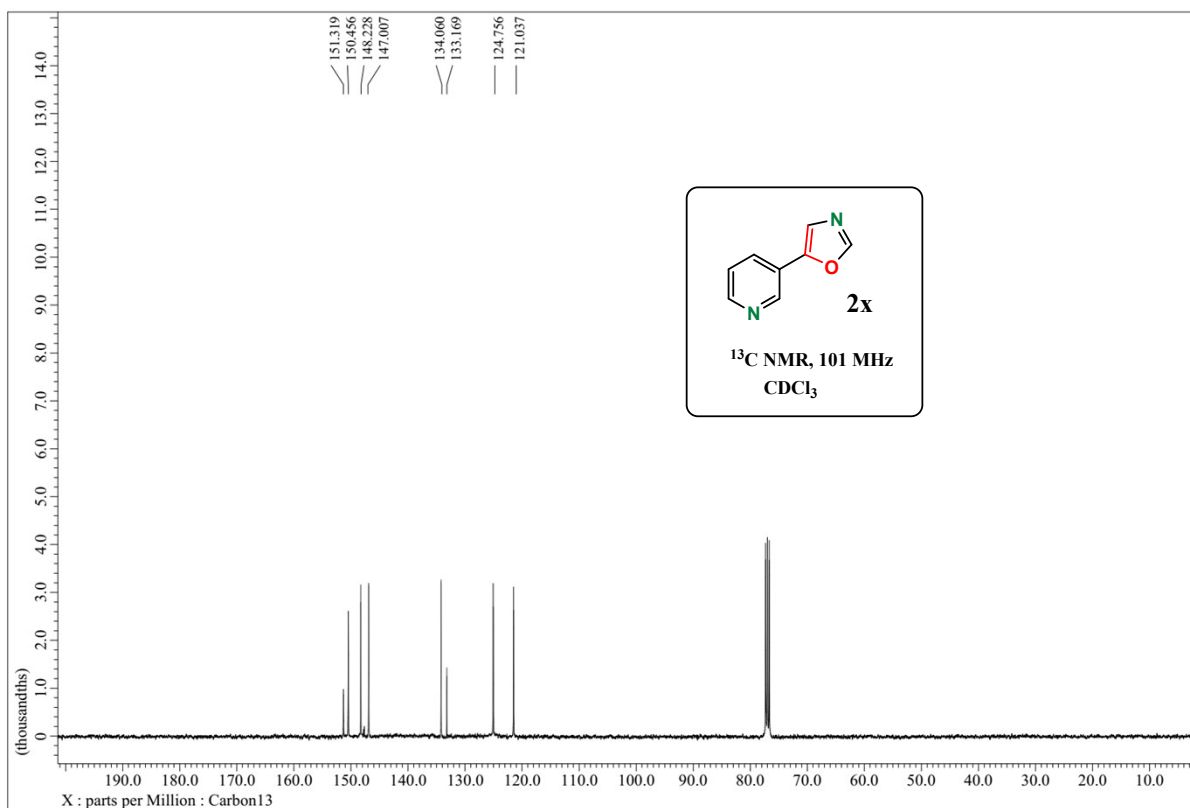

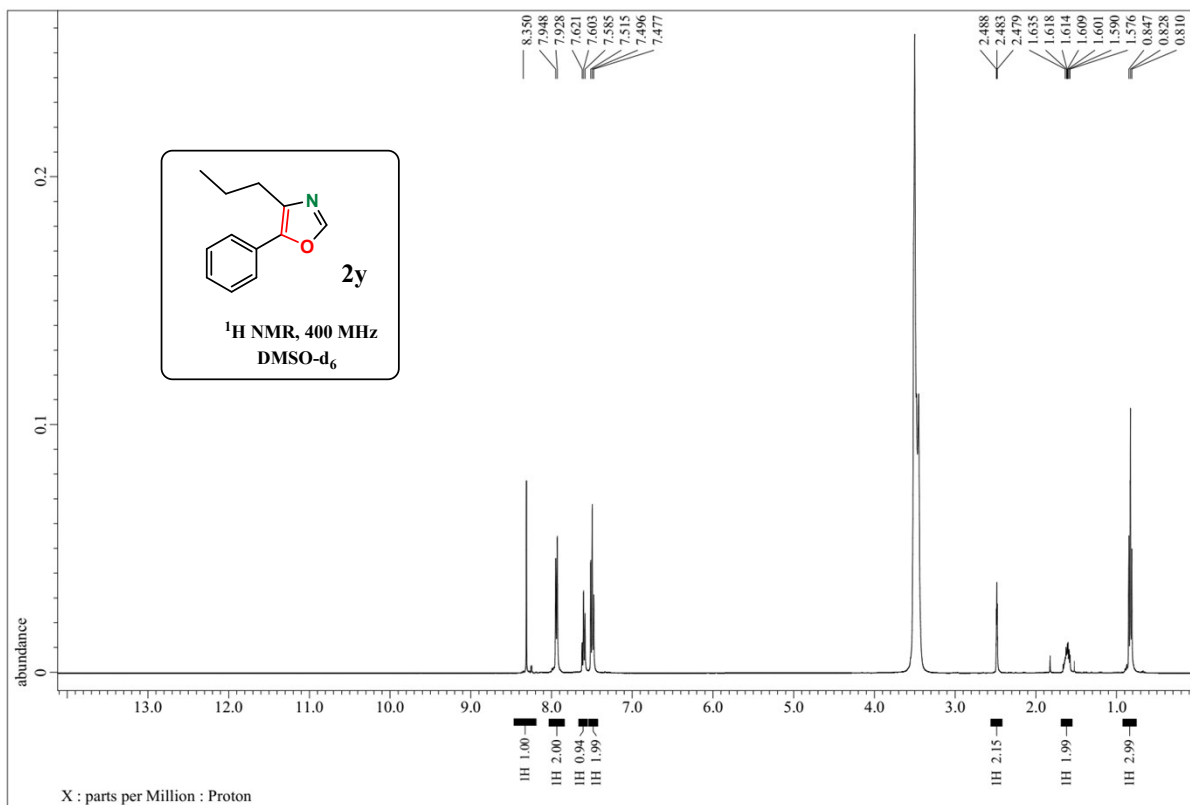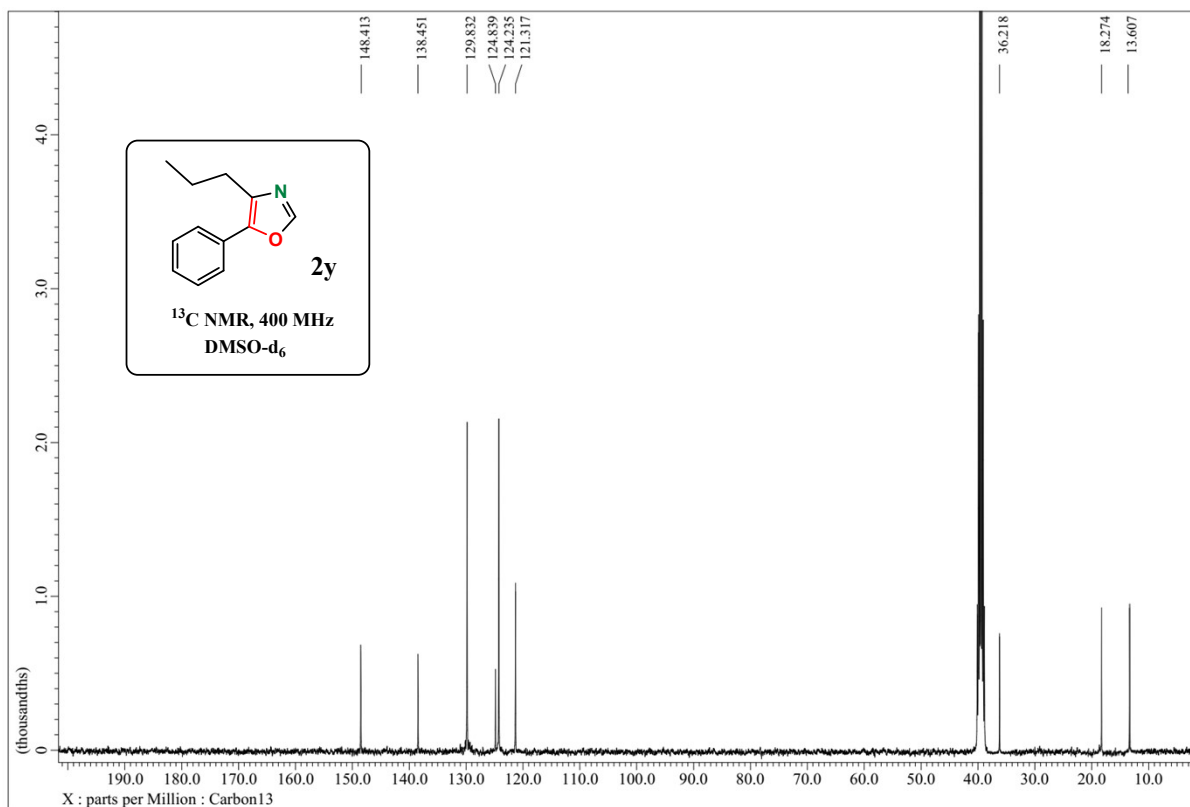

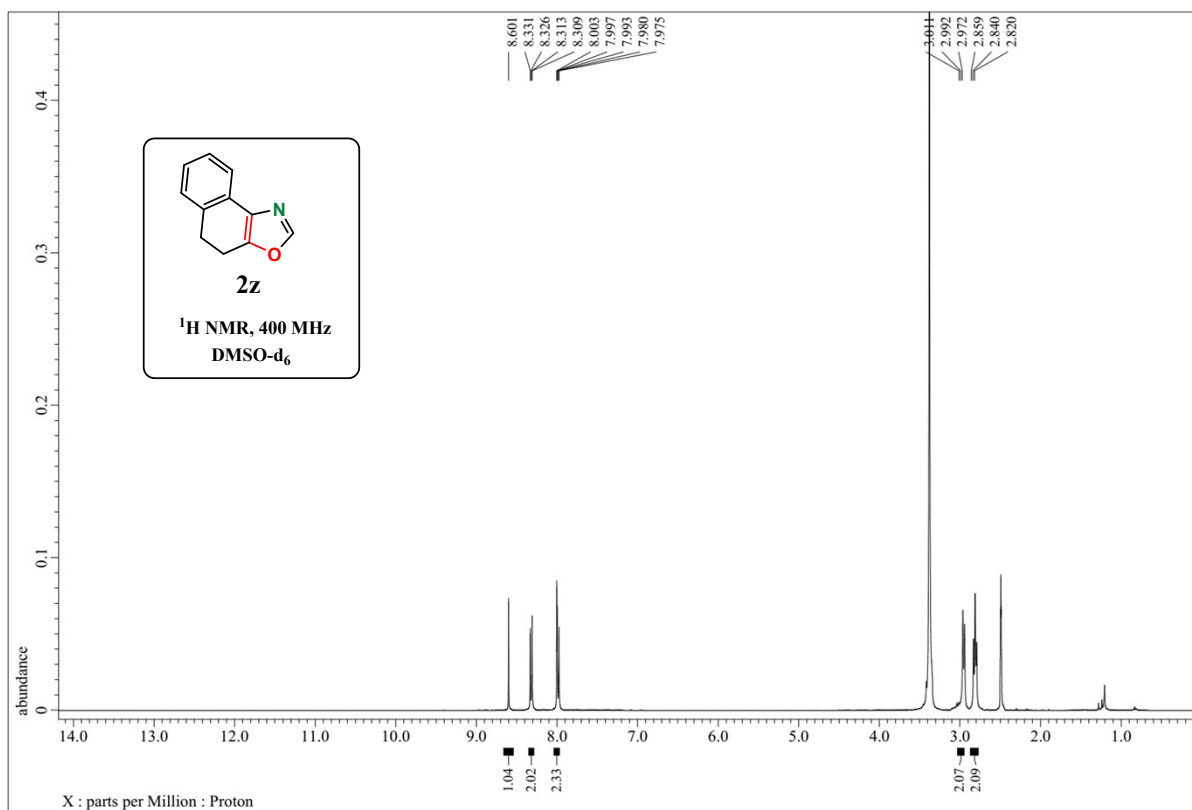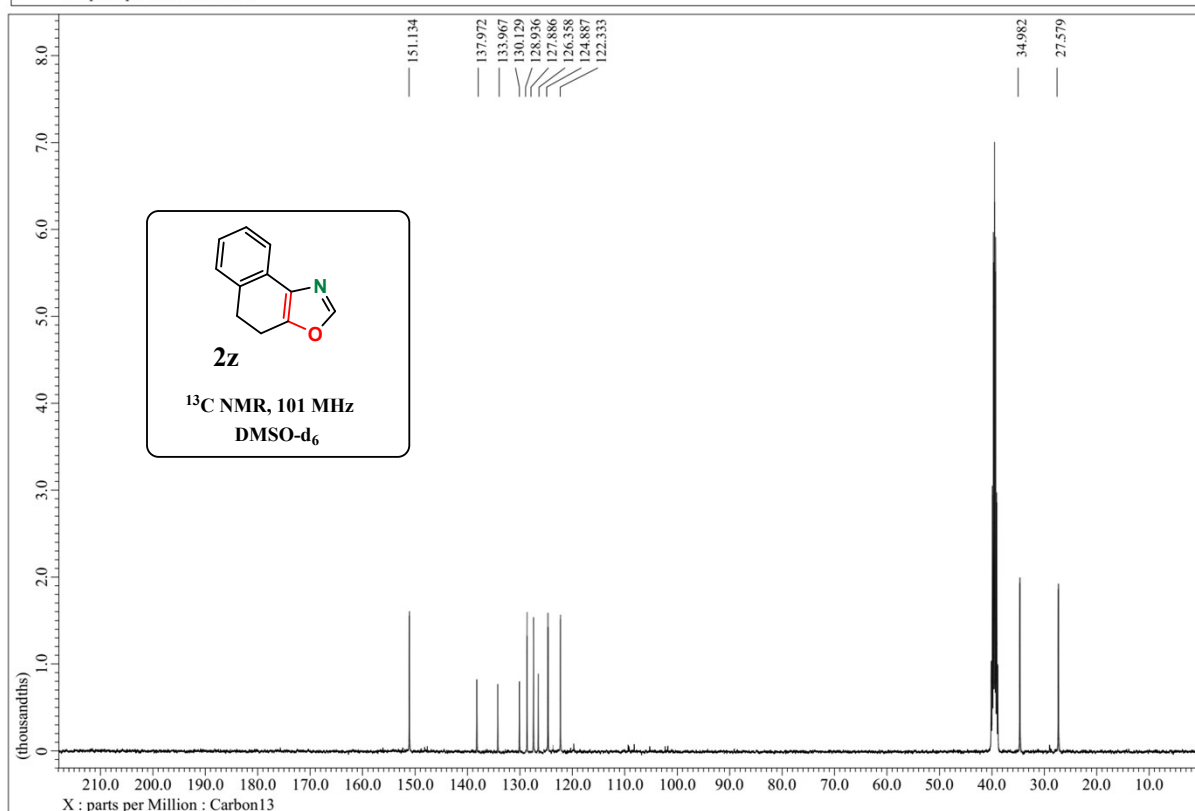

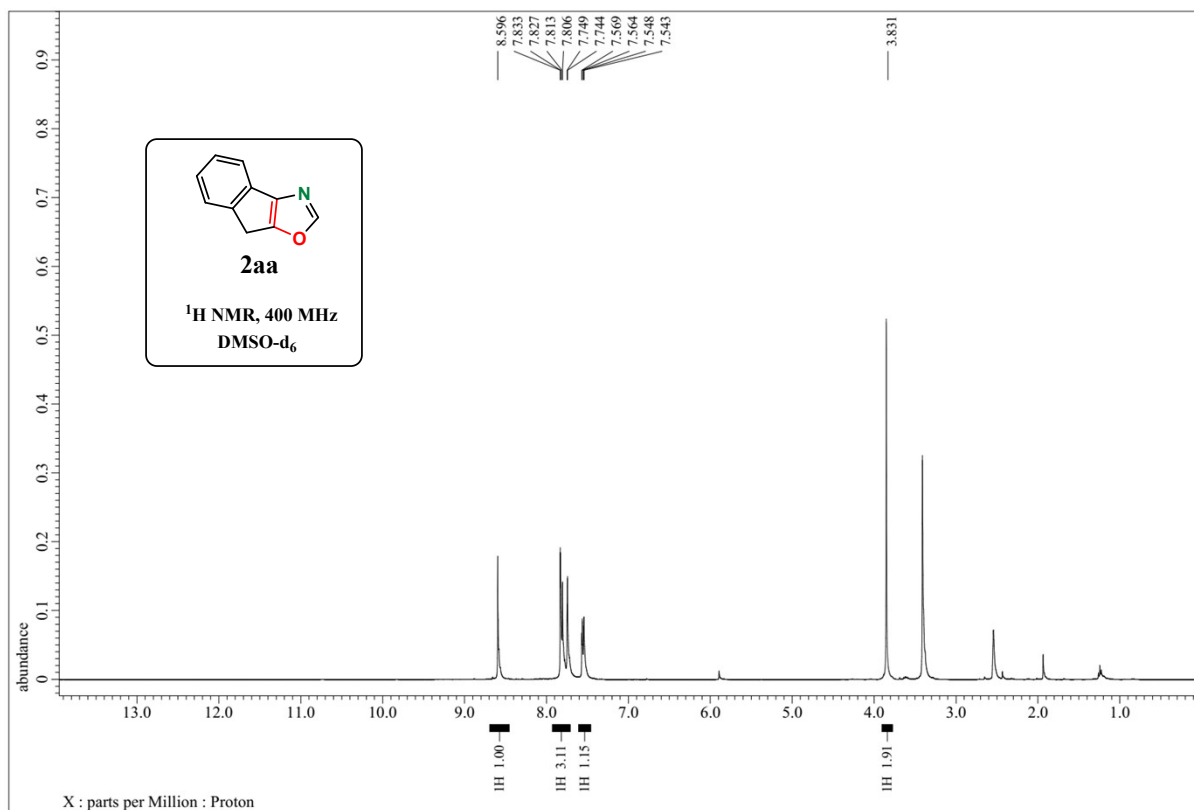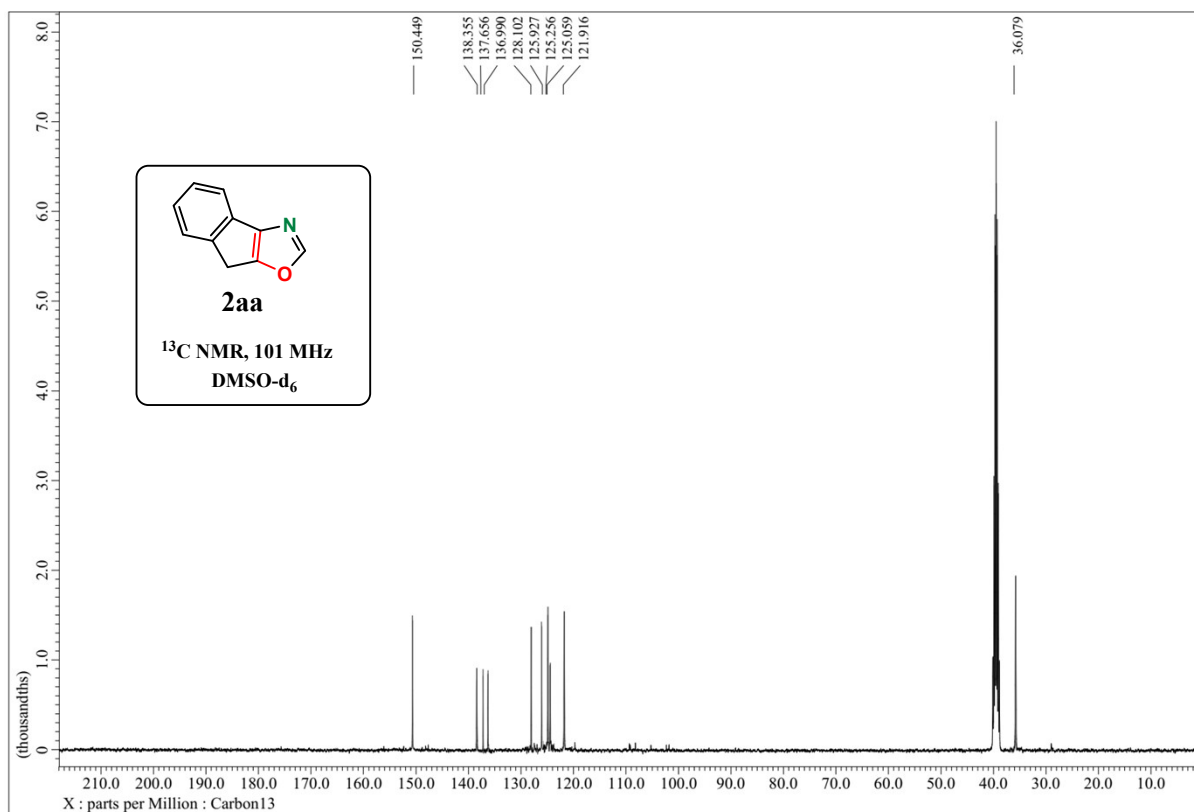



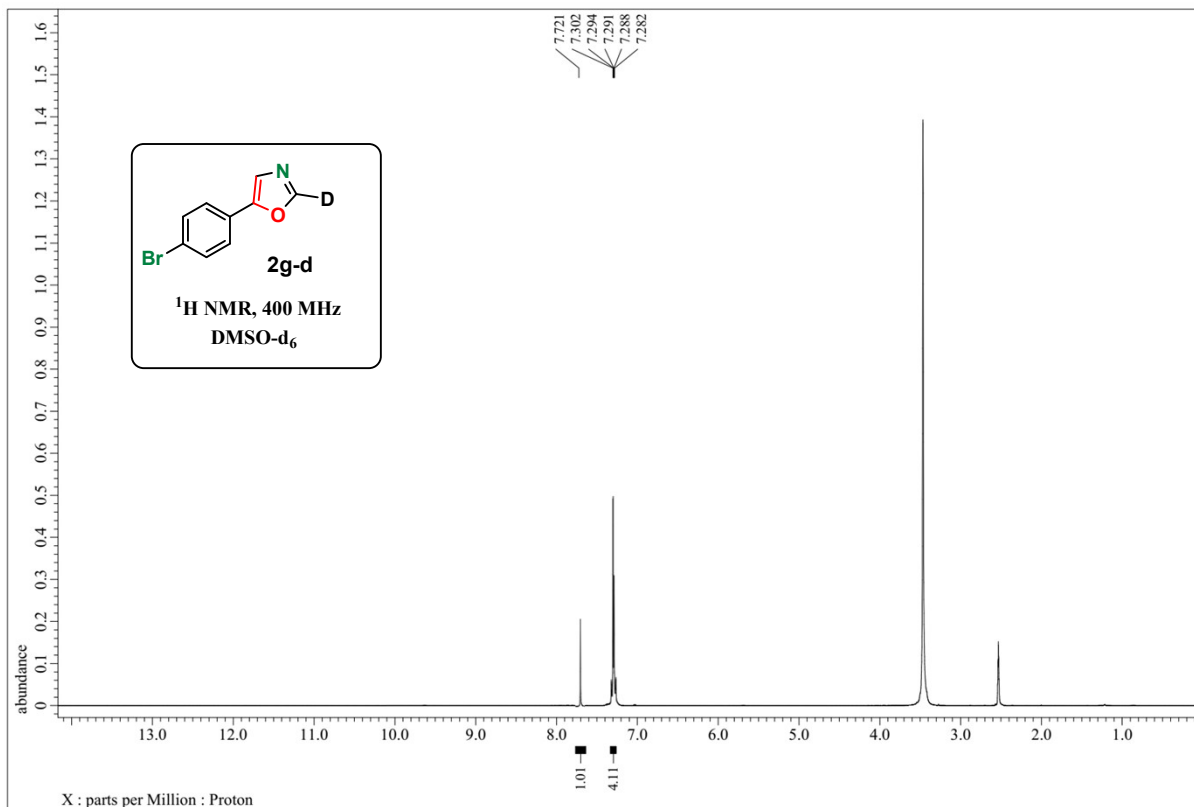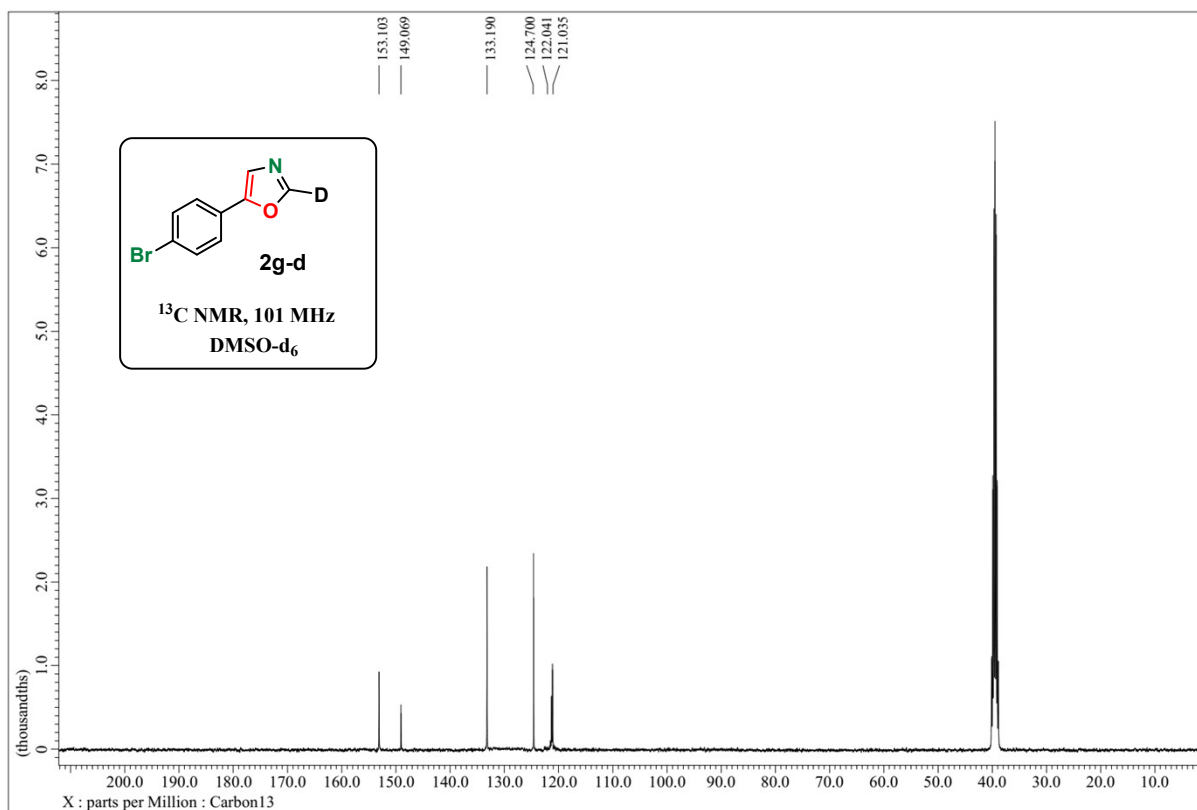

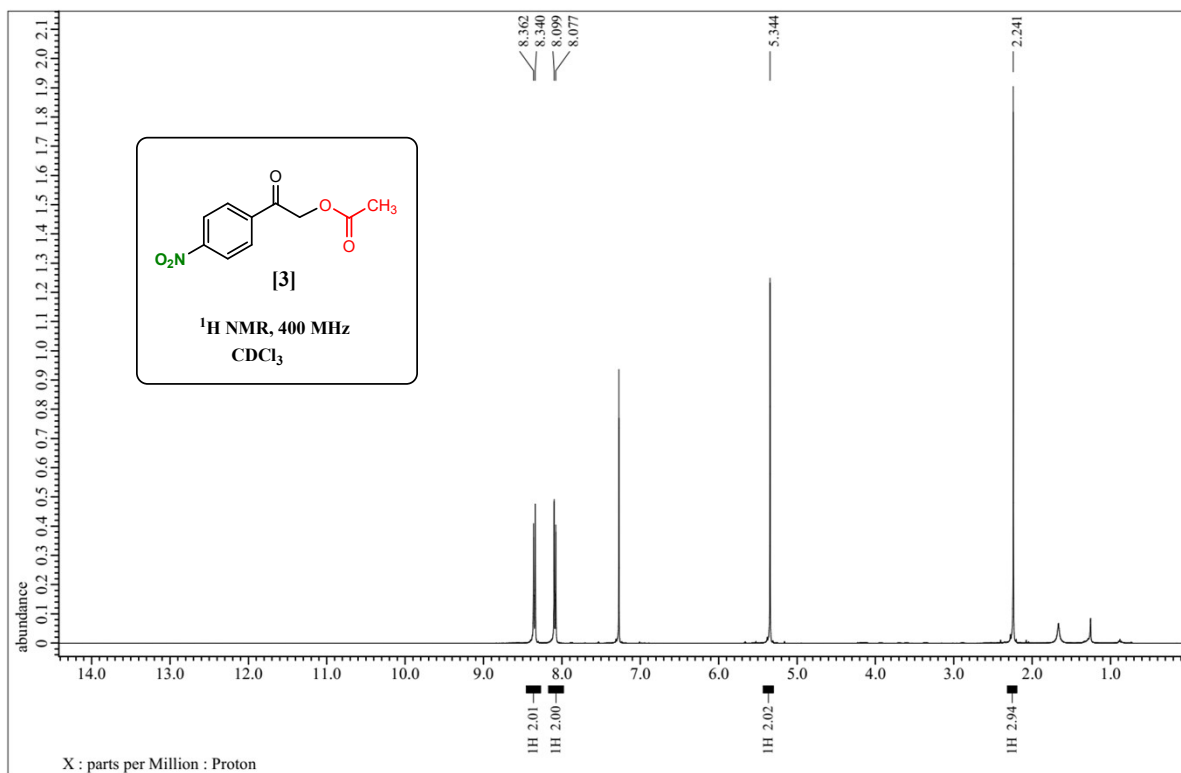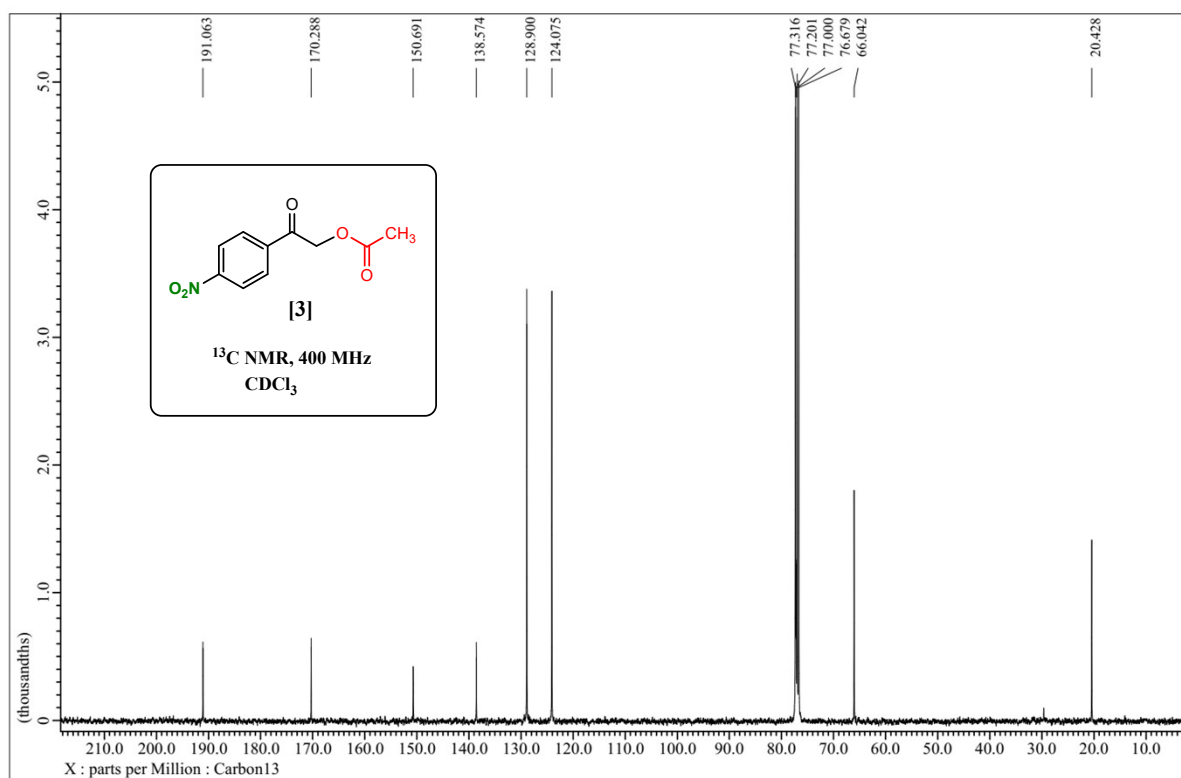

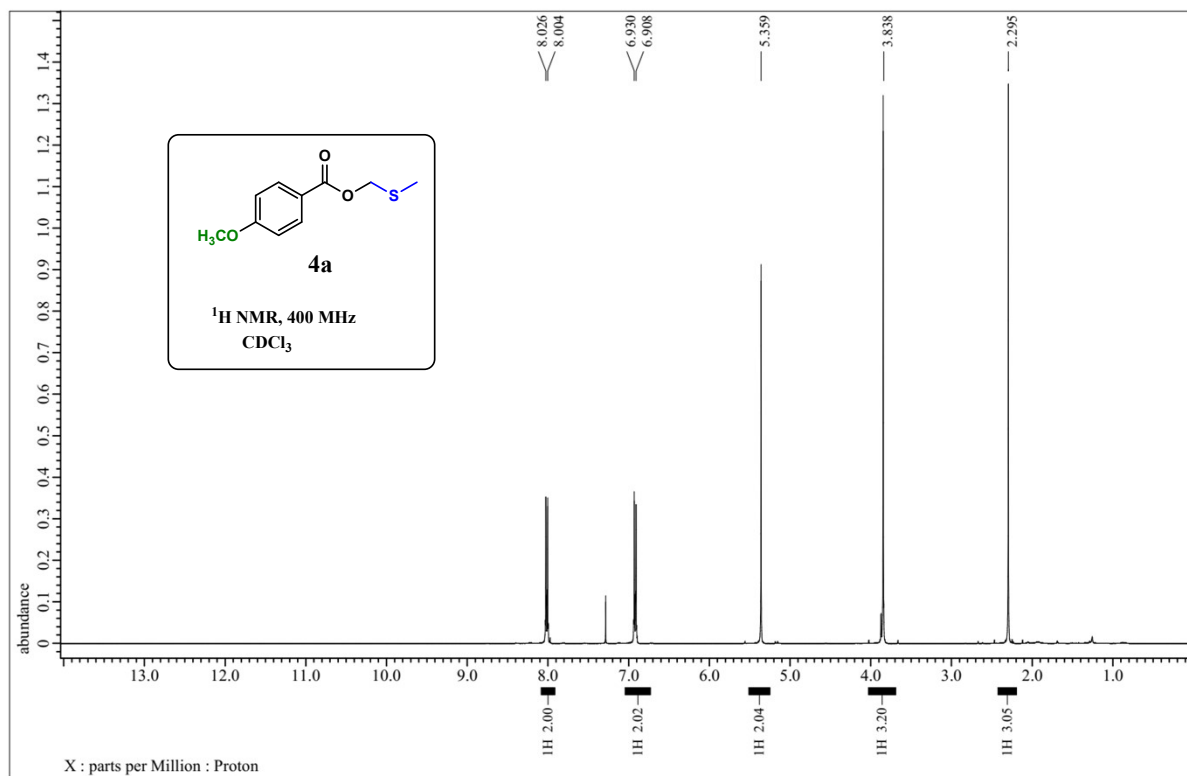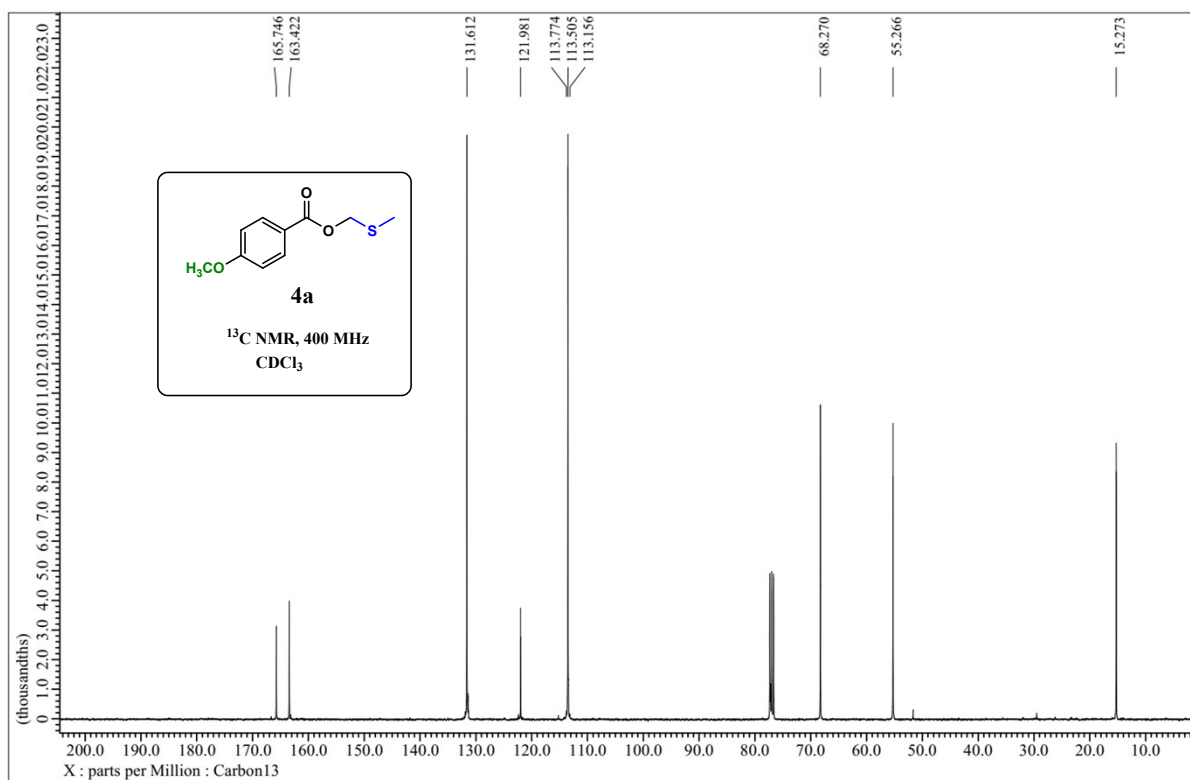

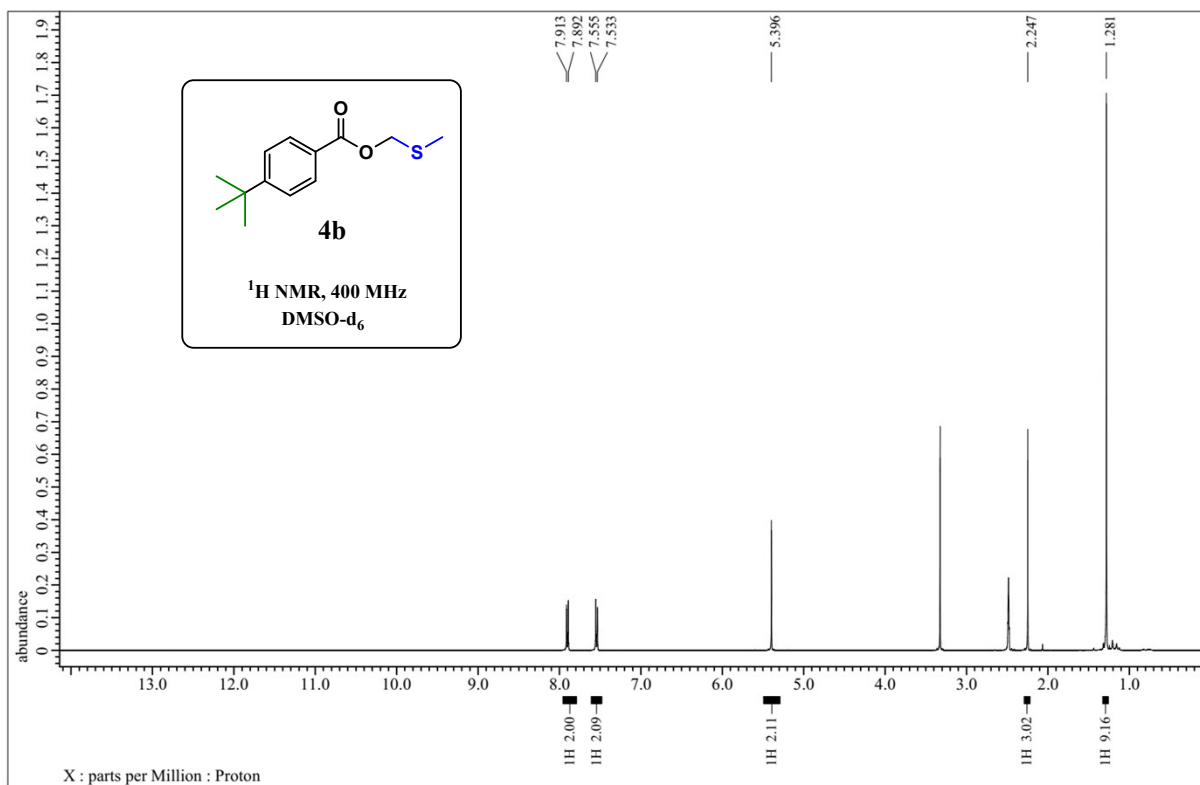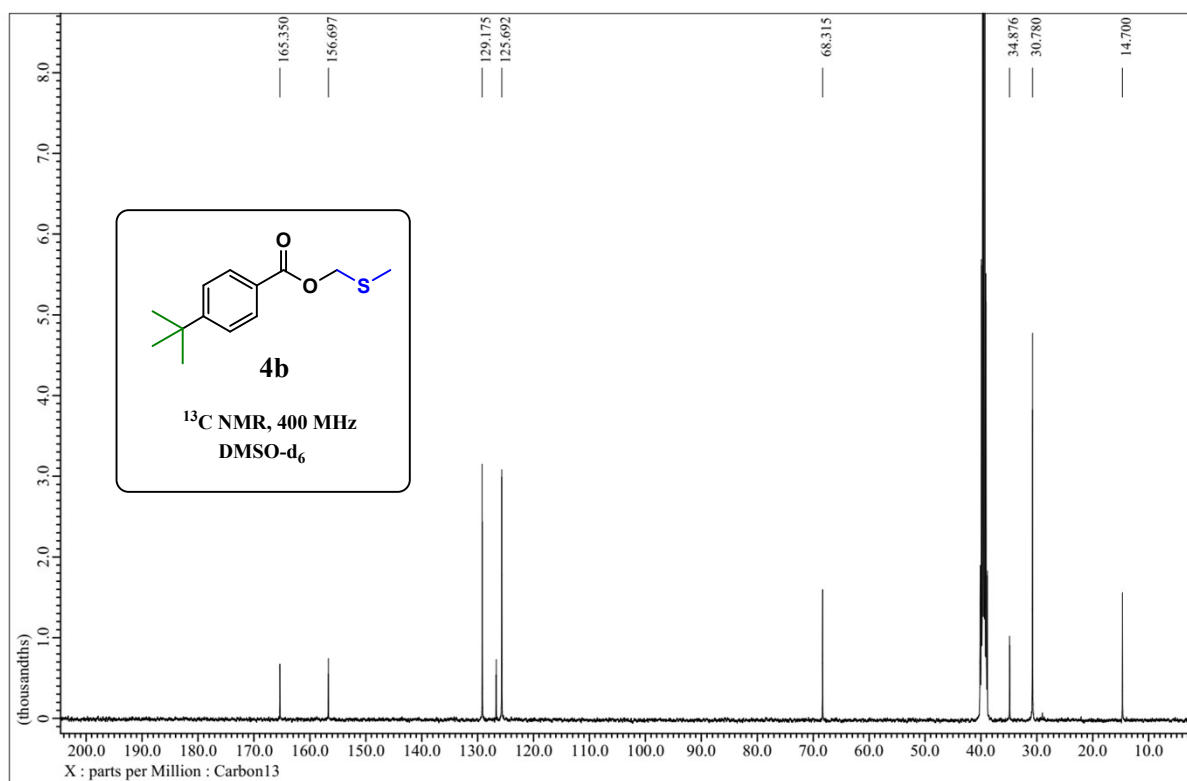

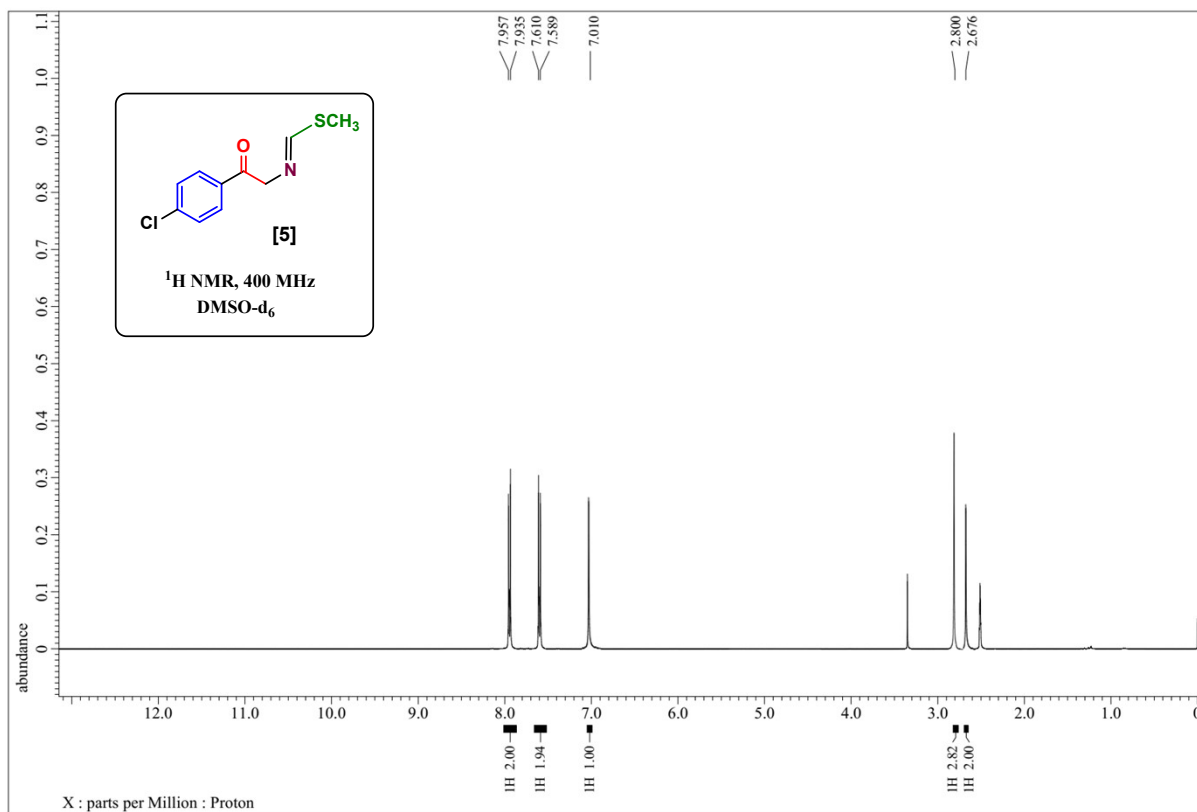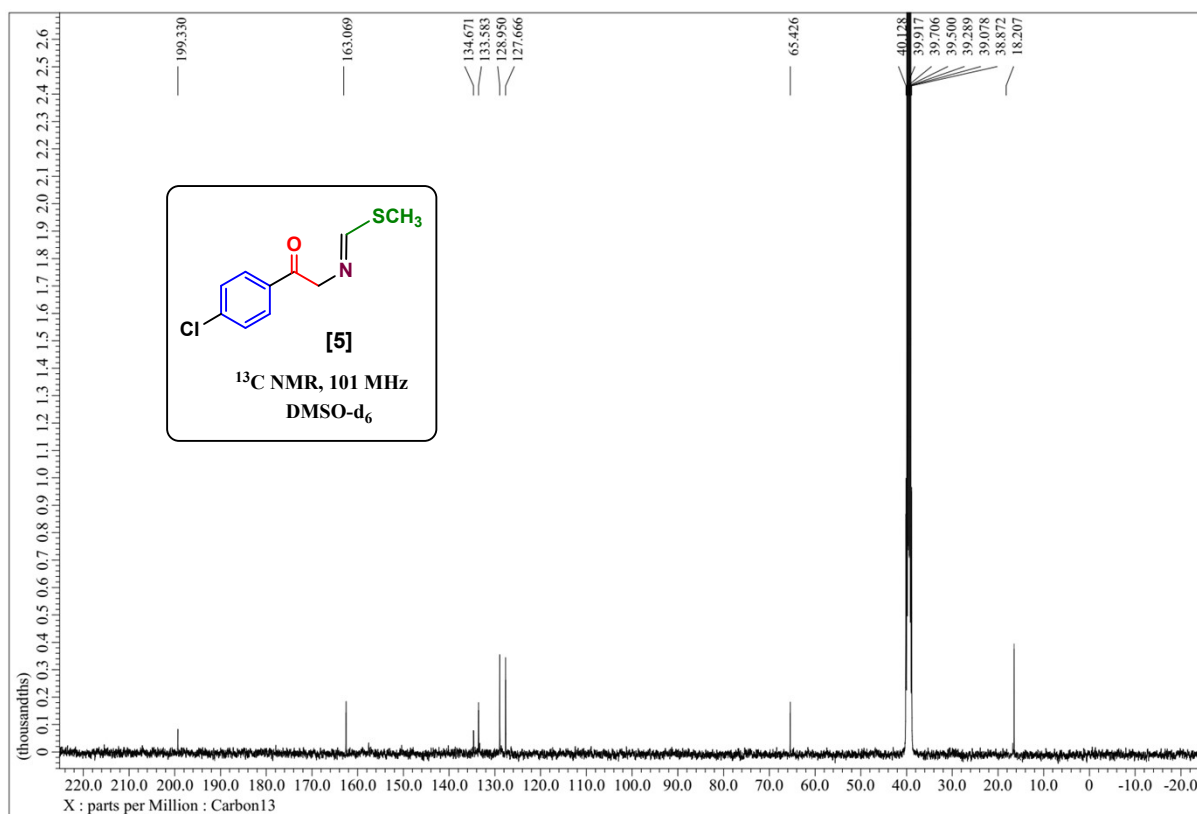

## References:

- (1) Mukku, N.; Madivalappa Davanagere, P.; Chanda, K.; Maiti, B. A Facile Microwave-Assisted Synthesis of Oxazoles and Diastereoselective Oxazolines Using Aryl-Aldehydes, p-Toluenesulfonylmethyl Isocyanide under Controlled Basic Conditions. *ACS Omega* **2020**, *5* (43), 28239–28248.
- (2) Zhang, L. J.; Xu, M. C.; Liu, J.; Zhang, X. M. Tandem Cycloaddition-Decarboxylation of  $\alpha$ -Keto Acid and Isocyanide under Oxidant-Free Conditions towards Monosubstituted Oxazoles. *RSC Adv.* **2016**, *6* (77), 73450–73453.
- (3) Xue, W. J.; Zhang, W.; Zheng, K. L.; Dai, Y.; Guo, Y. Q.; Li, H. Z.; Gao, F. F.; Wu, A. X. Formation of 2-Acyloxazoles by a Multipathway Coupled Domino Strategy: One-Pot Metal-Free Oxidative Cyclization Applicable to Various Substrates. *Asian J. Org. Chem.* **2013**, *2* (8), 638–641.
- (4) Pogaku, N.; Krishna, P. R.; Prapurna, Y. L. Iodine-Mediated Nucleophilic Direct Oxidative  $\alpha$ -Acetoxylation and  $\alpha$ -Alkoxylation of Ketones. *ChemistrySelect* **2019**, *4* (42), 12333–12336.
